# Supplementary material for: Phenotype-tissue expression and exploration (PTEE) resource facilitates the choice of tissue for RNA-seq-based clinical genetics studies
Source: Springer Nature journal article supplement (doi:10.1186/s12864-021-08125-9), 2021-11-07

# Phenotype-Tissue Expression and Exploration (PTEE) resource facilitates the choice of tissue for RNA-seq-based clinical genetics studies

Akhil Velluva <sup>1,2\*</sup>, Maximillian Radtke <sup>3</sup>, Susanne Horn <sup>2</sup>, Bernt Popp <sup>3</sup>, Konrad Platzer <sup>3</sup>, Erind Gjermani <sup>4,5</sup>, Chen-Ching Lin <sup>6</sup>, Johannes R. Lemke <sup>3</sup>, Antje Garten <sup>7</sup>, Torsten Schöneberg <sup>2</sup>, Matthias Blüher <sup>8</sup>, Rami Abou Jamra <sup>3</sup>, Diana Le Duc <sup>1,3,8\*</sup>

## Supplementary File 1

To determine whether the number of expressed genes can be influenced by the number of available samples/individuals per tissue we plotted the number of expressed genes (median TPM > 1.5) when sequentially incrementing the number analyzed samples by 1 (see graphs below).

We observed that for low number of samples the variation in the number of expressed genes is higher. The number of expressed genes reaches saturation for sample numbers over 100. This suggests that for tissues with low number of available samples: kidney cortex, kidney medulla, bladder, endocervix, ectocervix, and fallopian tube the analyses (correlation of gene expression between tissues, number of expressed genes, number of expressed transcripts) may display high variation.

| Tissue Name                  | Number of RNAseq Samples (GTEx) | Tissue Name                               | Number of RNAseq Samples (GTEx) | Tissue Name                         | Number of RNAseq Samples (GTEx) |
|------------------------------|---------------------------------|-------------------------------------------|---------------------------------|-------------------------------------|---------------------------------|
| Muscle – Skeletal            | 803                             | Stomach                                   | 359                             | Ovary                               | 180                             |
| Whole Blood                  | 755                             | Testis                                    | 361                             | Brain – Hippocampus                 | 197                             |
| Skin – Sun Exposed (Lower    | 701                             | Colon – Sigmoid                           | 373                             | Brain – Anterior cingulate cortex   | 176                             |
| Artery – Tibial              | 663                             | Pancreas                                  | 328                             | Cells – EBV-transformed lymphocytes | 174                             |
| Adipose – Subcutaneous       | 663                             | Pituitary                                 | 283                             | Minor Salivary Gland                | 162                             |
| Thyroid                      | 653                             | Adrenal Gland                             | 258                             | Vagina                              | 156                             |
| Nerve – Tibial               | 619                             | Spleen                                    | 241                             | Brain – Amygdala                    | 152                             |
| Skin – Not Sun Exposed       | 604                             | Prostate                                  | 245                             | Uterus                              | 142                             |
| Lung                         | 578                             | Artery – Coronary                         | 240                             | Brain – Spinal cord (cervical c-1)  | 159                             |
| Esophagus – Mucosa           | 555                             | Brain – Cerebellum                        | 241                             | Brain – Substantia nigra            | 139                             |
| Cells – Cultured fibroblasts | 504                             | Liver                                     | 226                             | Kidney – Cortex                     | 85                              |
| Adipose – Visceral           | 541                             | Brain – Cortex                            | 255                             | Bladder                             | 21                              |
| Esophagus – Muscularis       | 515                             | Brain – Nucleus accumbens (basal ganglia) | 246                             | Cervix – Endocervix                 | 10                              |
| Breast – Mammary Tissue      | 459                             | Brain – Caudate (basal ganglia)           | 246                             | Cervix – Ectocervix                 | 9                               |
| Artery – Aorta               | 432                             | Brain – Cerebellar Hemisphere             | 215                             | Fallopian Tube                      | 9                               |
| Heart – Left Ventricle       | 432                             | Brain – Frontal Cortex (BA9)              | 209                             | Kidney – Medulla                    | 4                               |
| Heart – Atrial Appendage     | 429                             | Small Intestine – Terminal Ileum          | 187                             |                                     |                                 |
| Colon – Transverse           | 406                             | Brain – Hypothalamus                      | 202                             |                                     |                                 |
| Esophagus –                  | 375                             | Brain – Putamen (basal ganglia)           | 205                             |                                     |                                 |

**Gene expression saturation in subcutaneous adipose tissue  
(total number of samples = 663)**

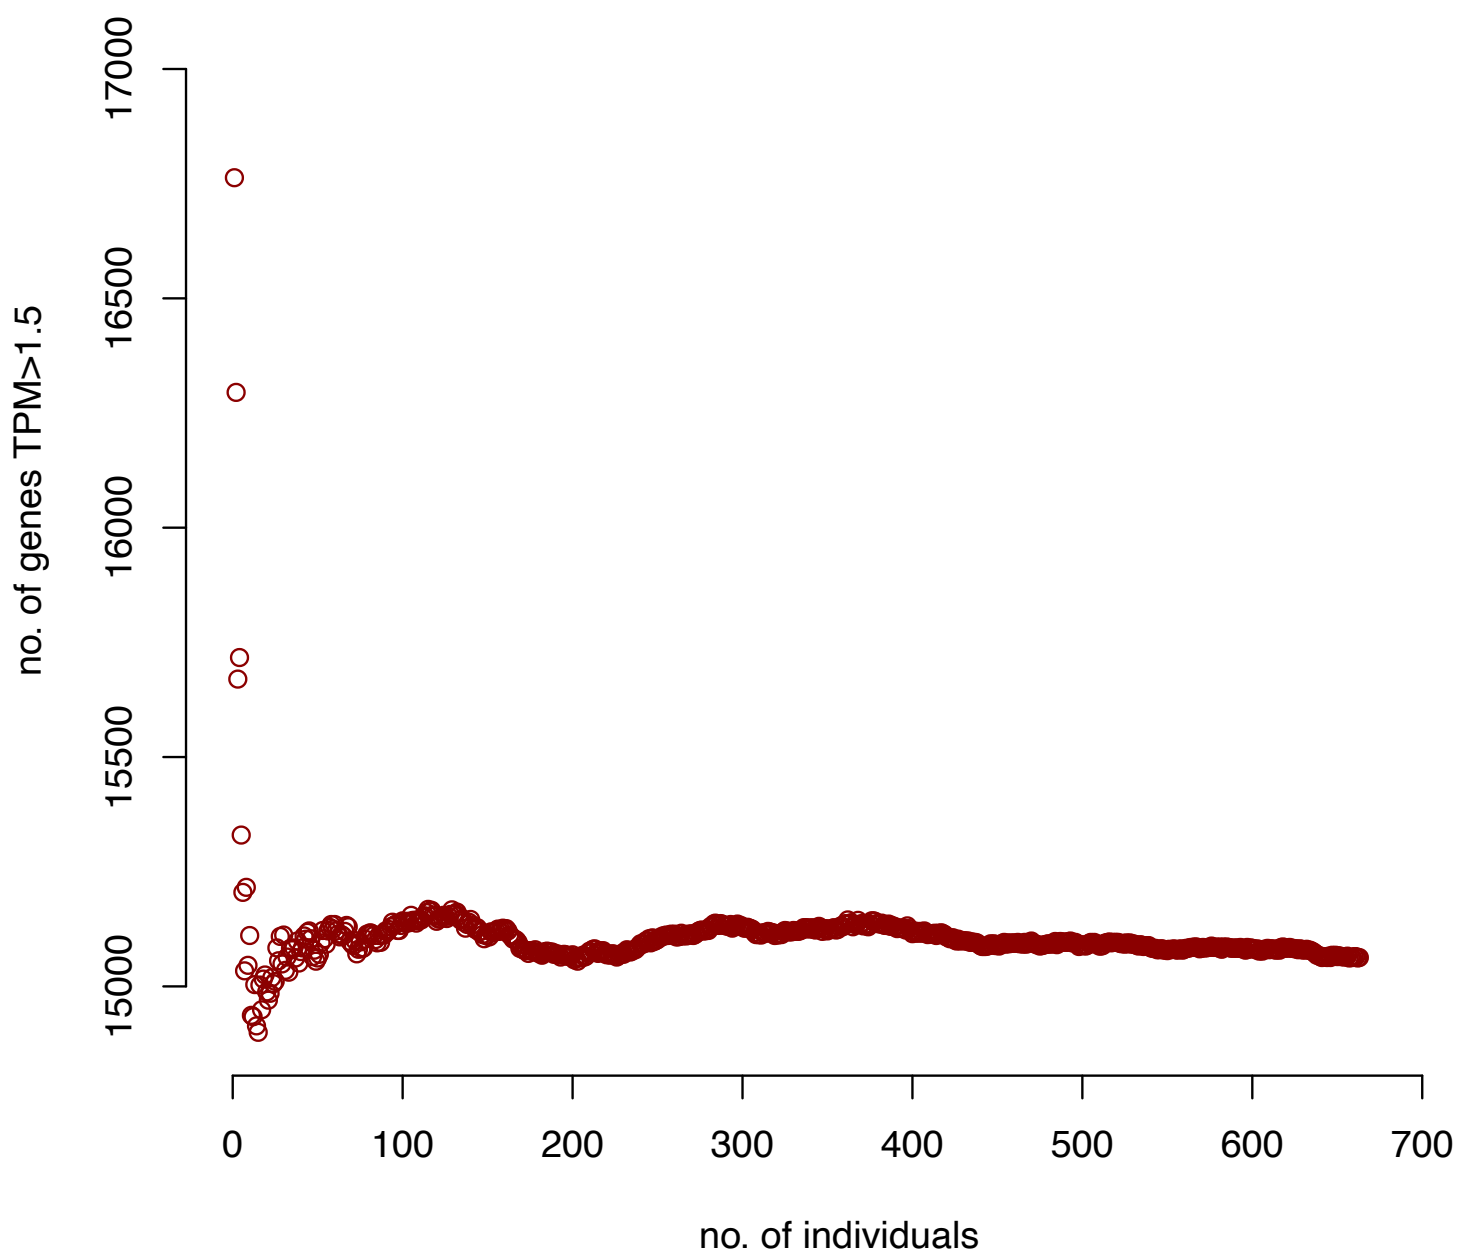



**Gene expression saturation in visceral (omentum) adipose tissue  
(total number of samples = 541)**

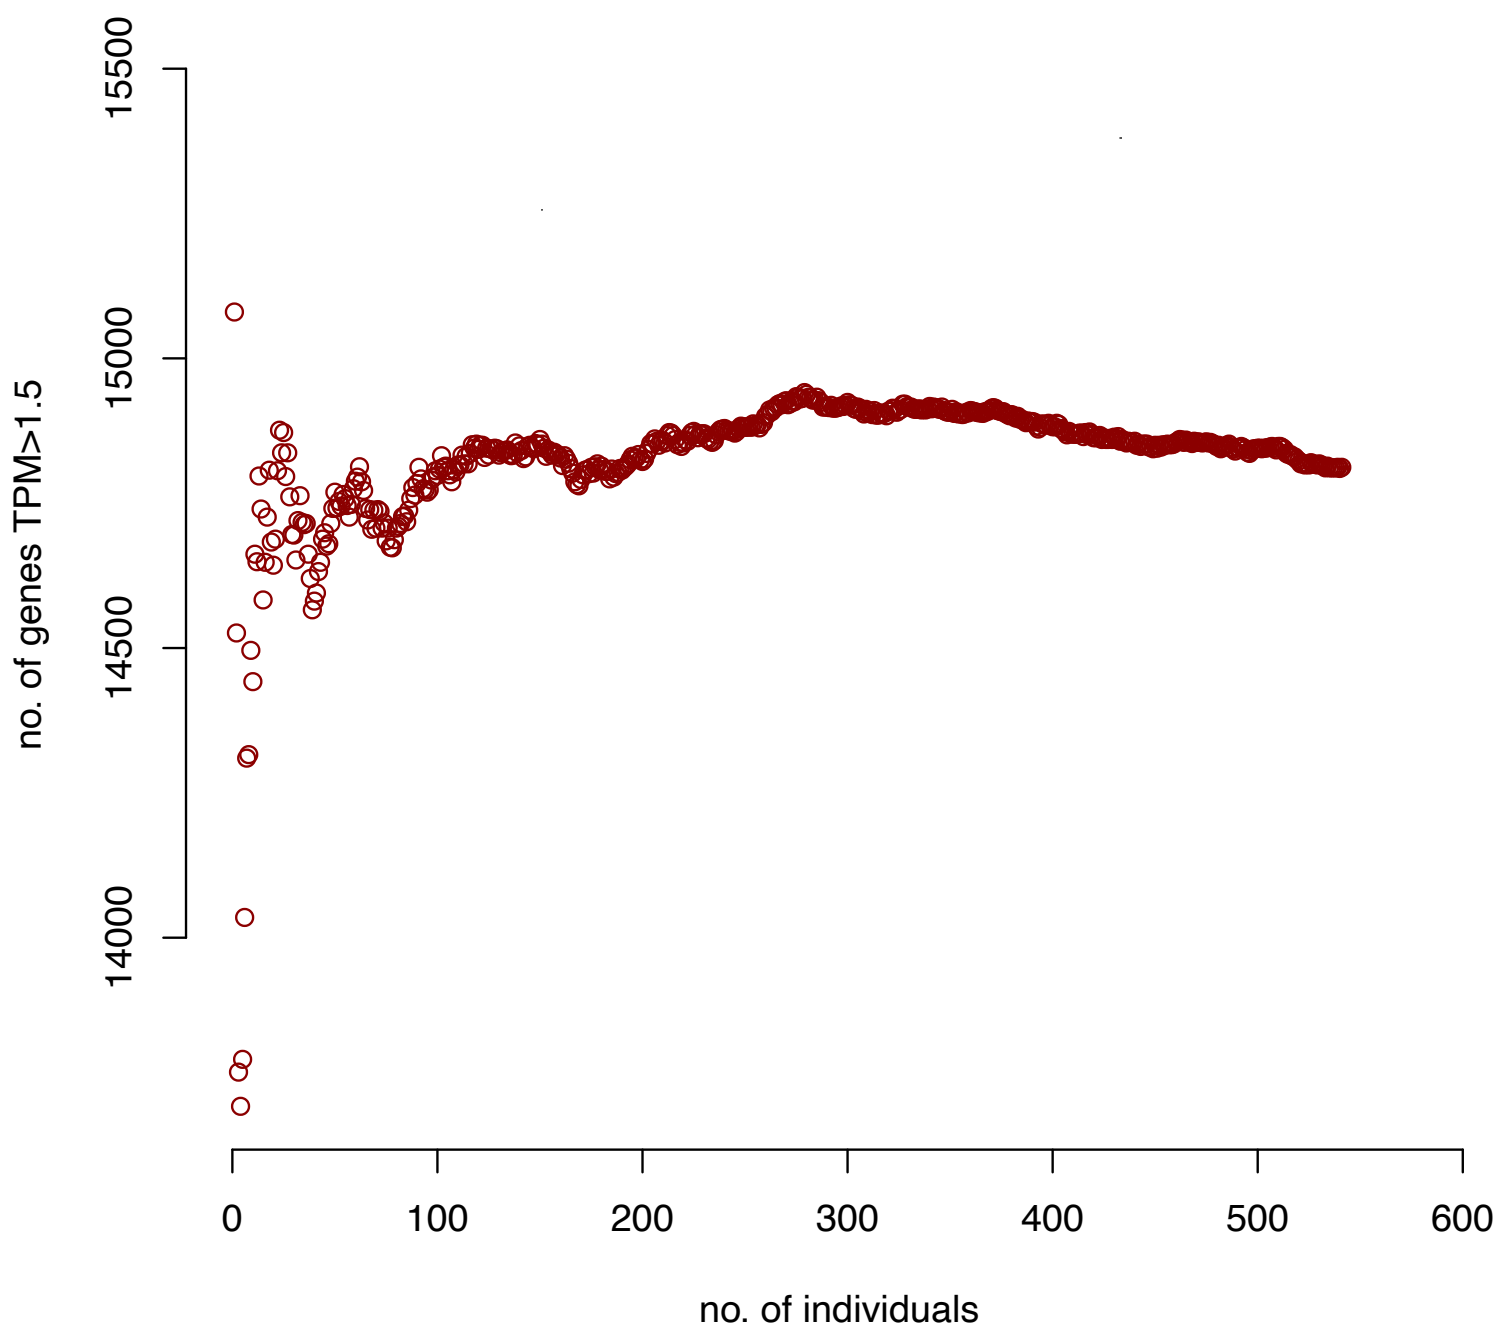

**Gene expression saturation in adrenal gland tissue  
(total number of samples = 258)**

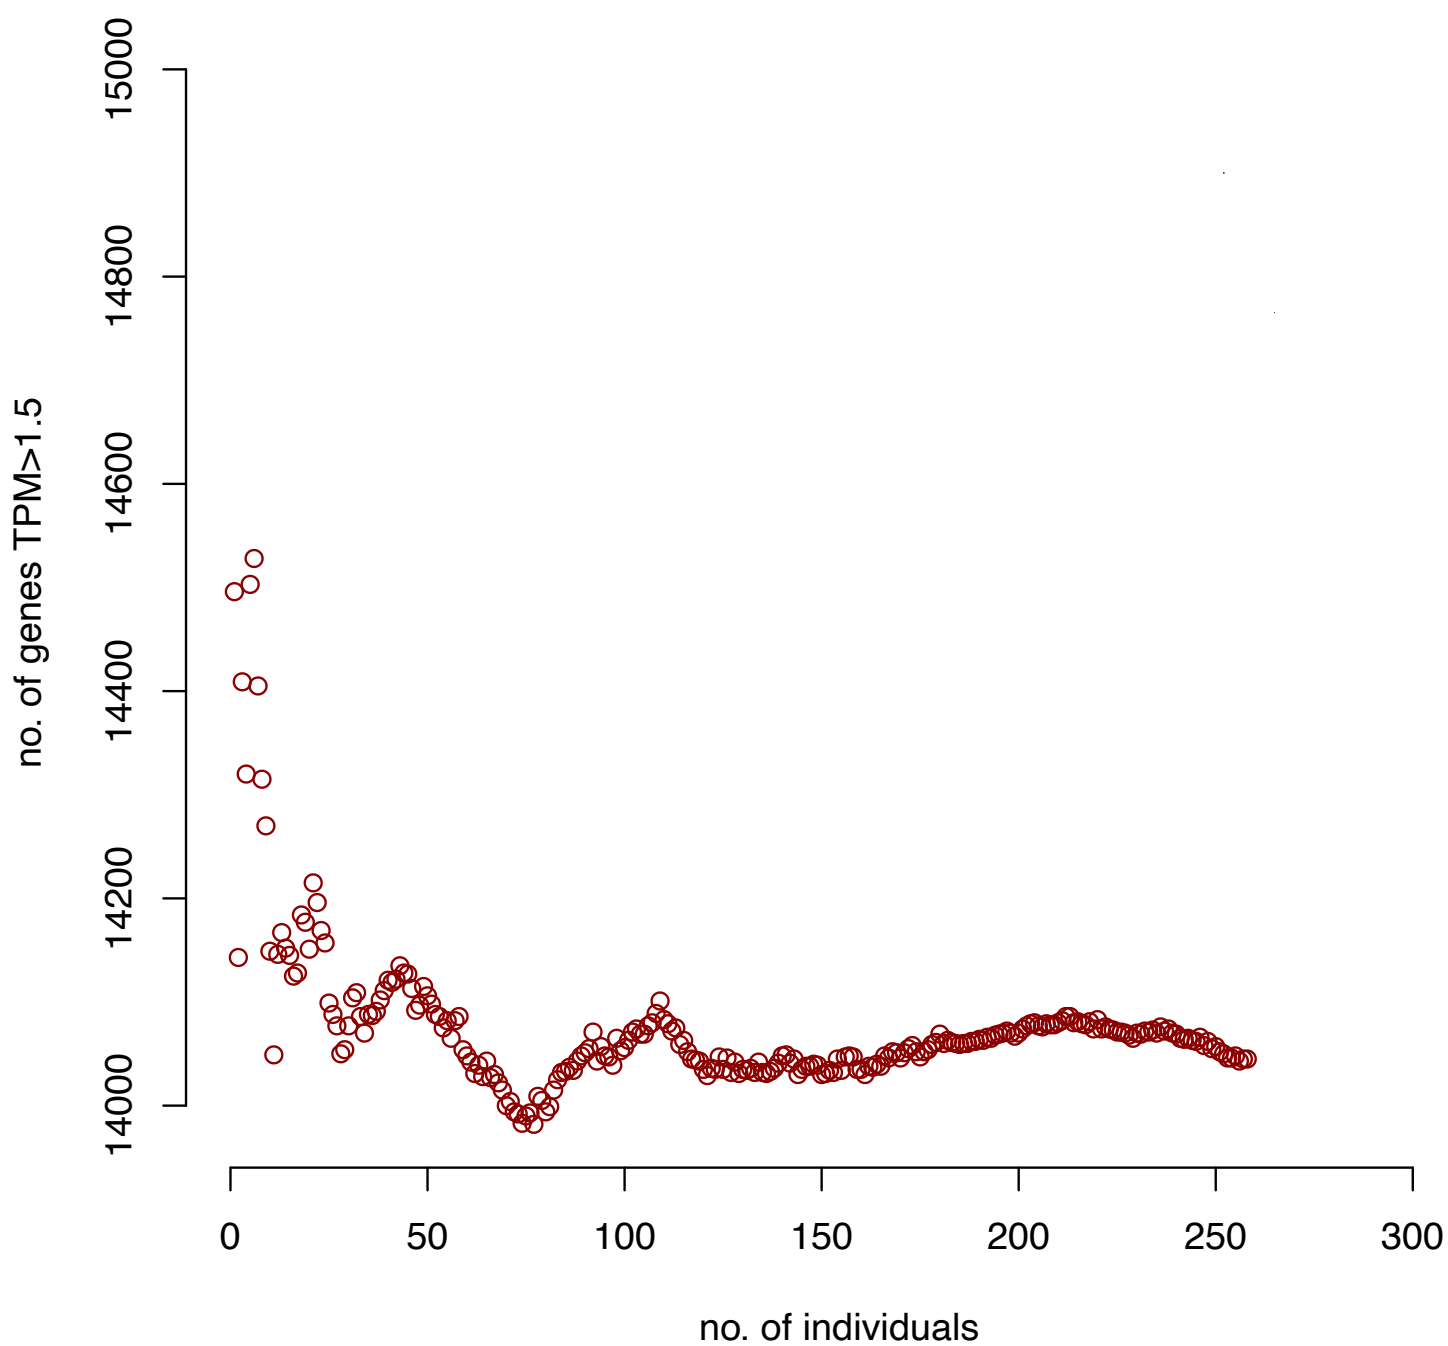

**Gene expression saturation in aorta artery tissue  
(total number of samples = 432)**

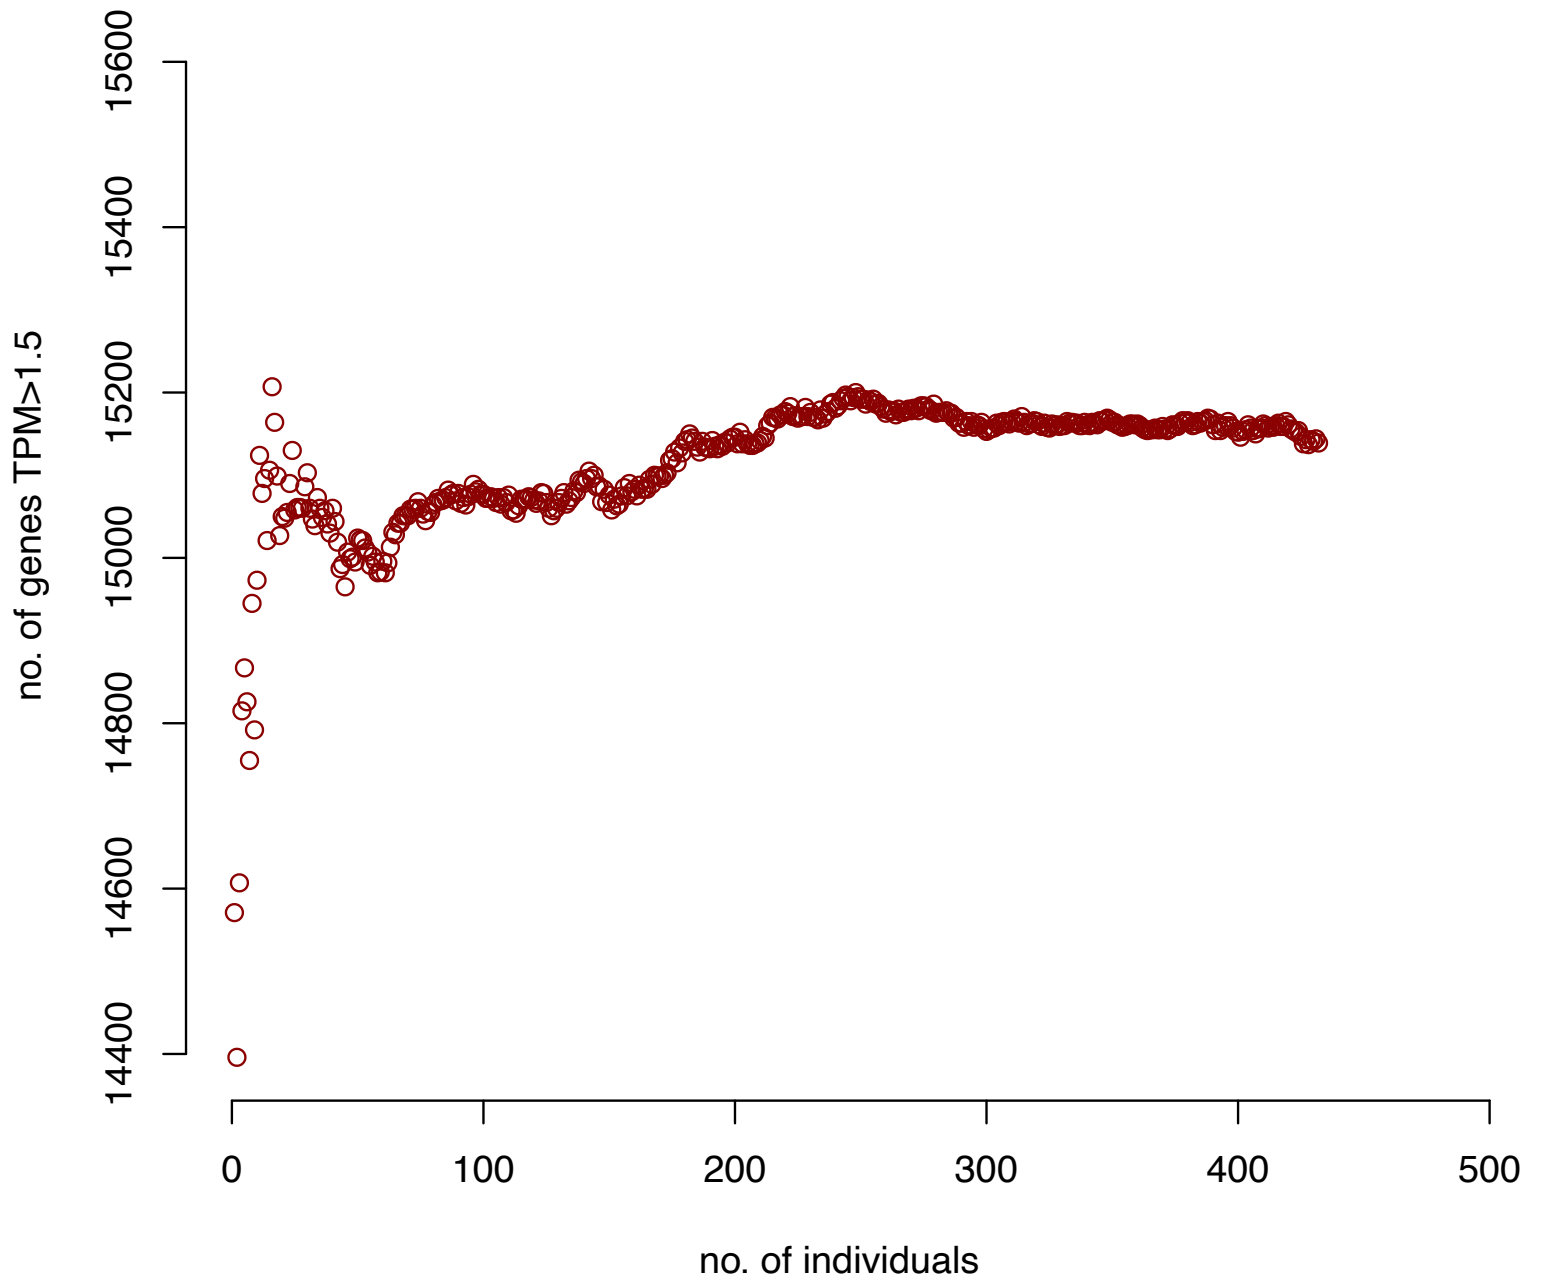

**Gene expression saturation in coronary artery tissue  
(total number of samples = 240)**

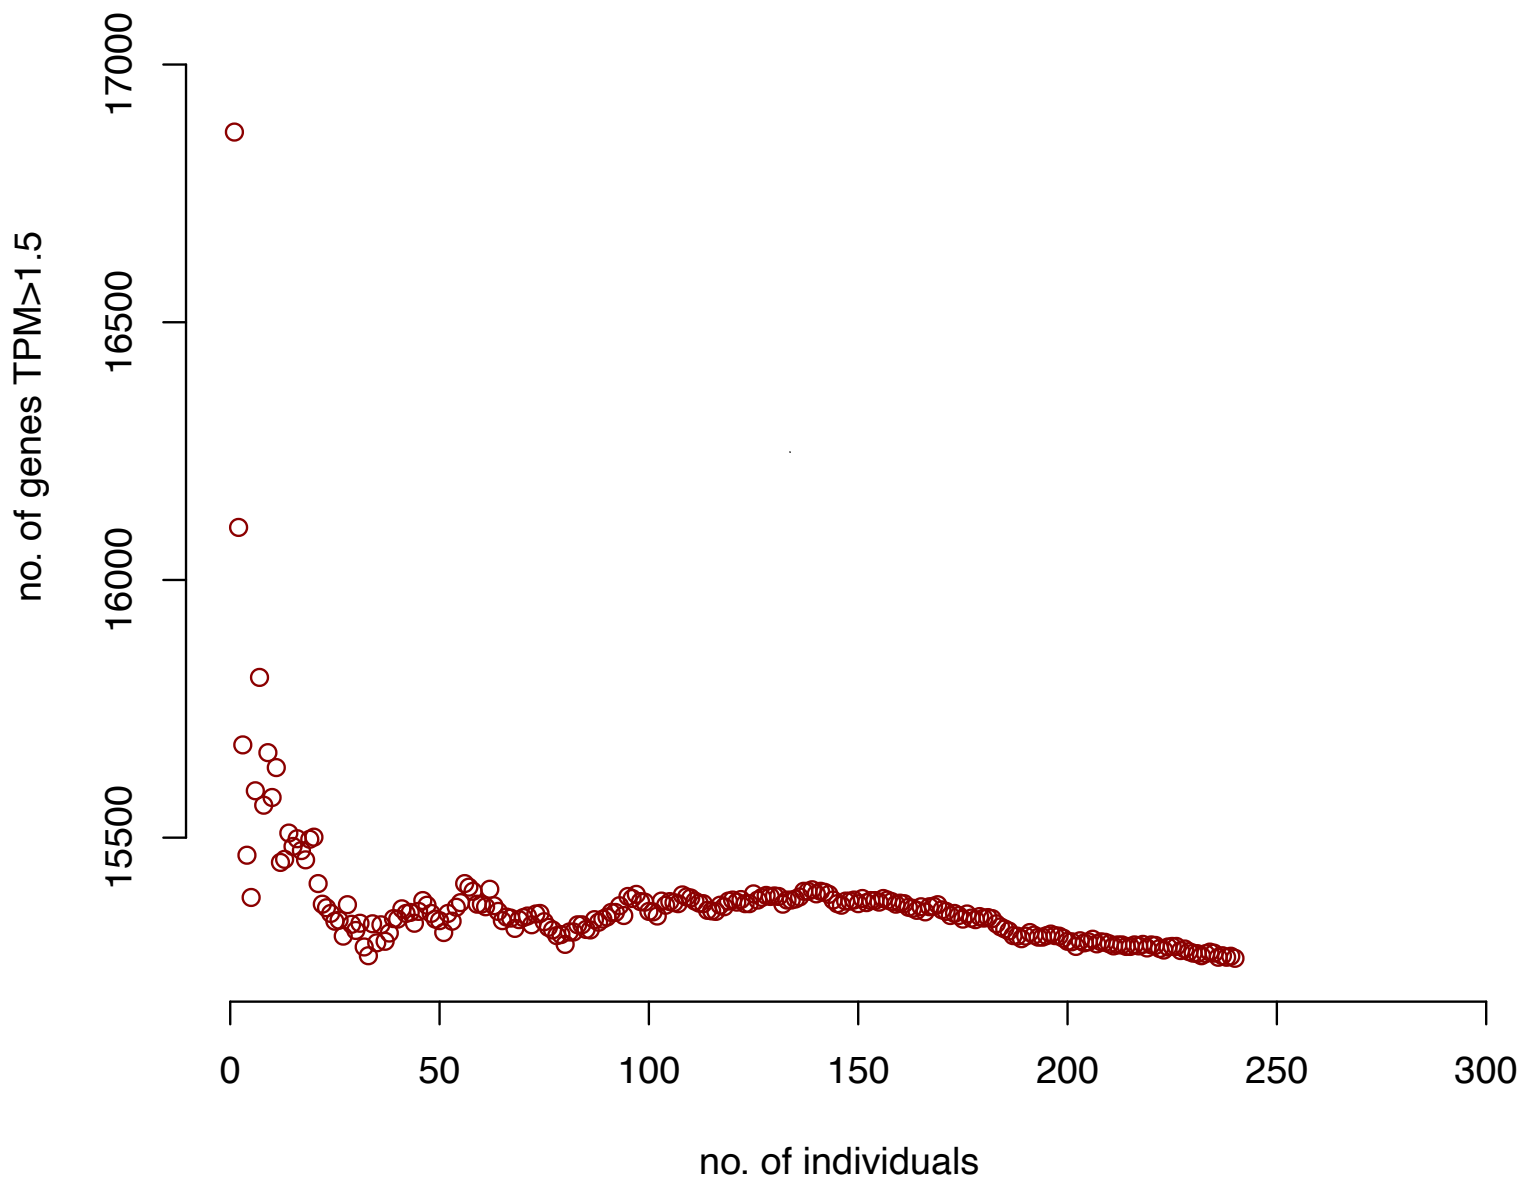

Gene expression saturation in tibial artery tissue  
(total number of samples = 663)

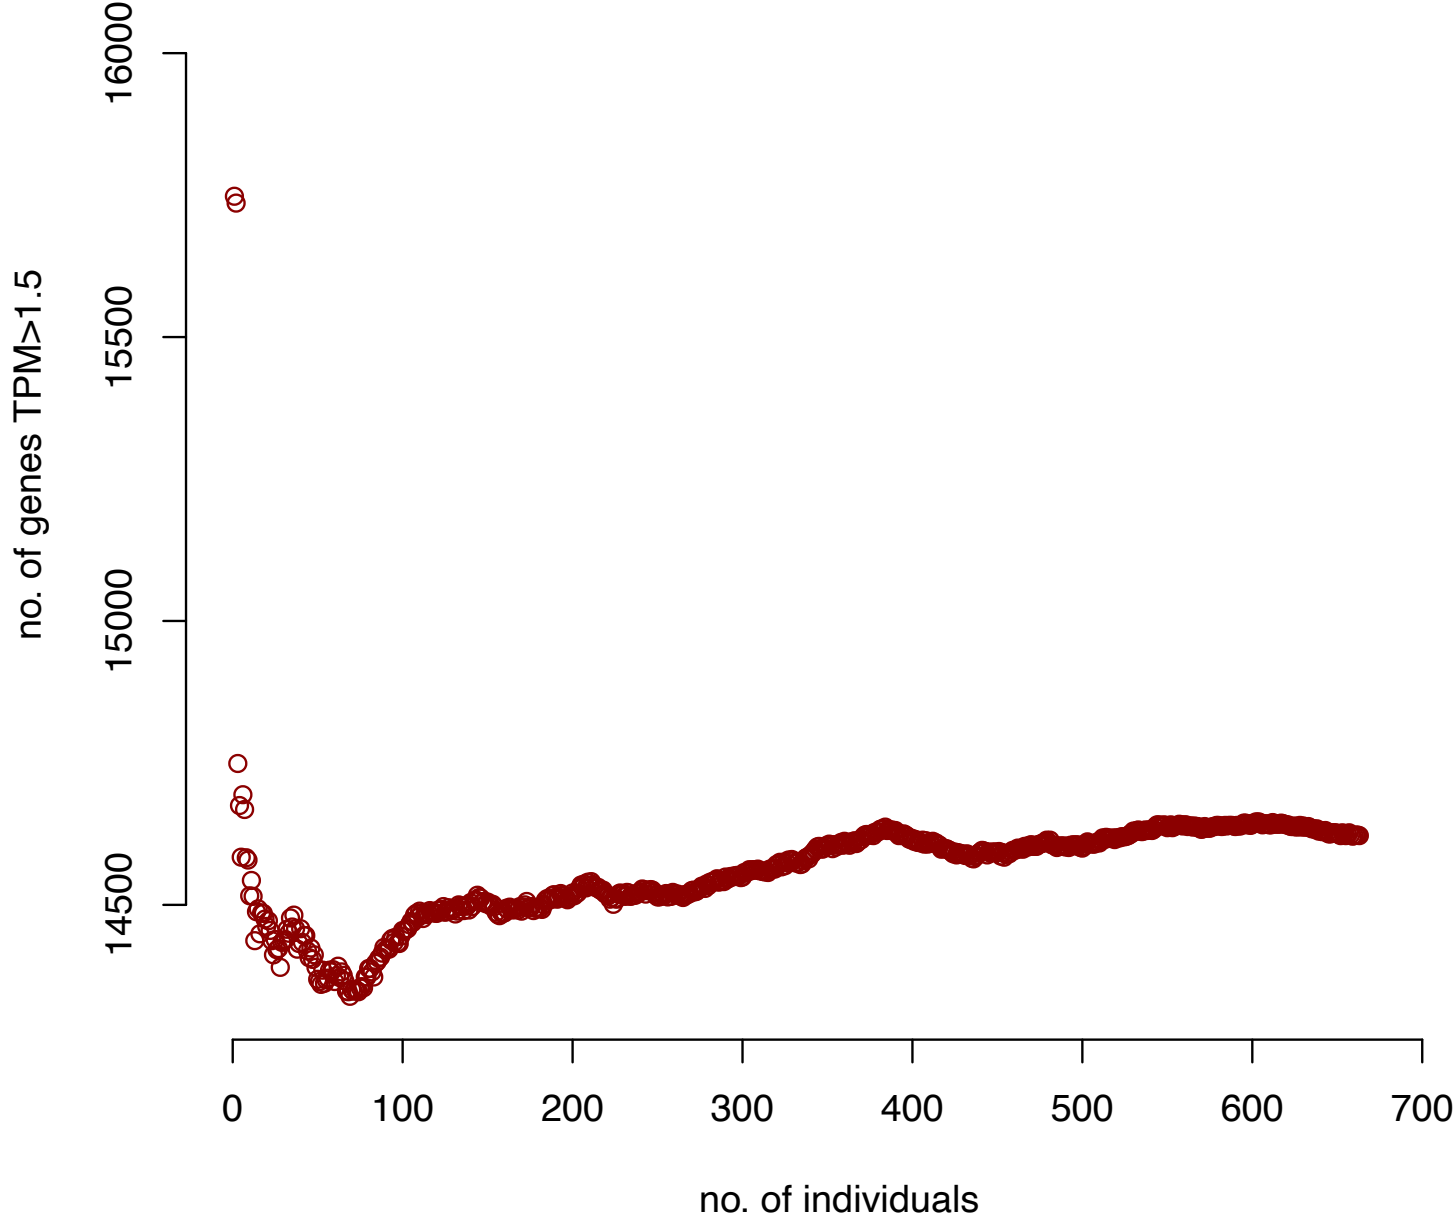

**Gene expression saturation in bladder tissue  
(total number of samples = 21)**

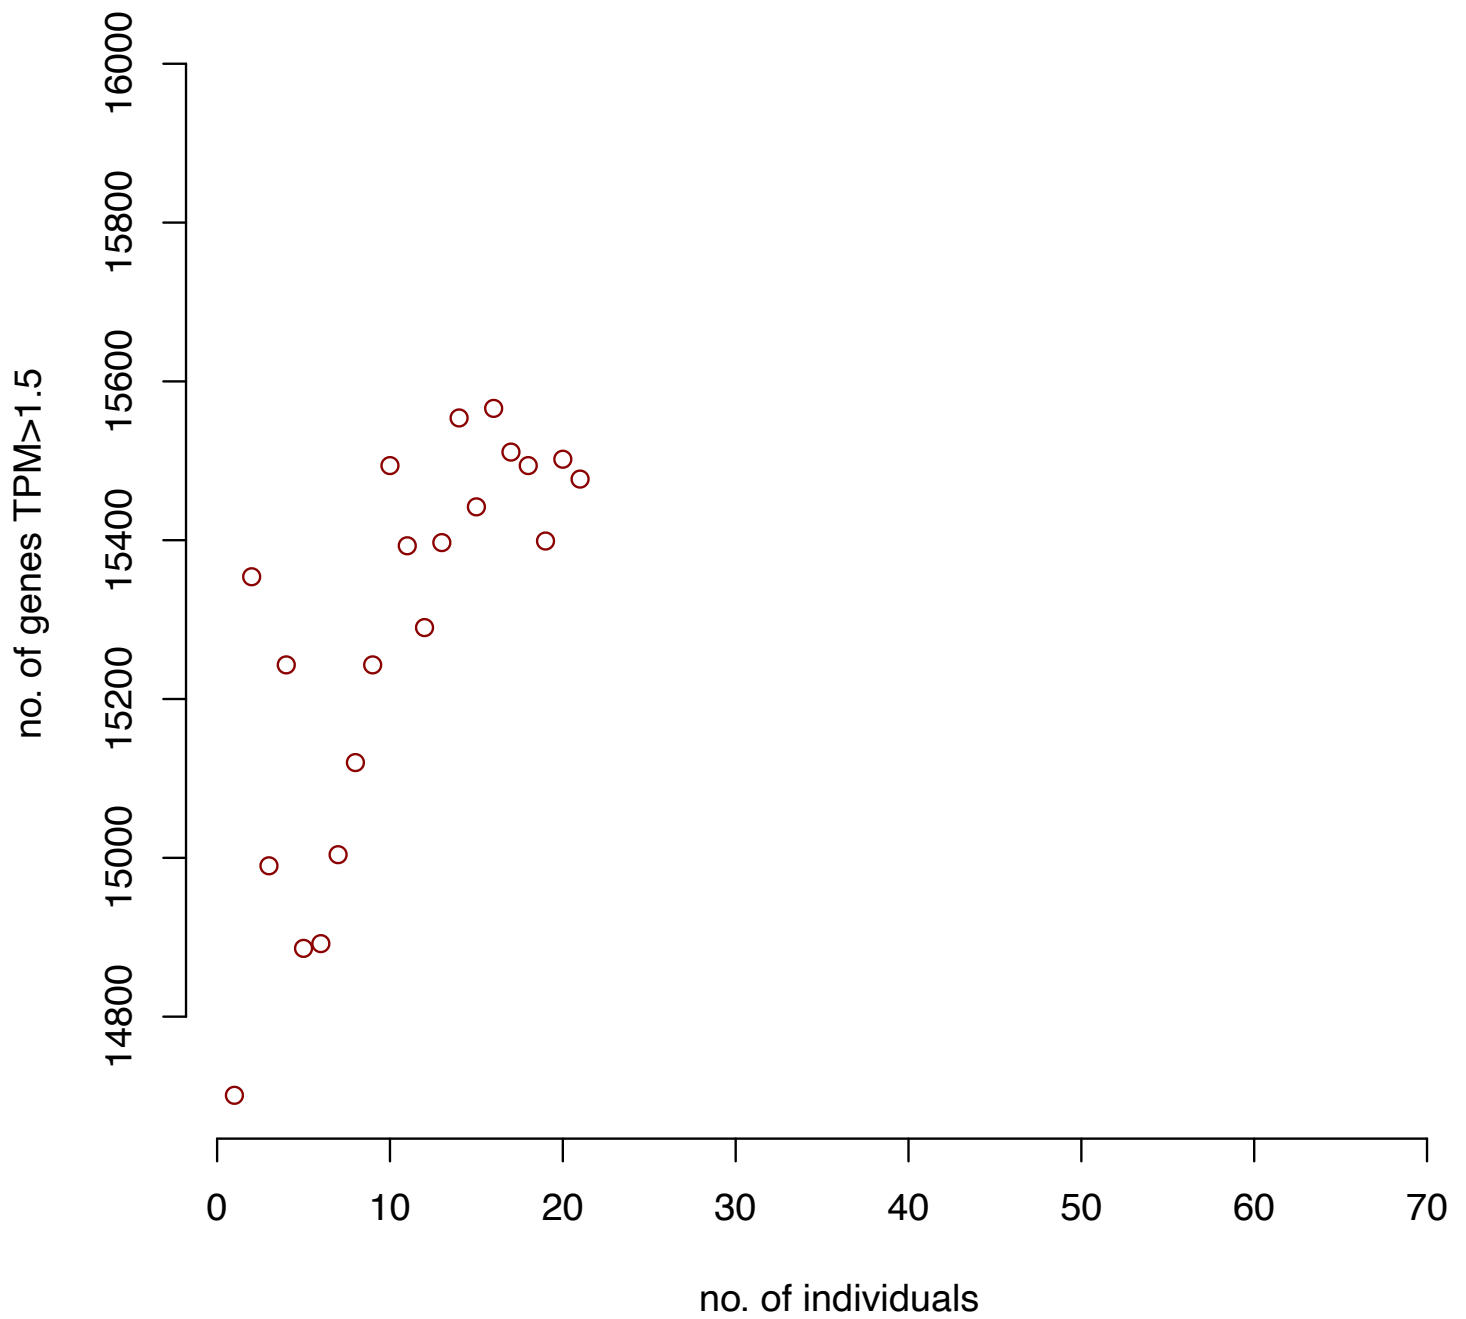

**Gene expression saturation in brain – amygdala tissue  
(total number of samples = 152)**

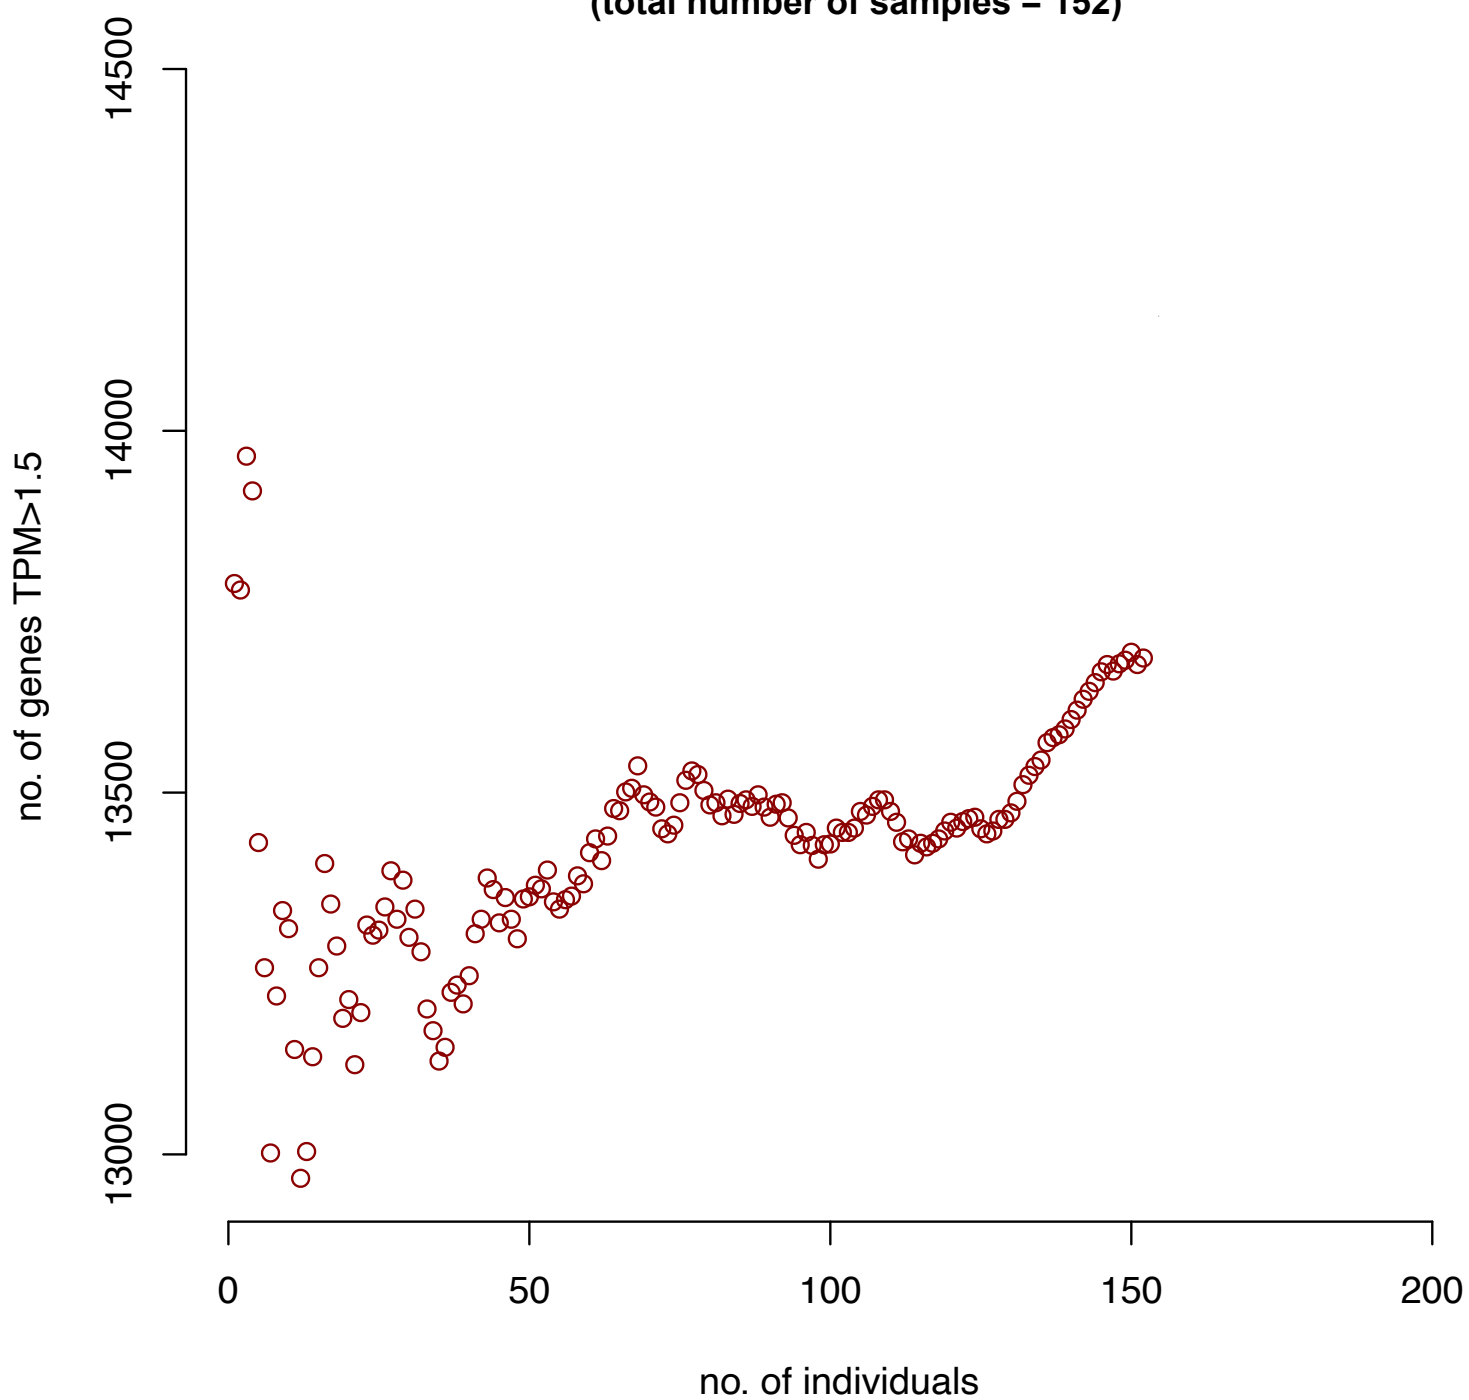

**Gene expression saturation in brain – anterior cingulate cortex (BA24) tissue  
(total number of samples = 176)**

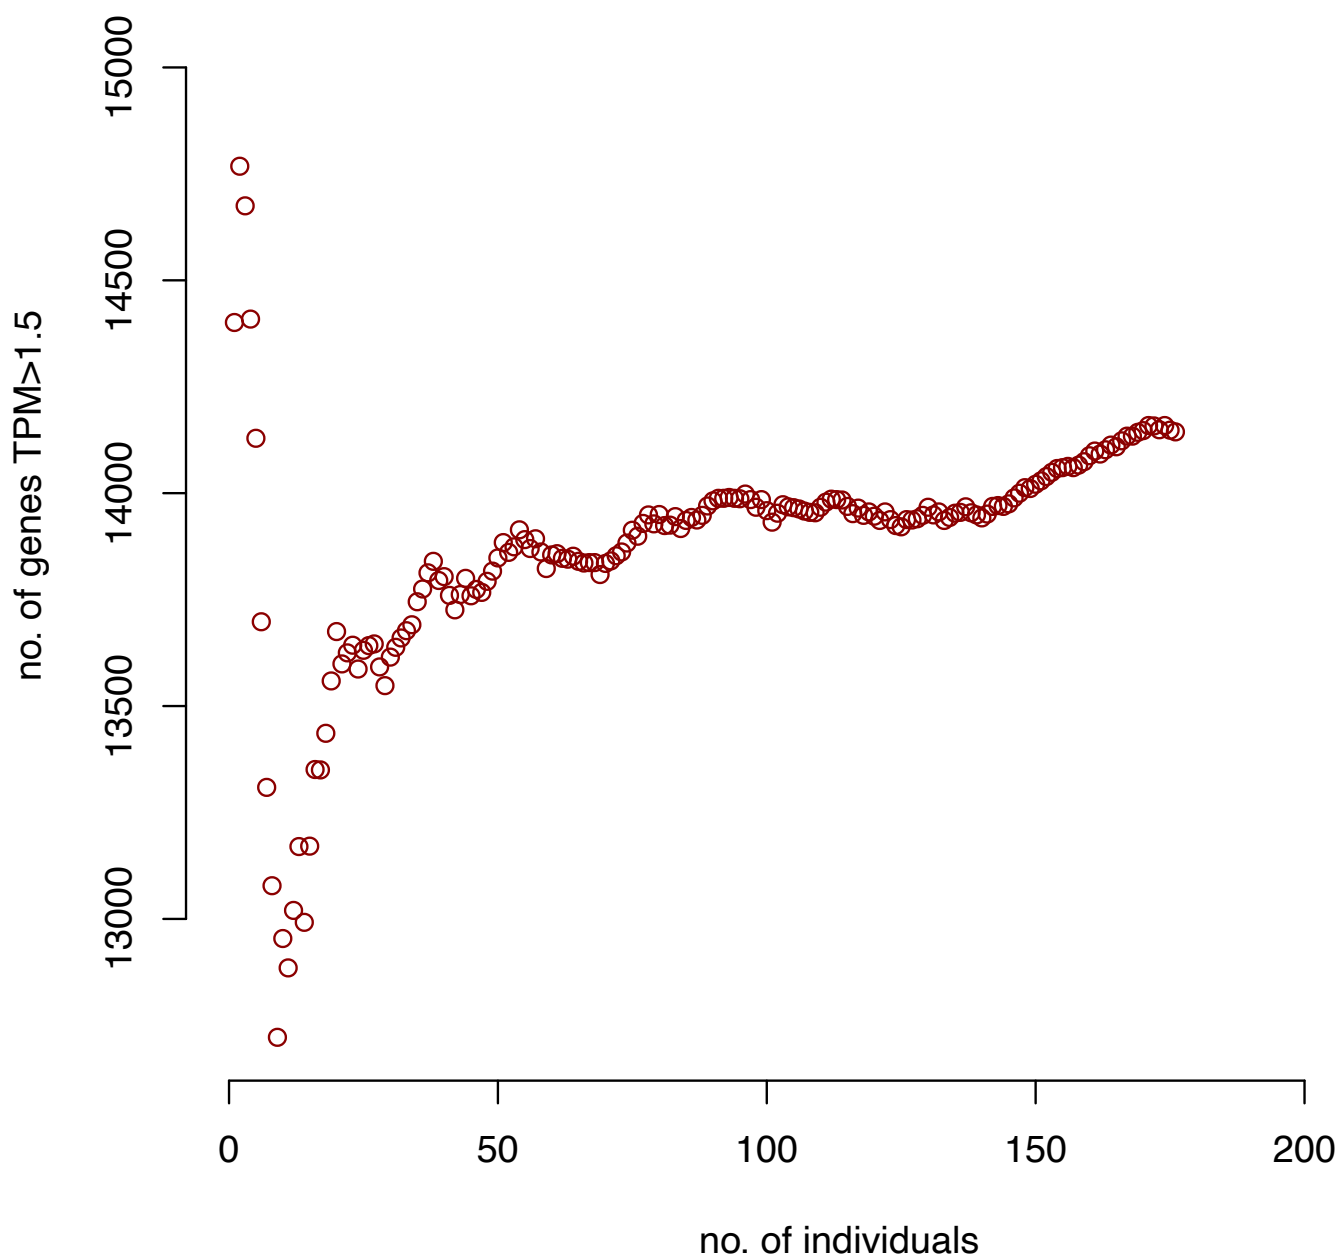

Gene expression saturation in brain – caudate (basal ganglia) tissue  
(total number of samples = 246)

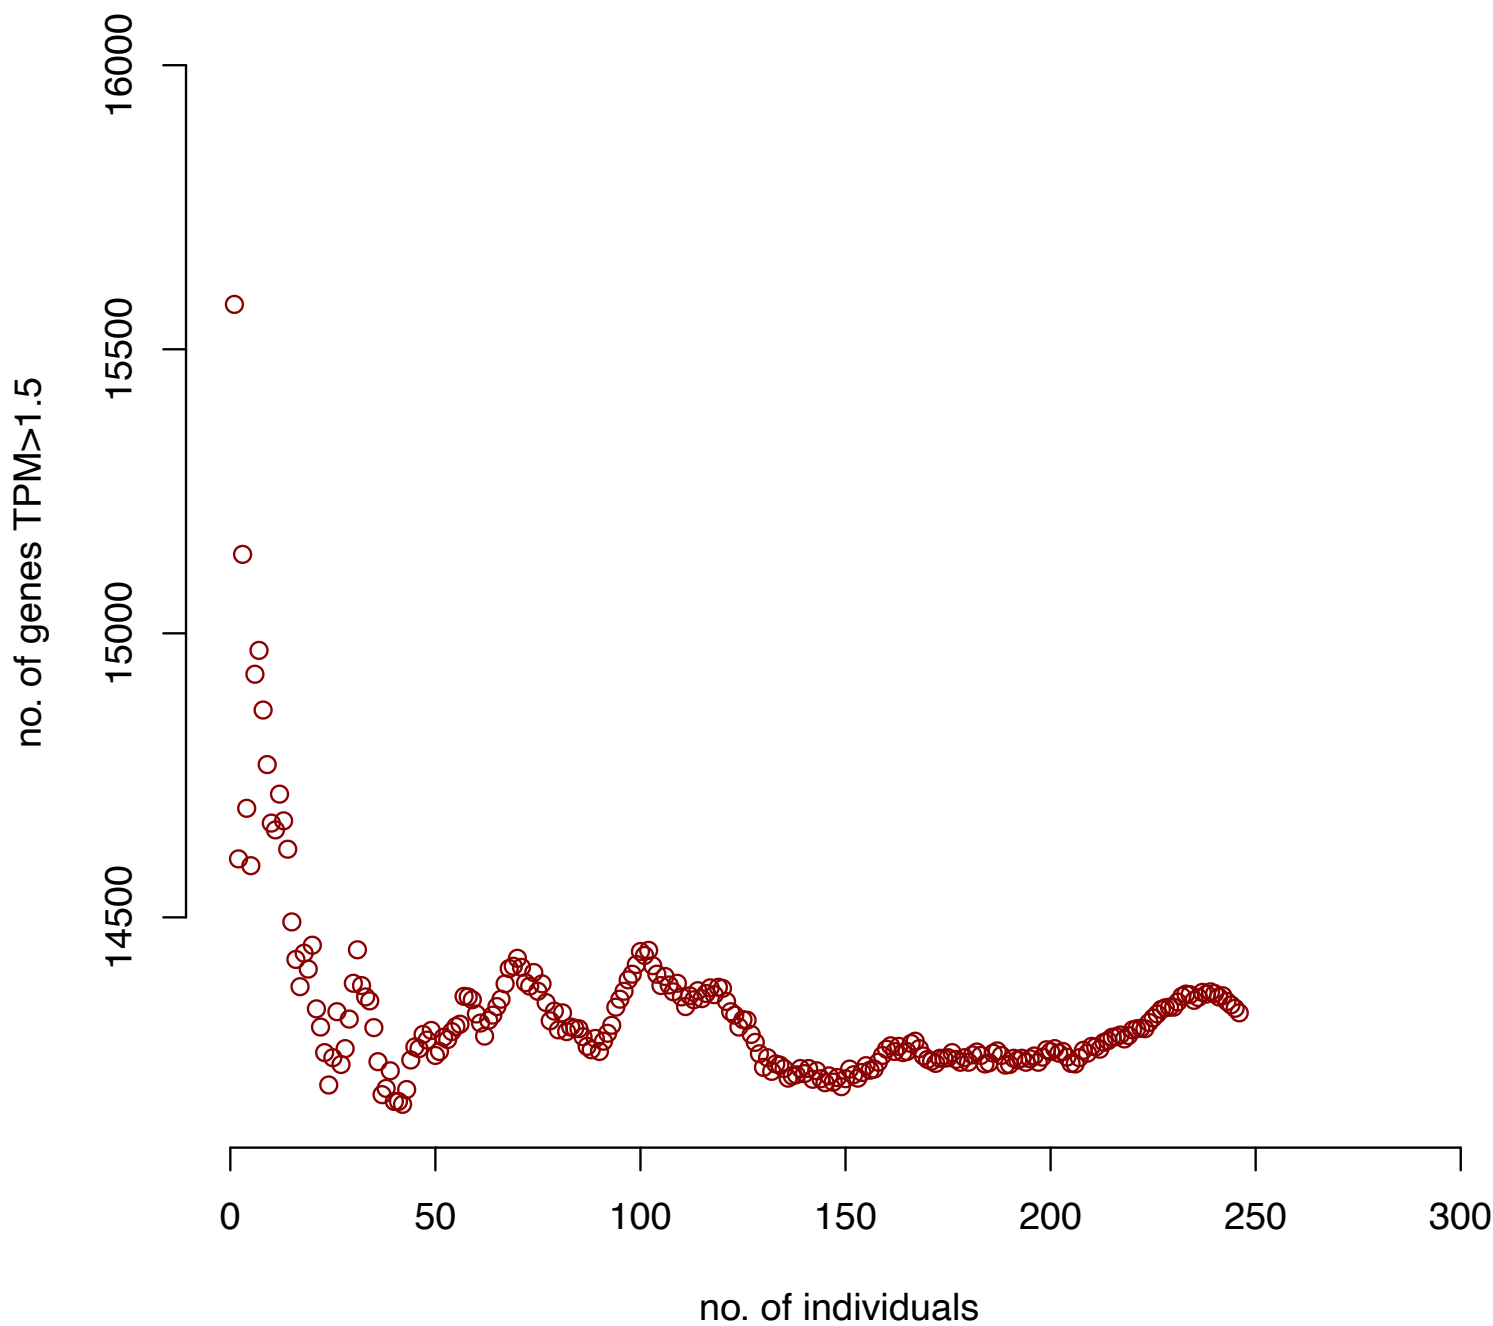

**Gene expression saturation in cerebellar hemisphere tissue  
(total number of samples = 215)**

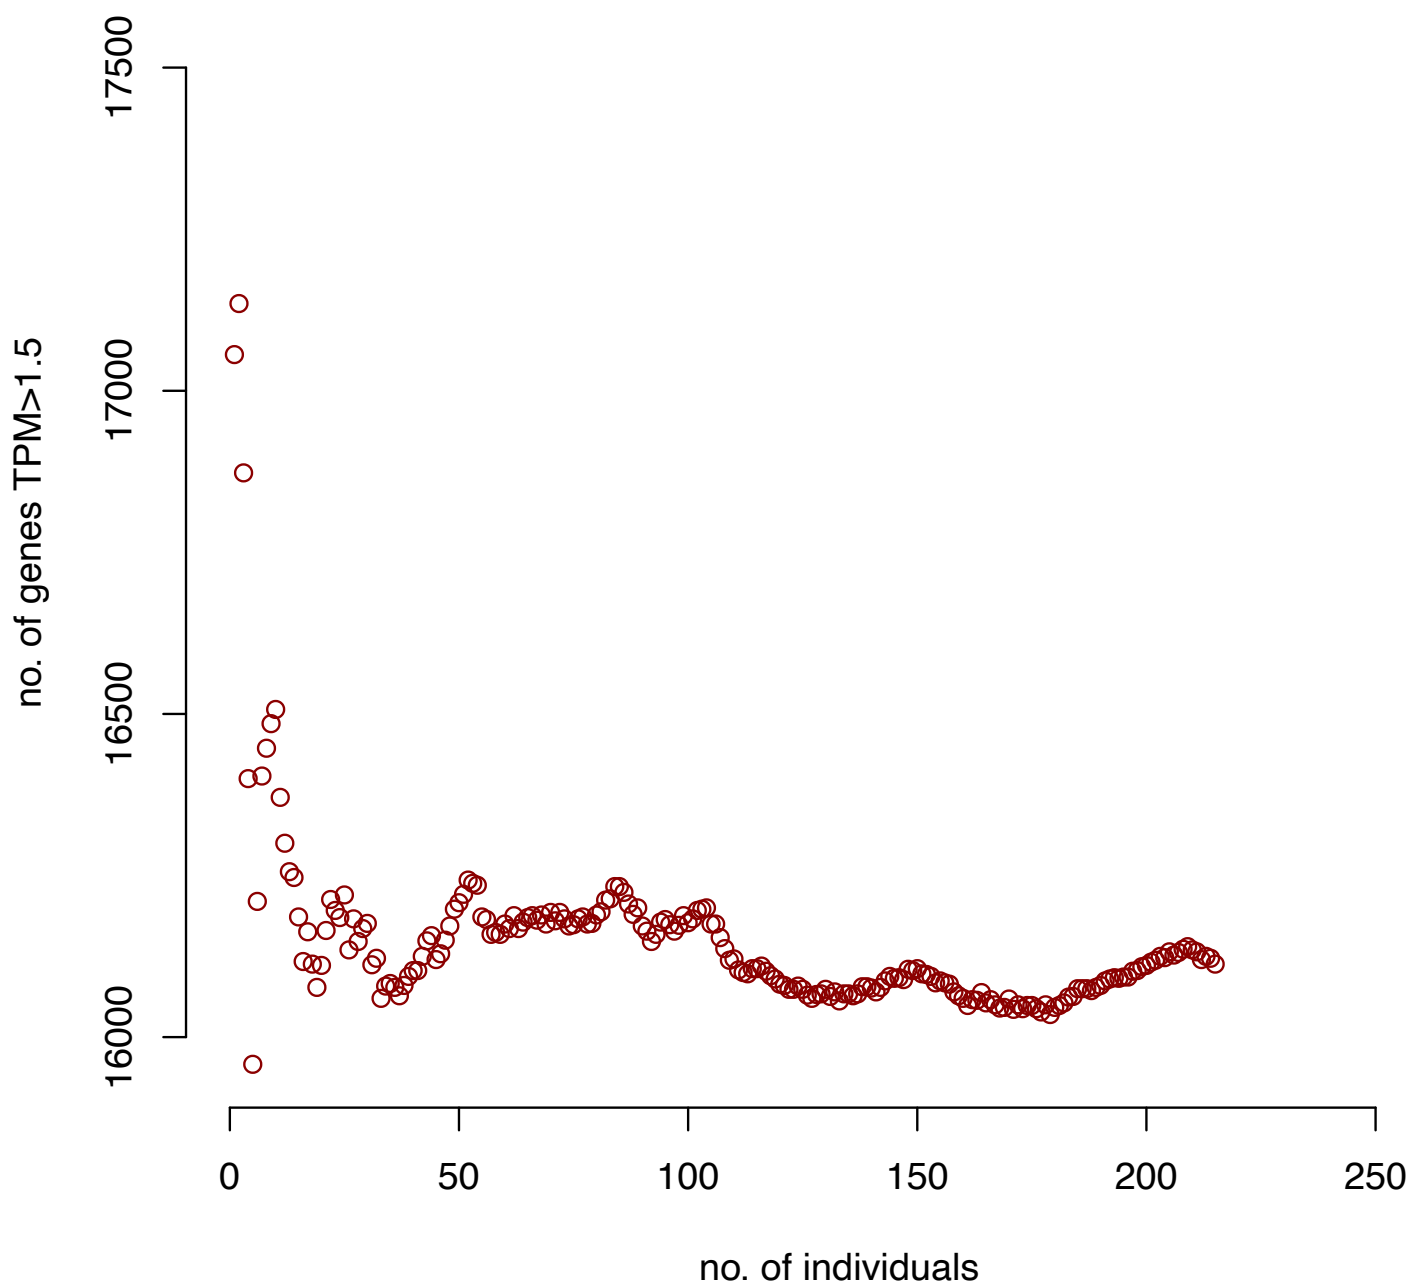

**Gene expression saturation in cerebellum tissue  
(total number of samples = 241)**

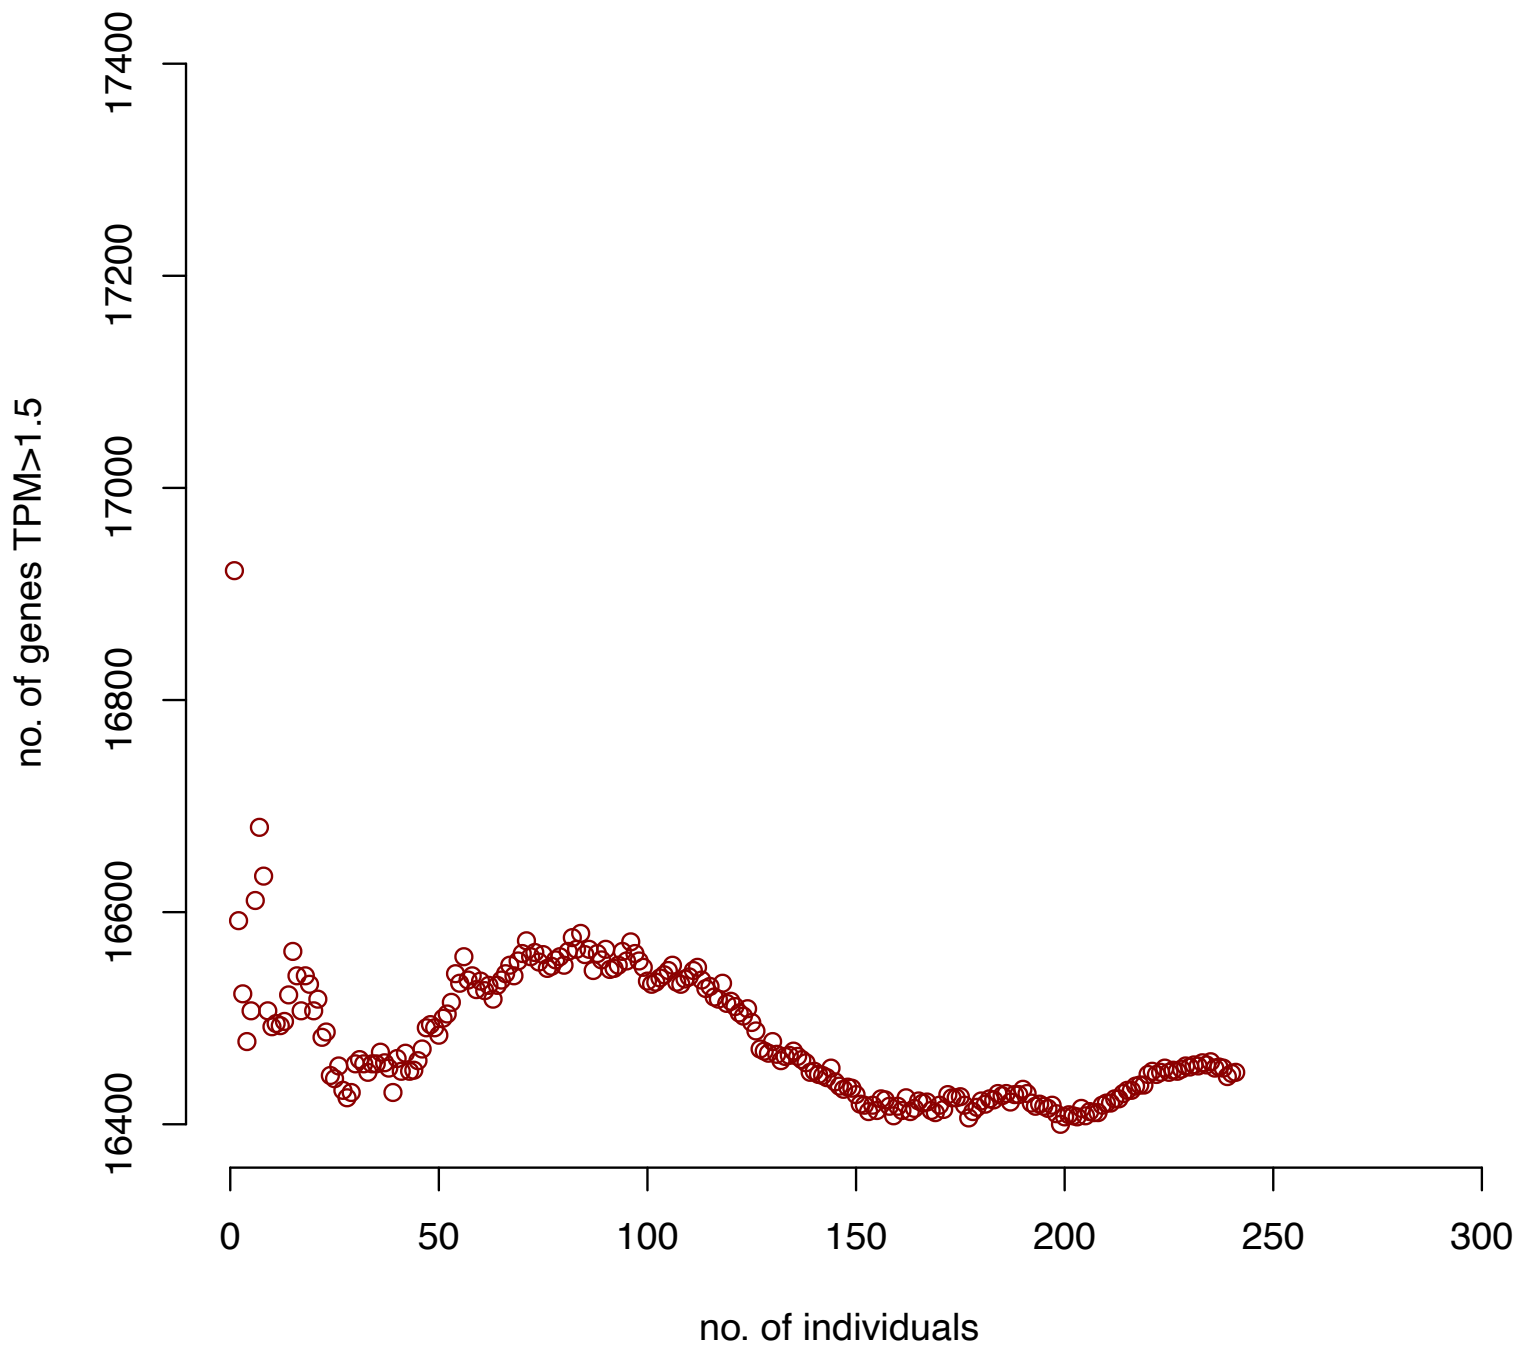

**Gene expression saturation in brain cortex tissue  
(total number of samples = 255)**

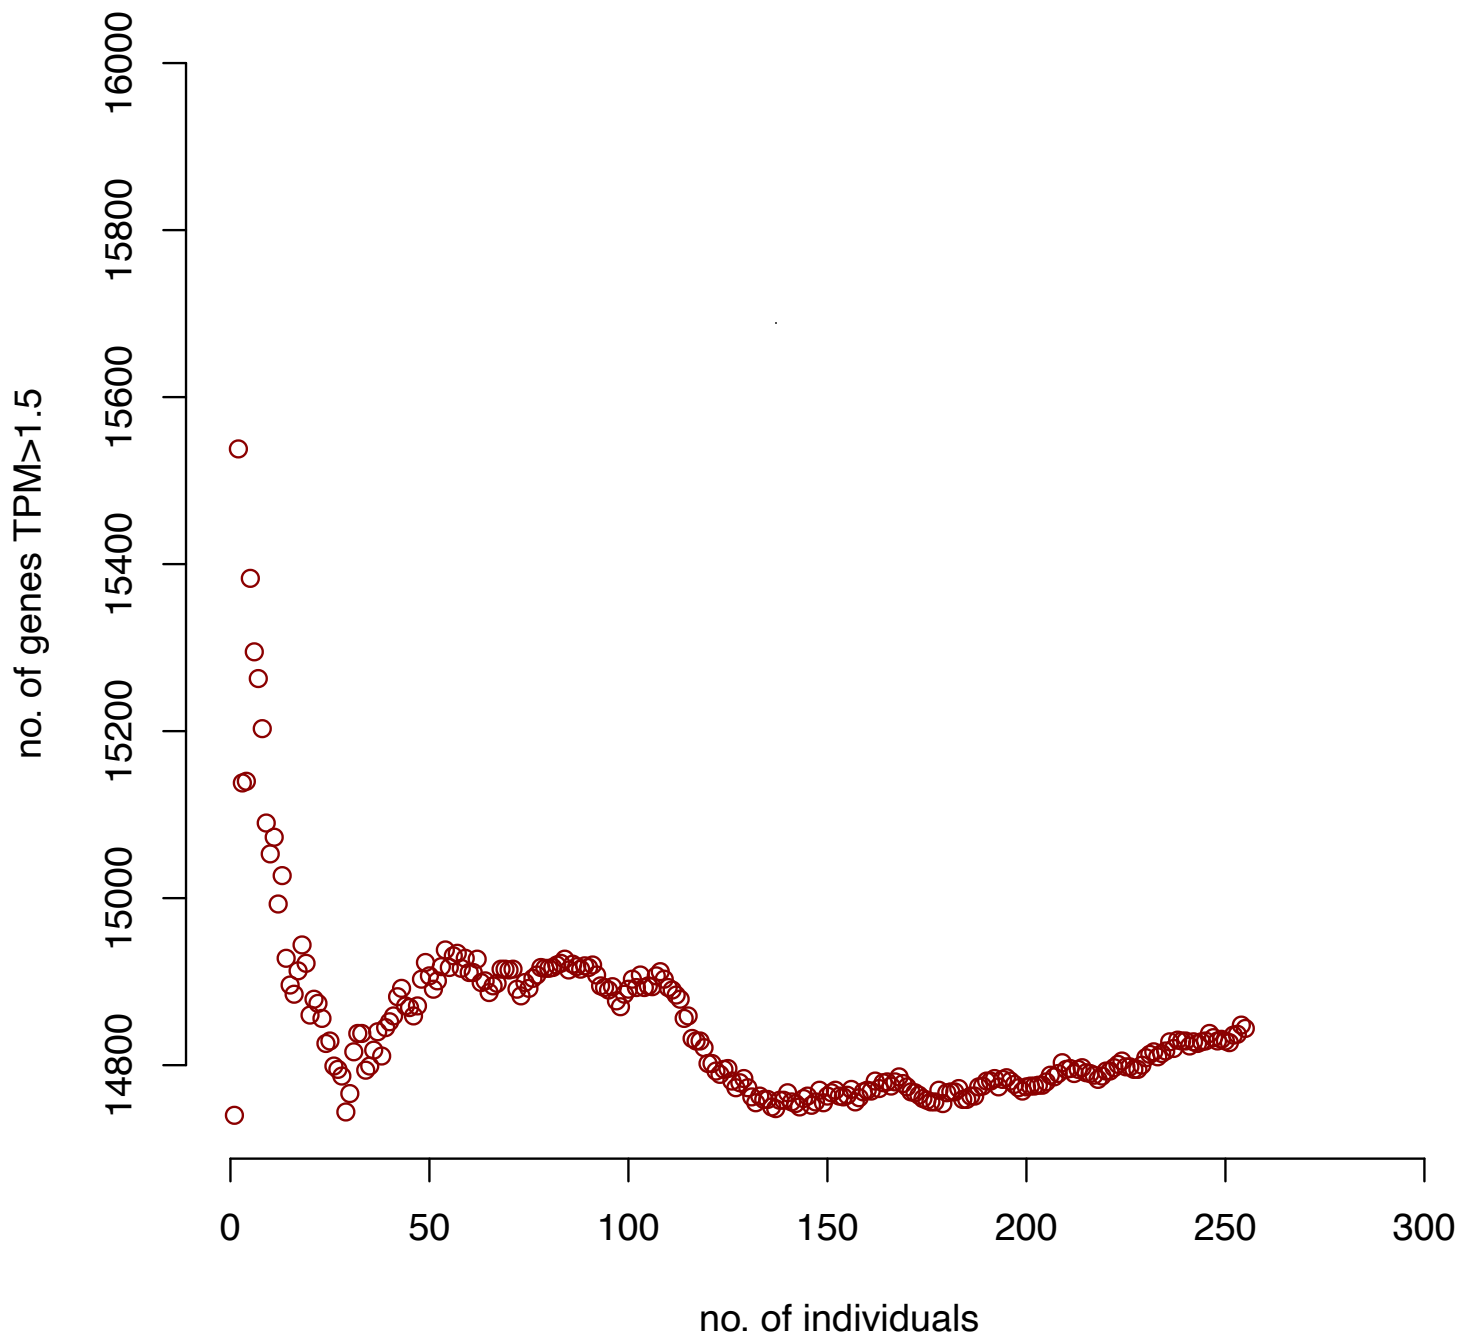

**Gene expression saturation in brain frontal cortex (BA9) tissue  
(total number of samples = 209)**

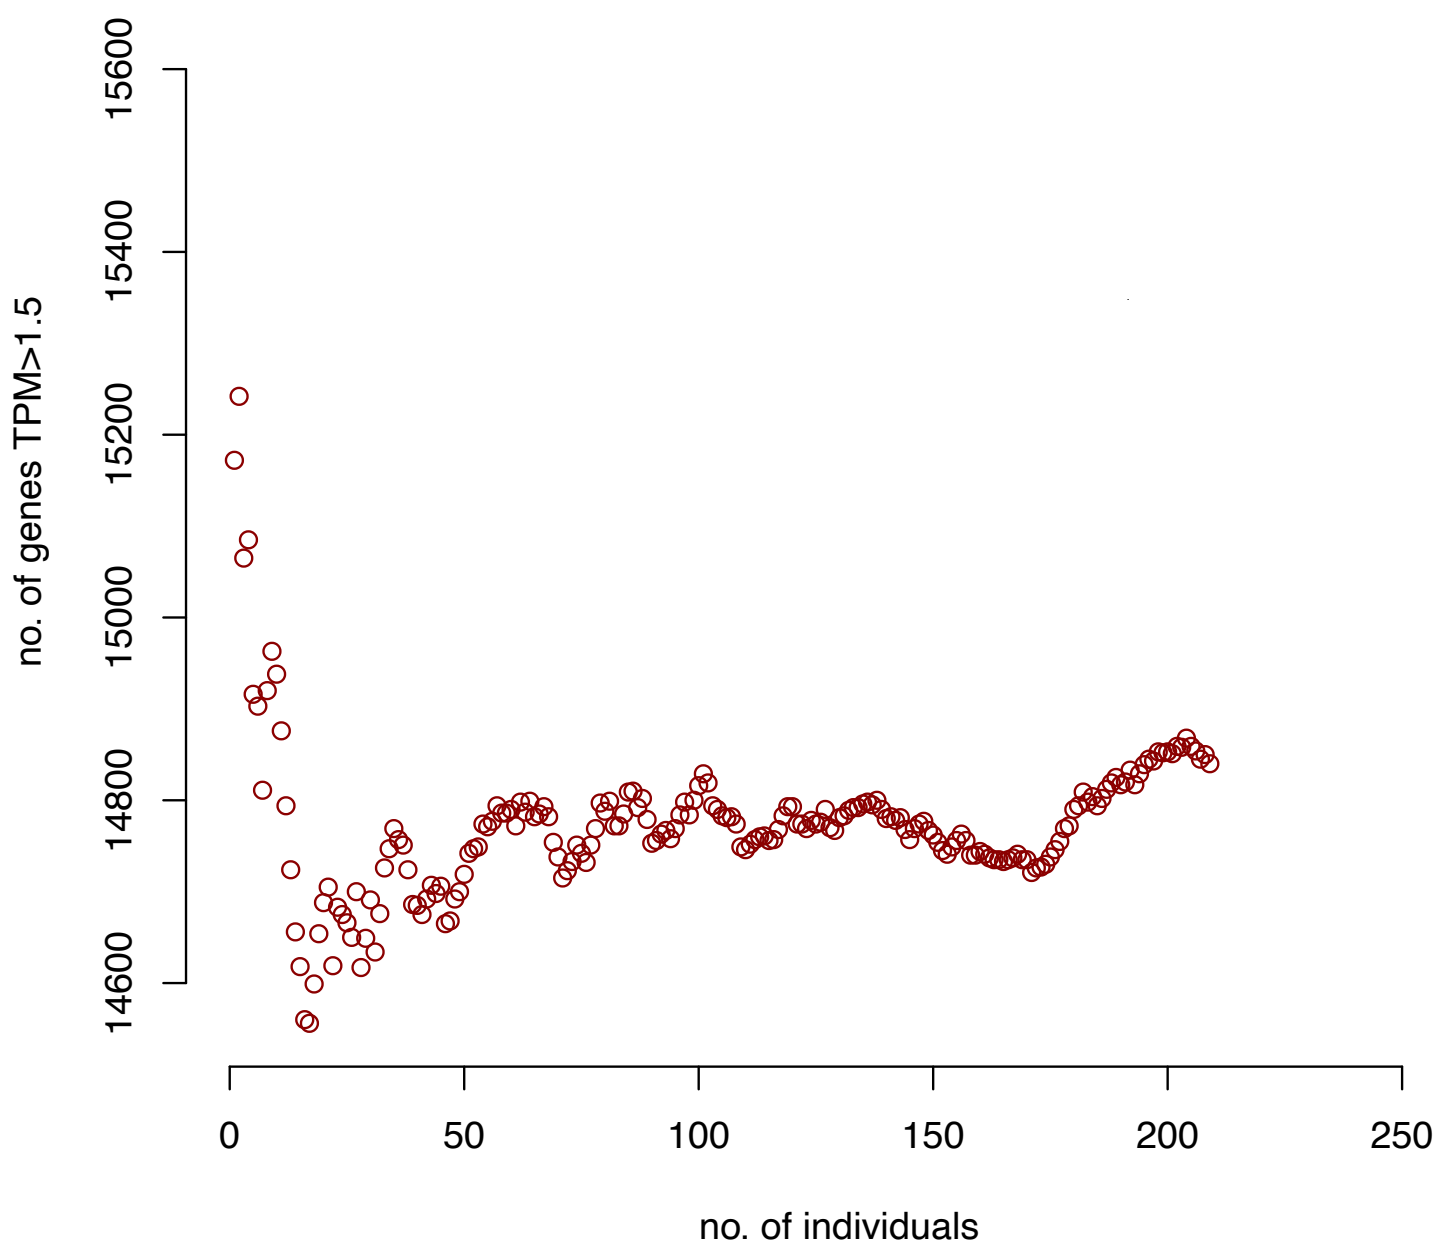

**Gene expression saturation in brain hippocampus tissue  
(total number of samples = 197)**

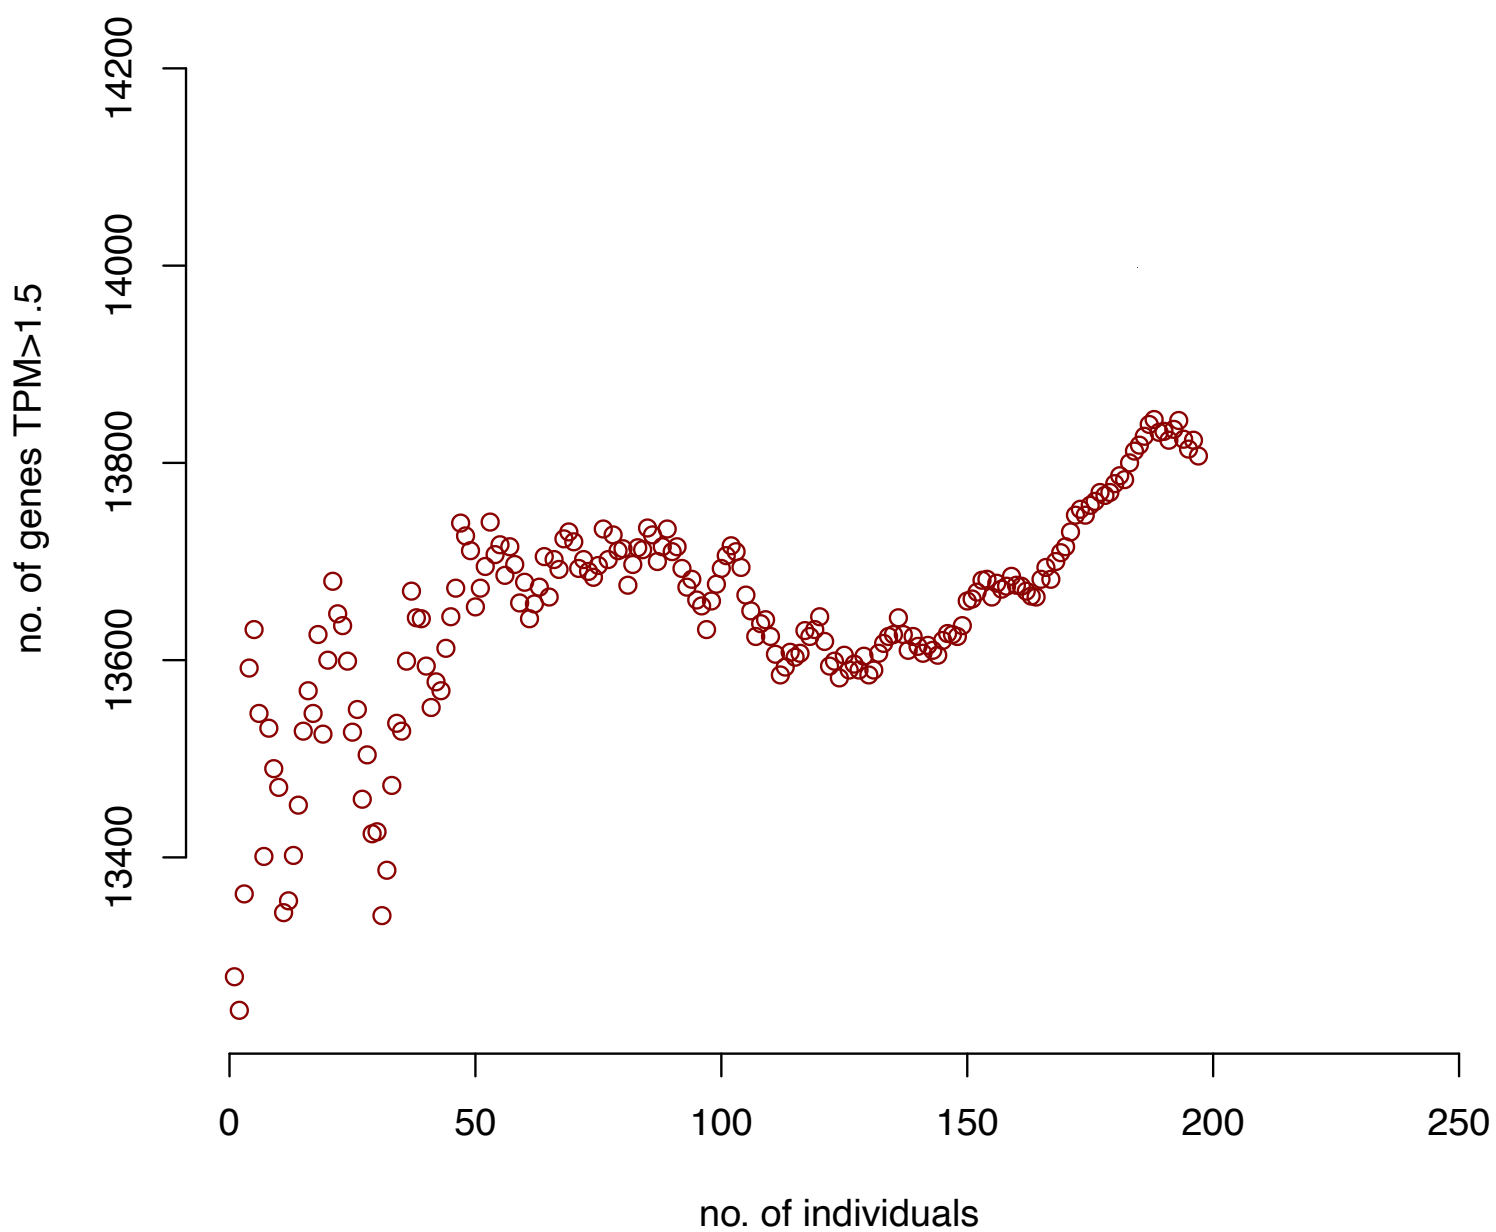

**Gene expression saturation in brain hypothalamus tissue  
(total number of samples = 202)**

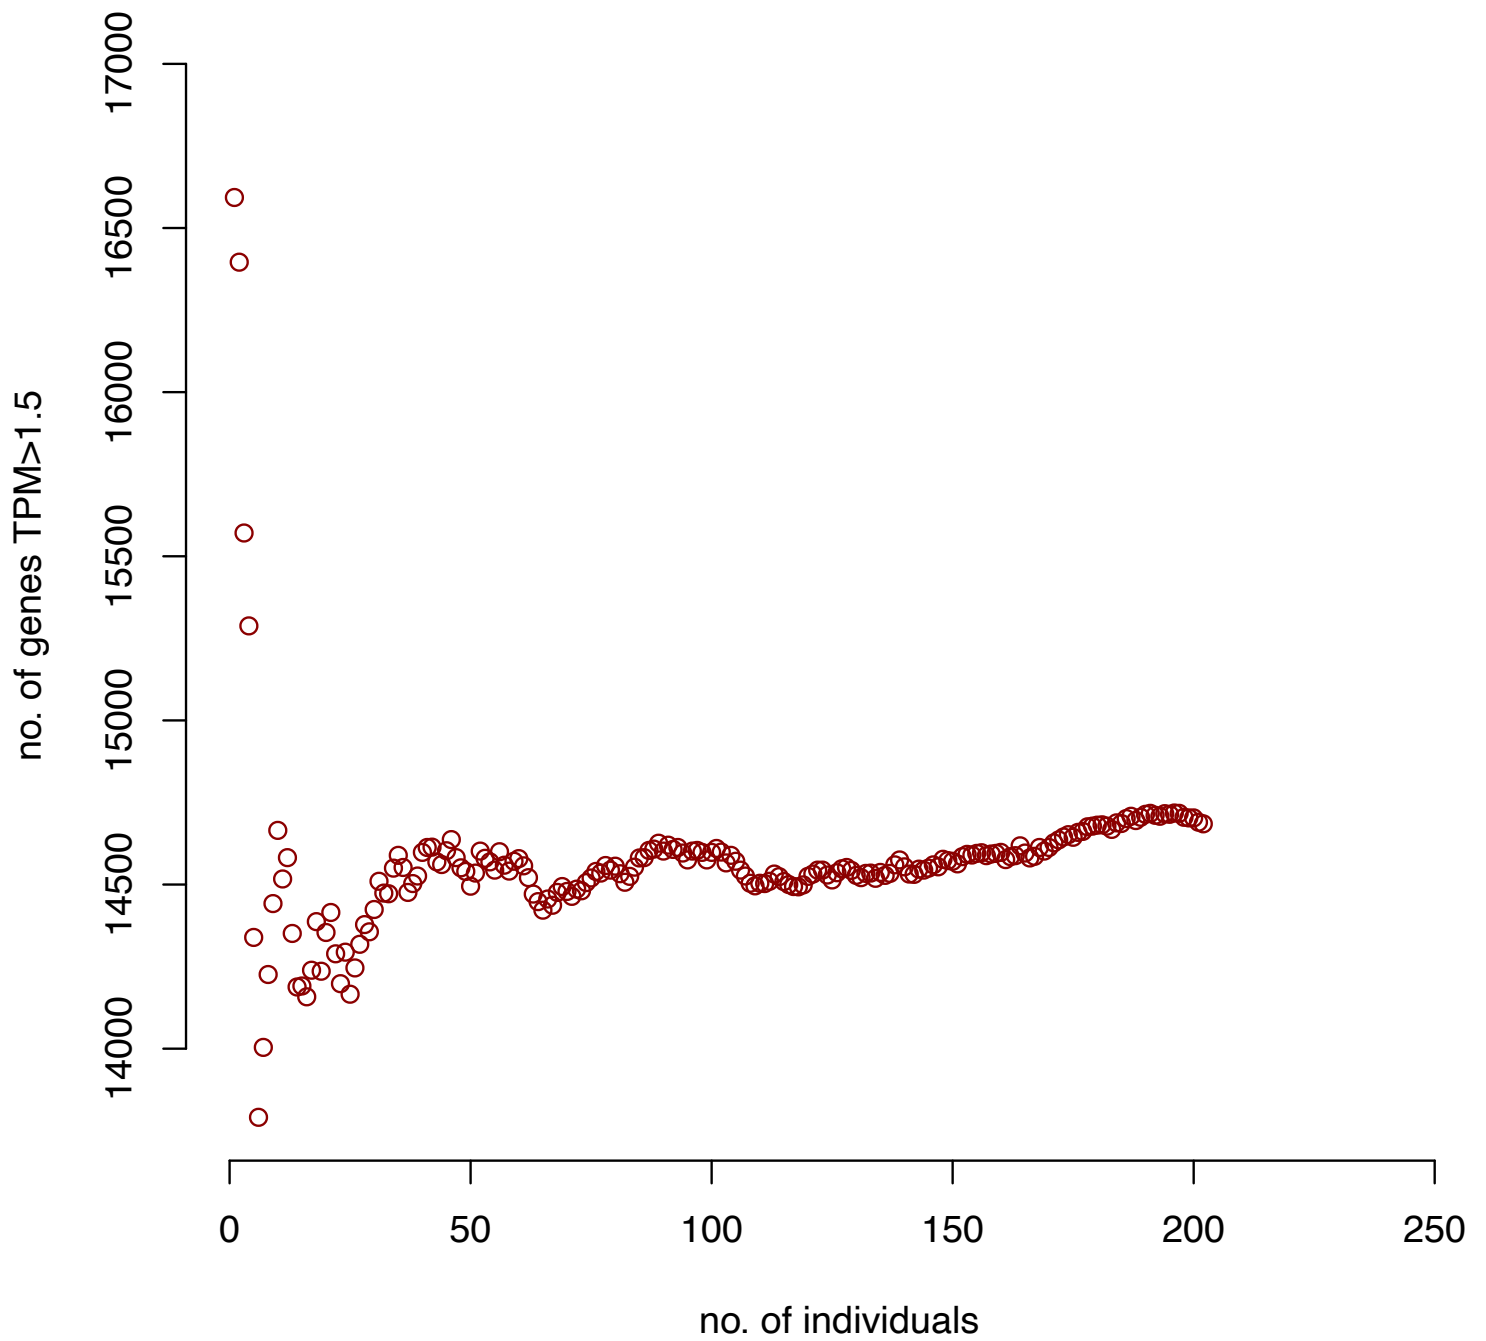

Gene expression saturation in brain nucleus accumbens (basal ganglia) tissue  
(total number of samples = 246)

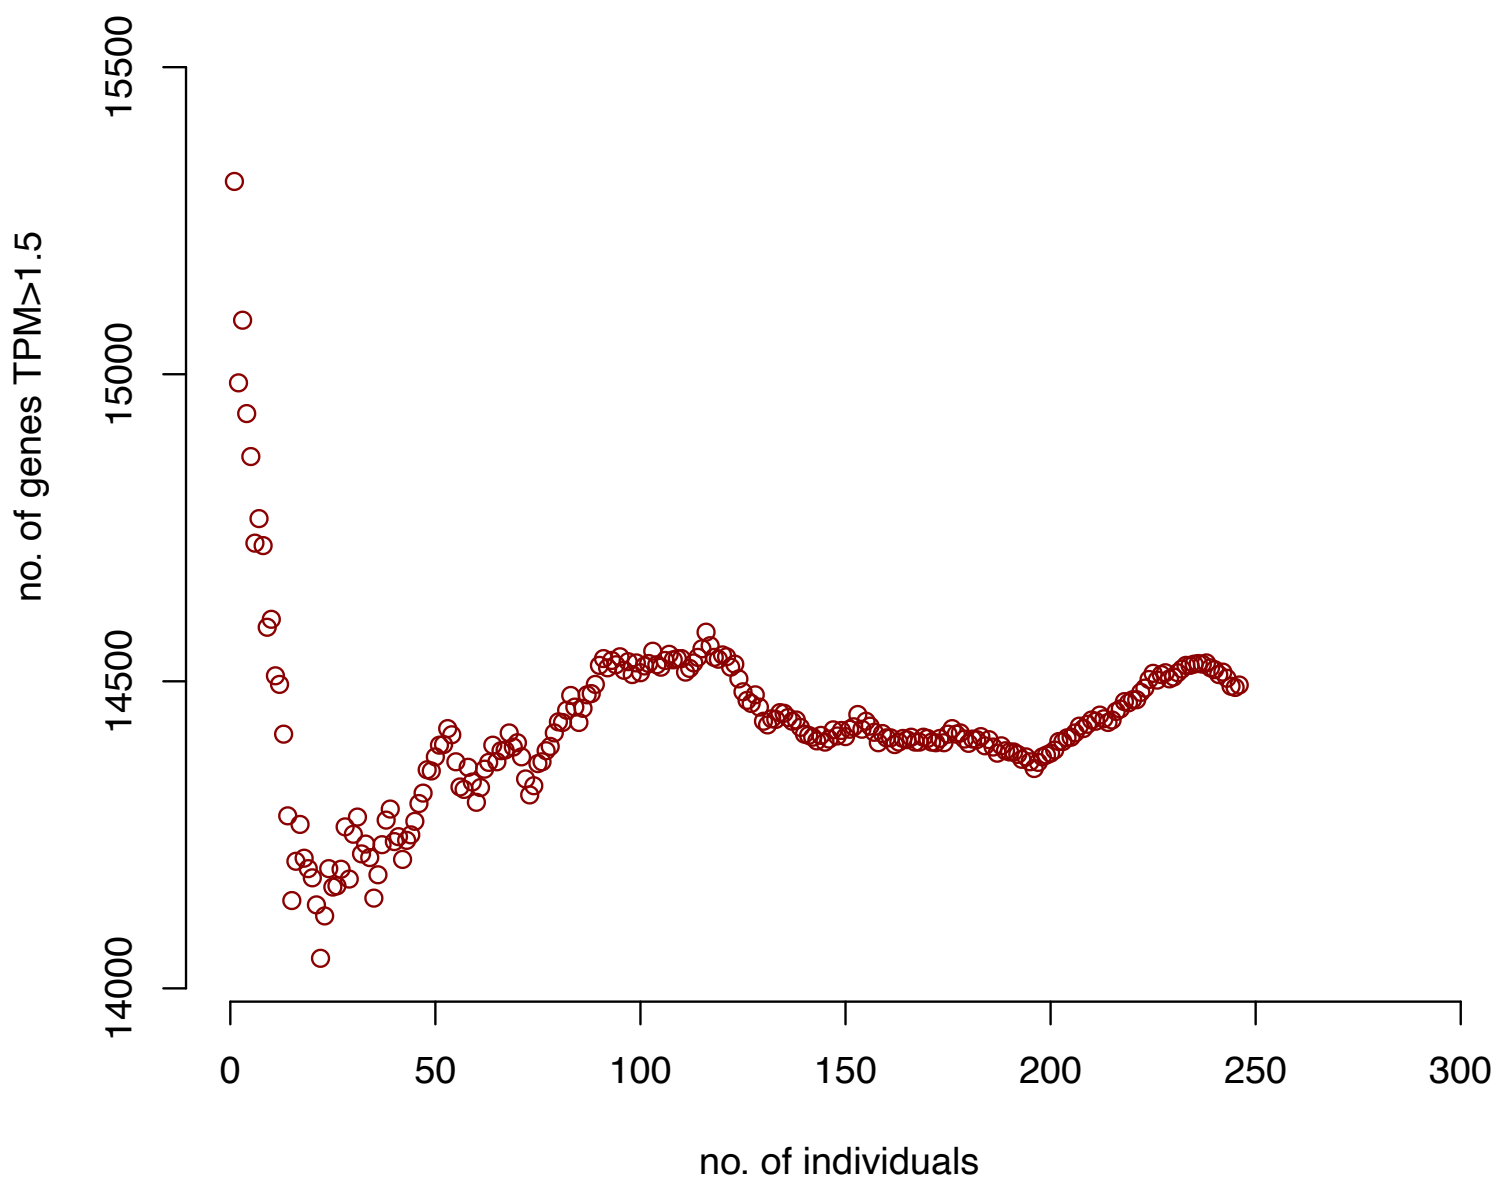

**Gene expression saturation in brain putamen (basal ganglia) tissue  
(total number of samples = 205)**

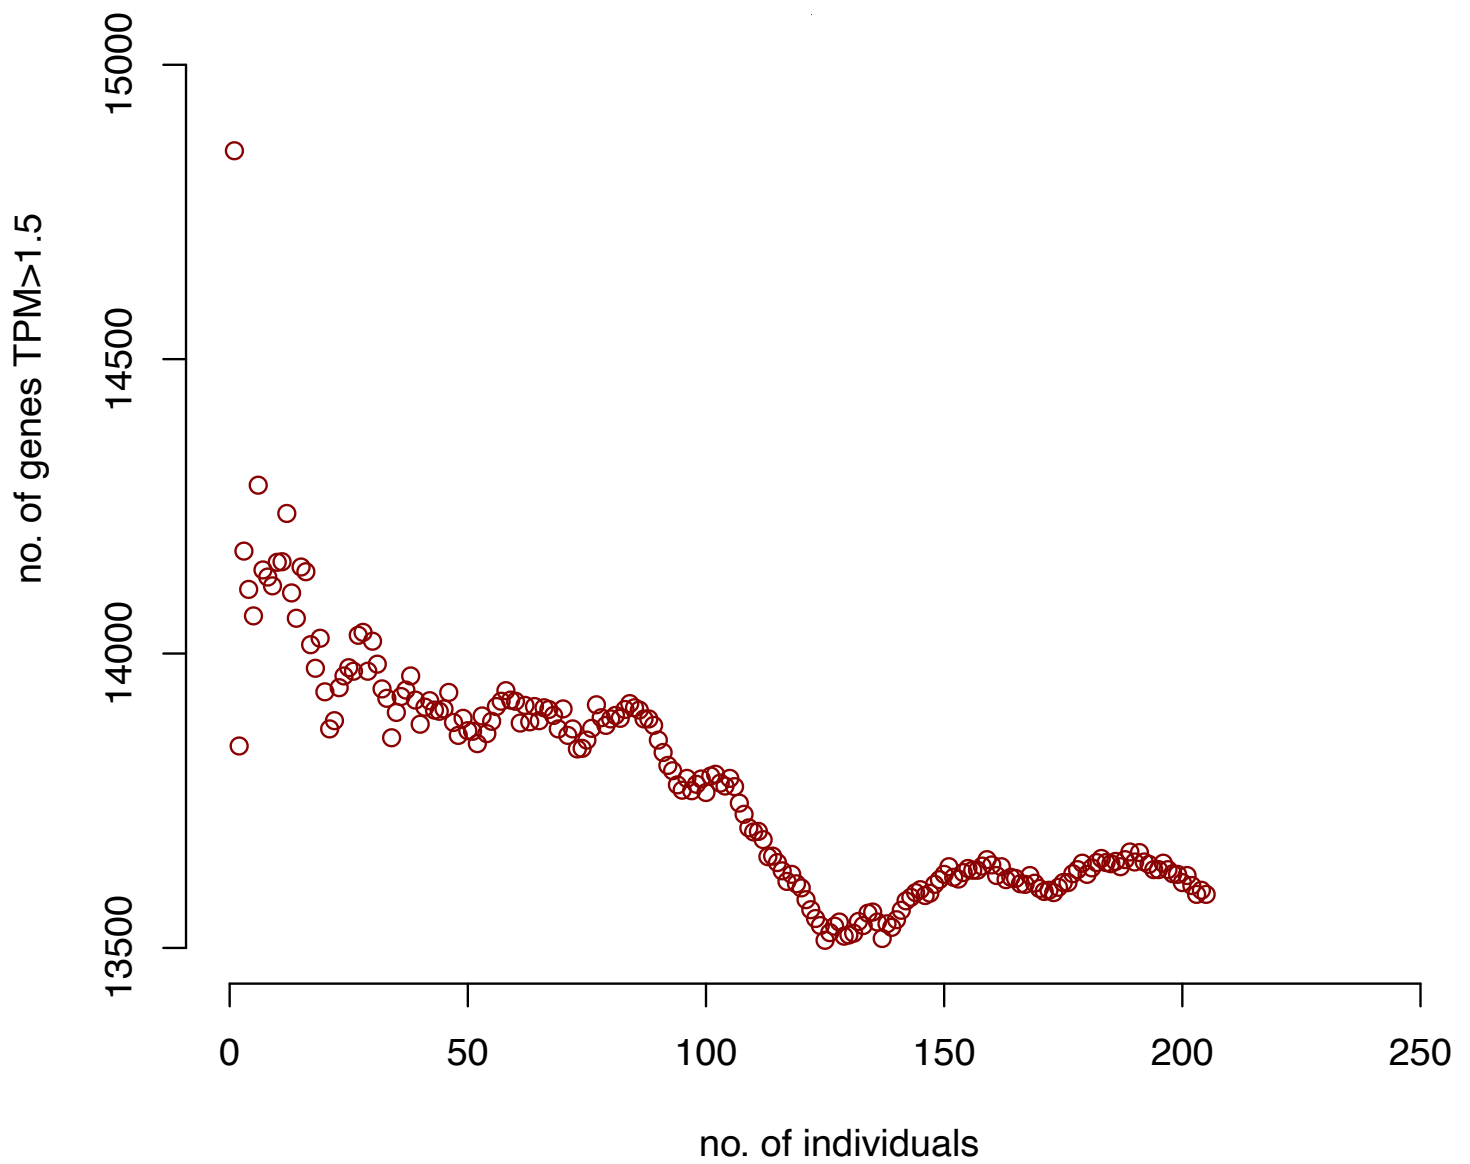

**Gene expression saturation in spinal cord (cervical c-1) tissue  
(total number of samples = 159)**

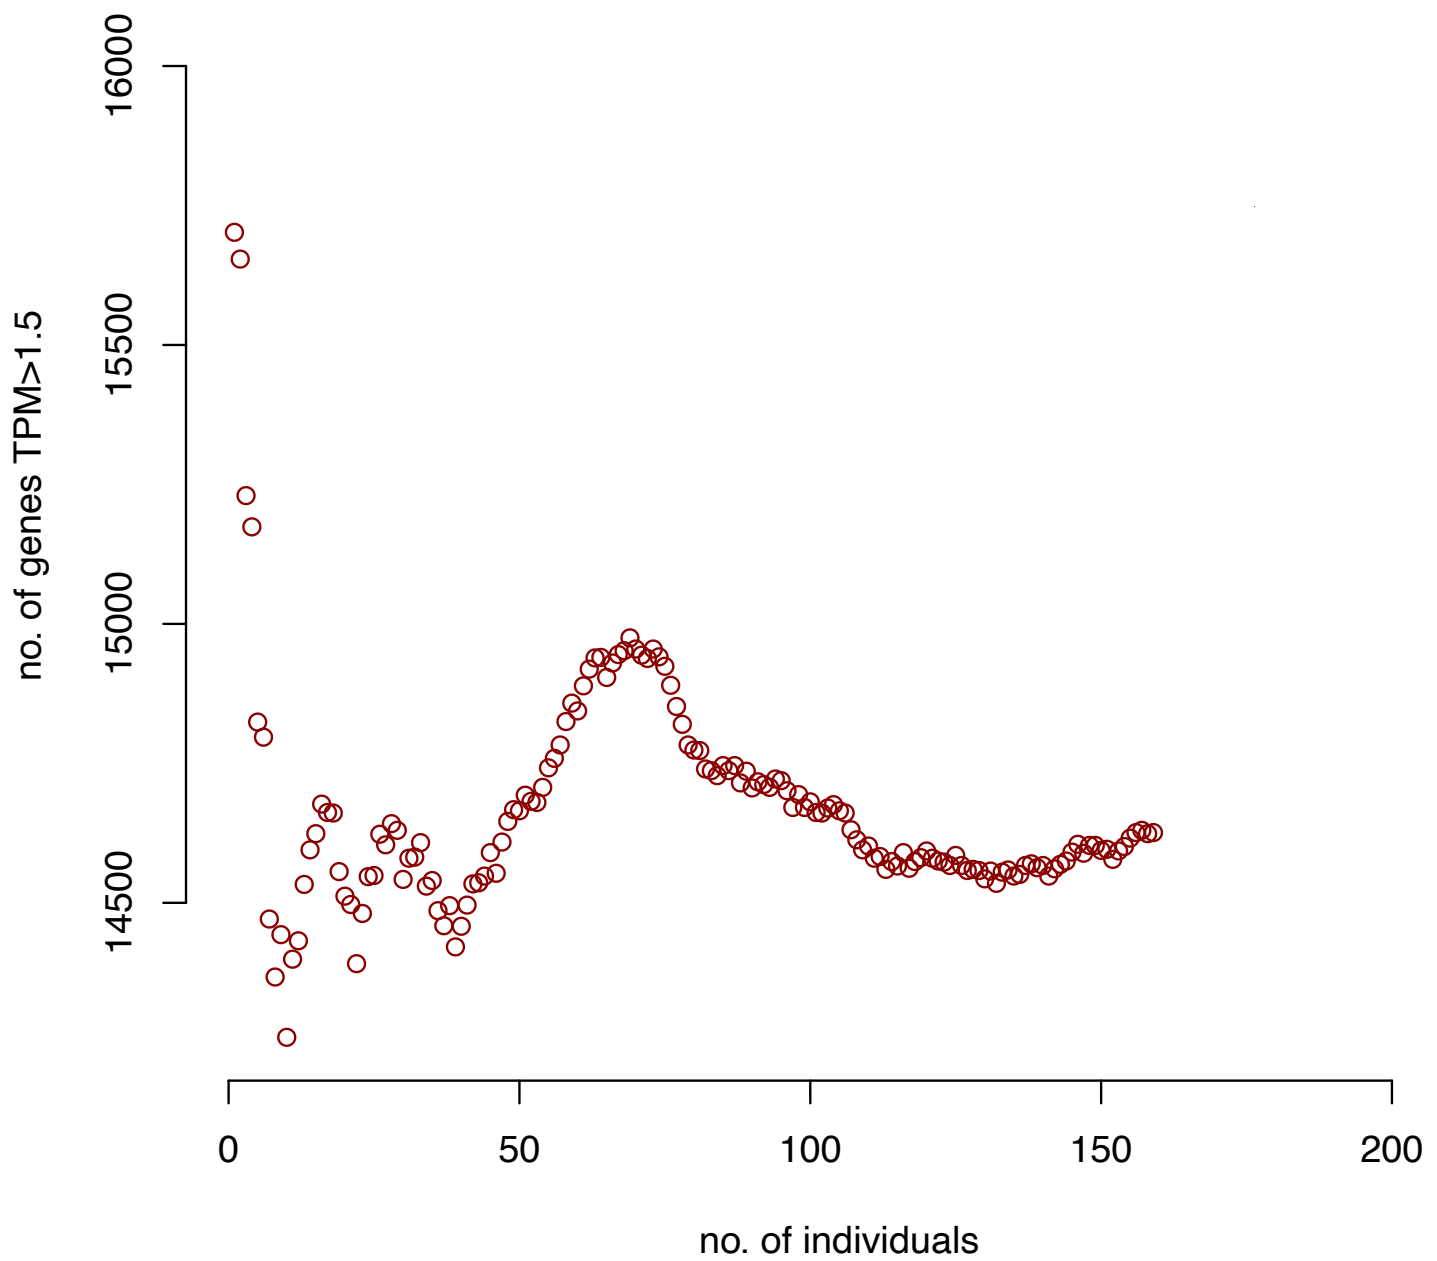

Gene expression saturation in brain substantia nigra tissue  
(total number of samples = 139)

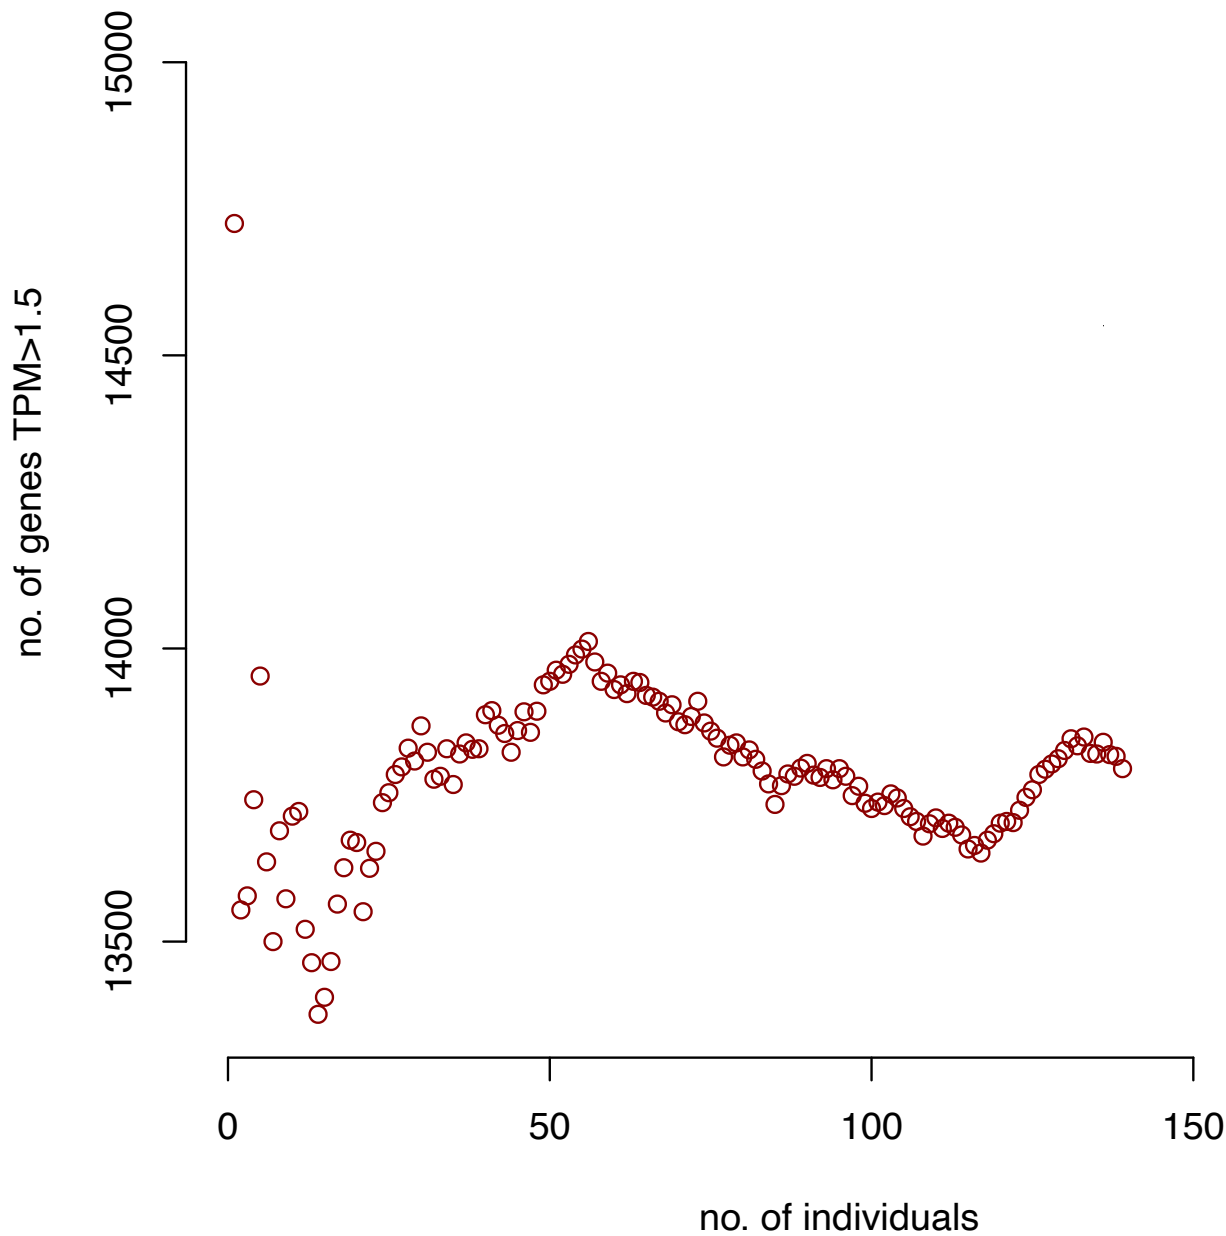

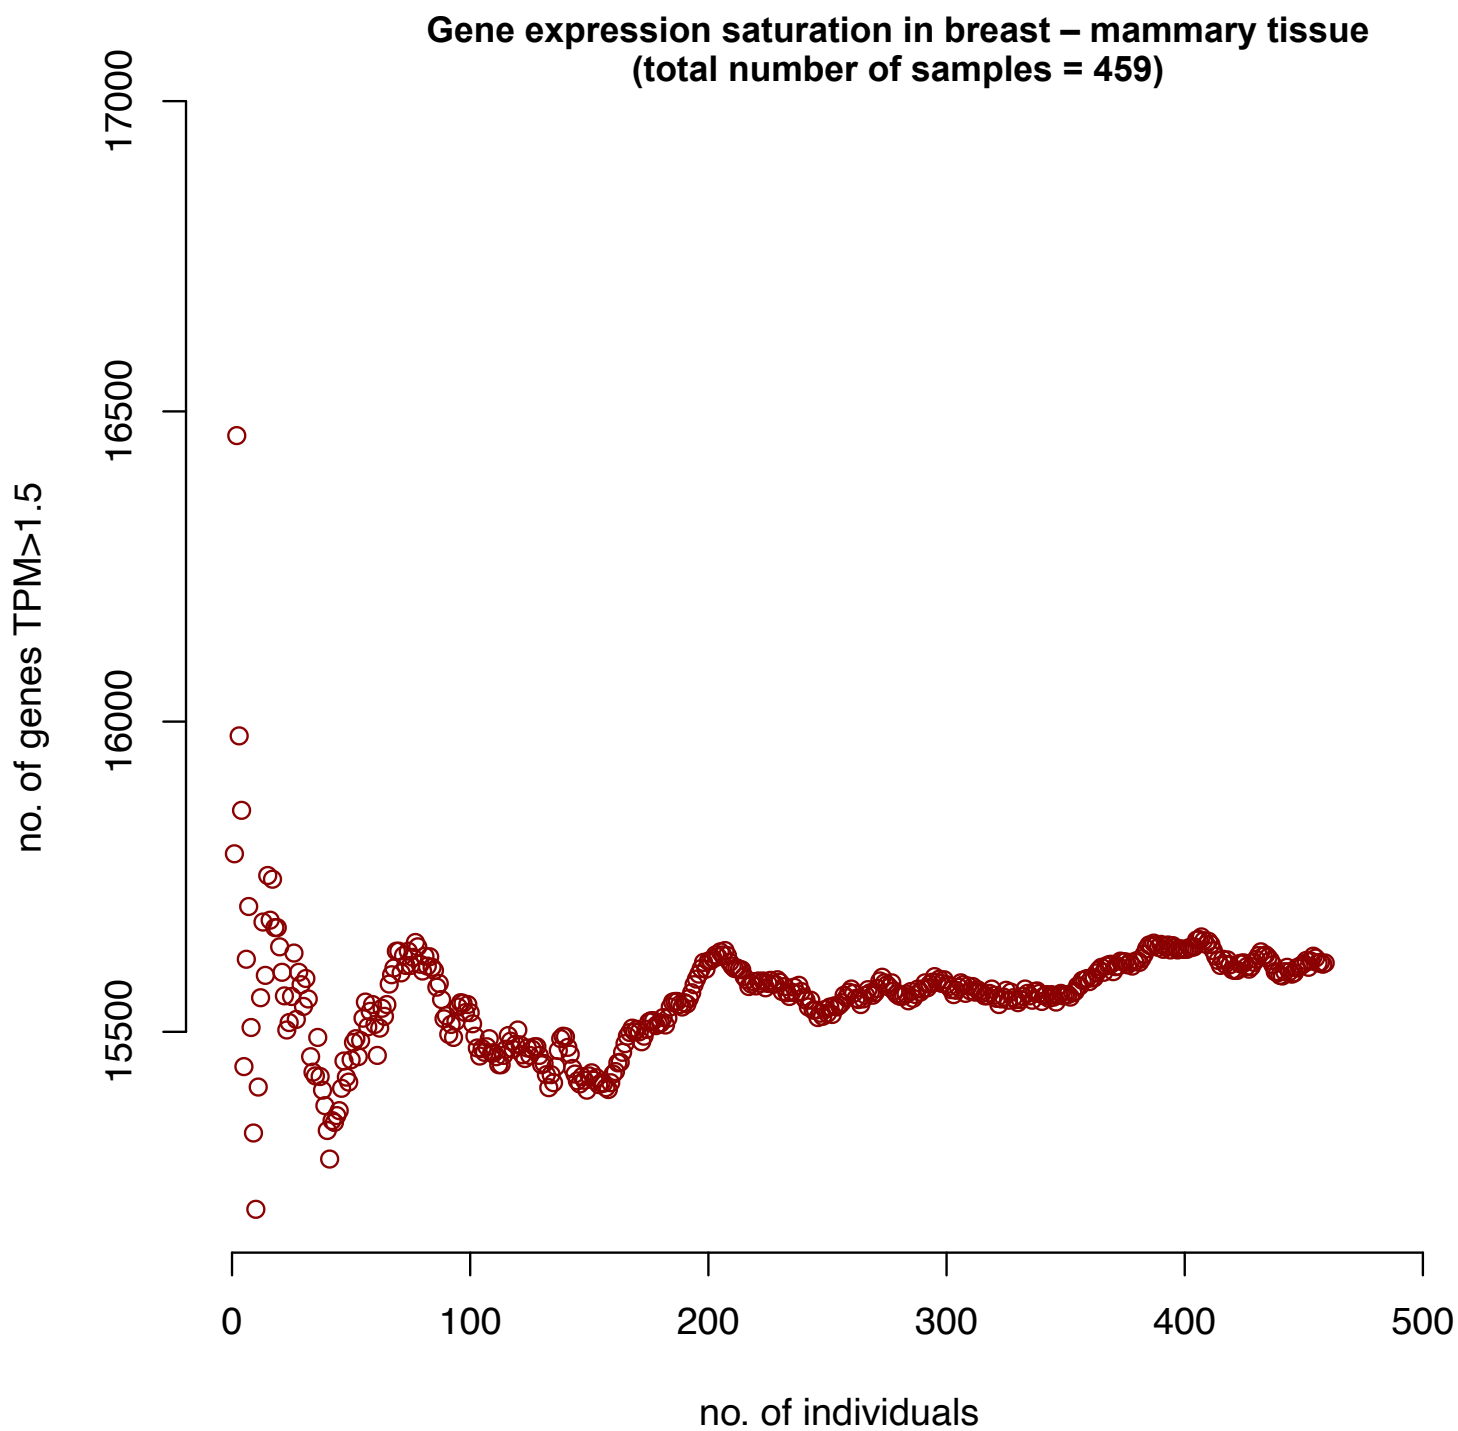

**Gene expression saturation in cultured fibroblasts**  
**(total number of samples = 504)**

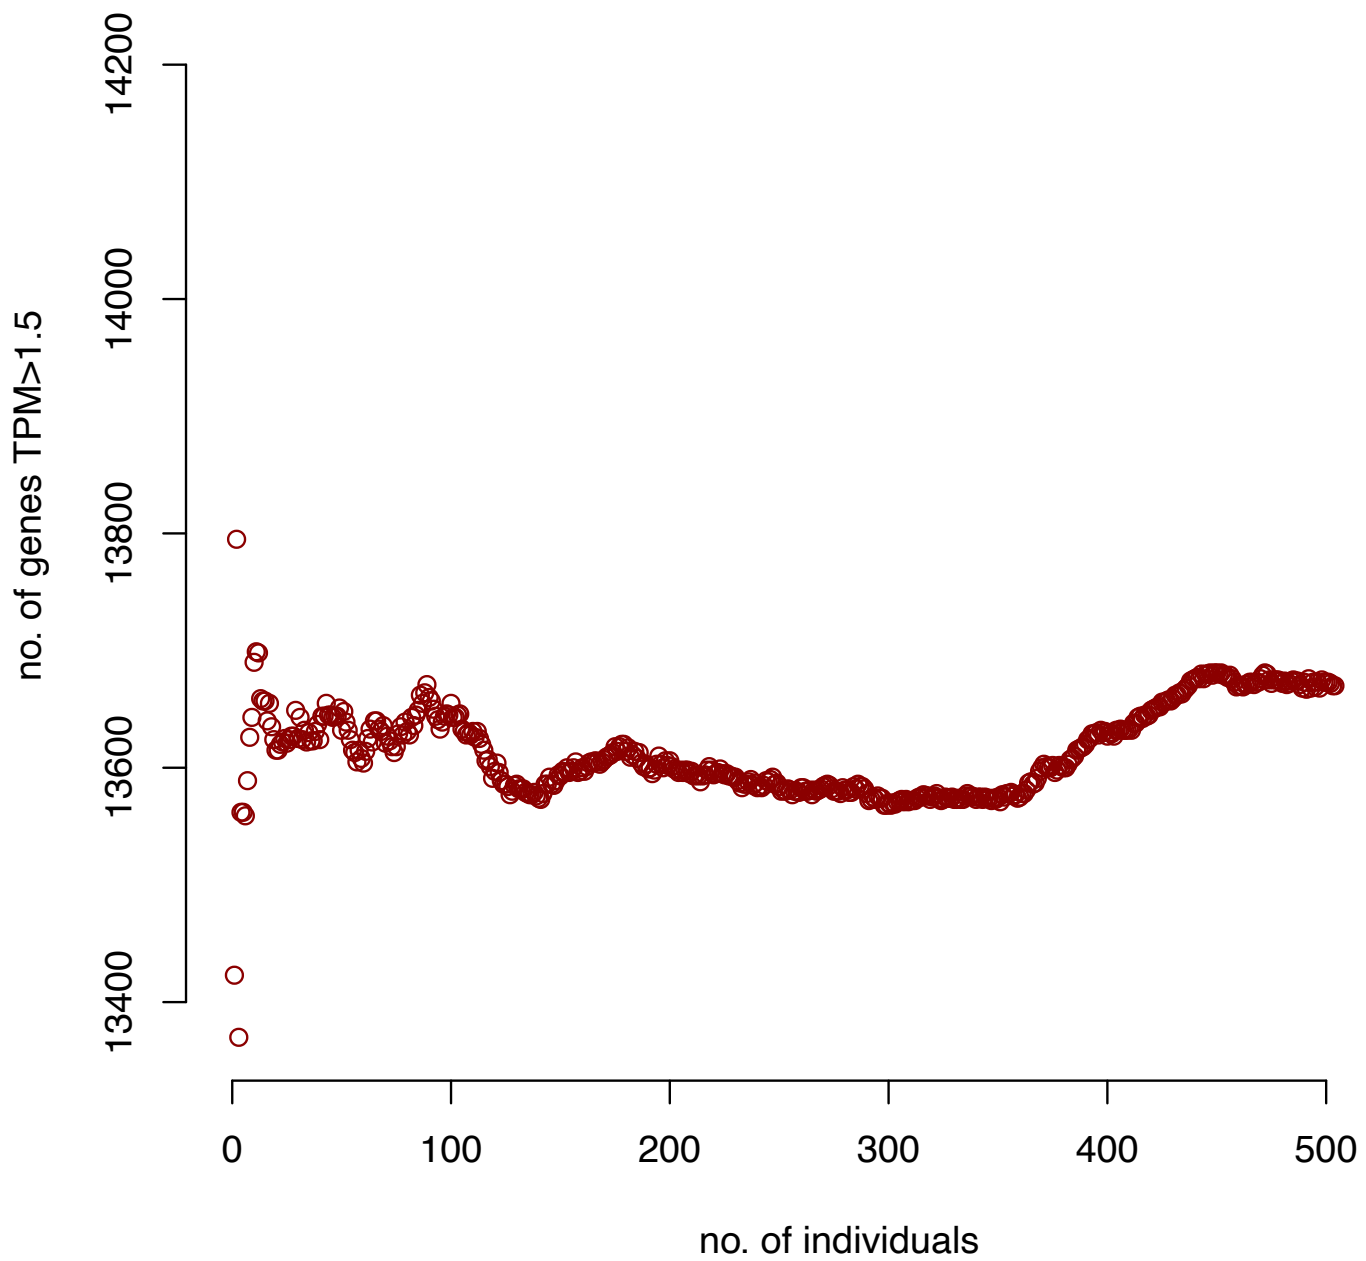

**Gene expression saturation in EBV-transformed lymphocytes  
(total number of samples = 174)**

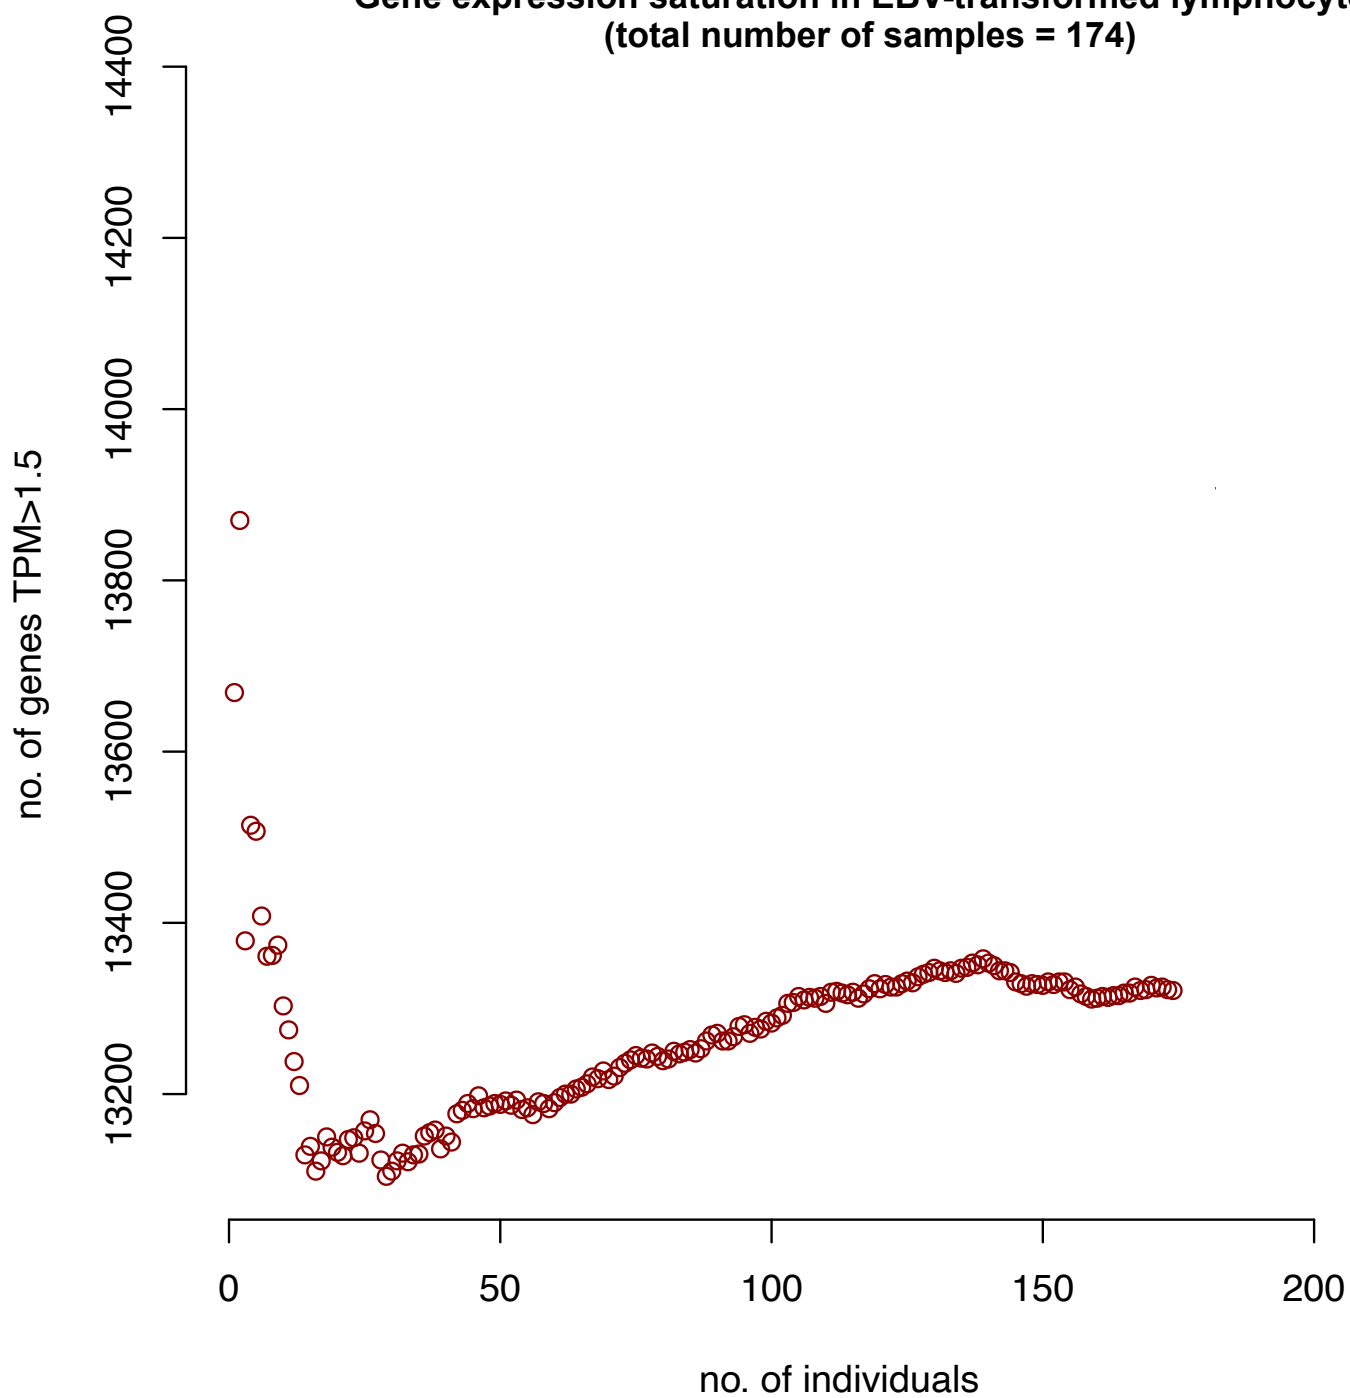

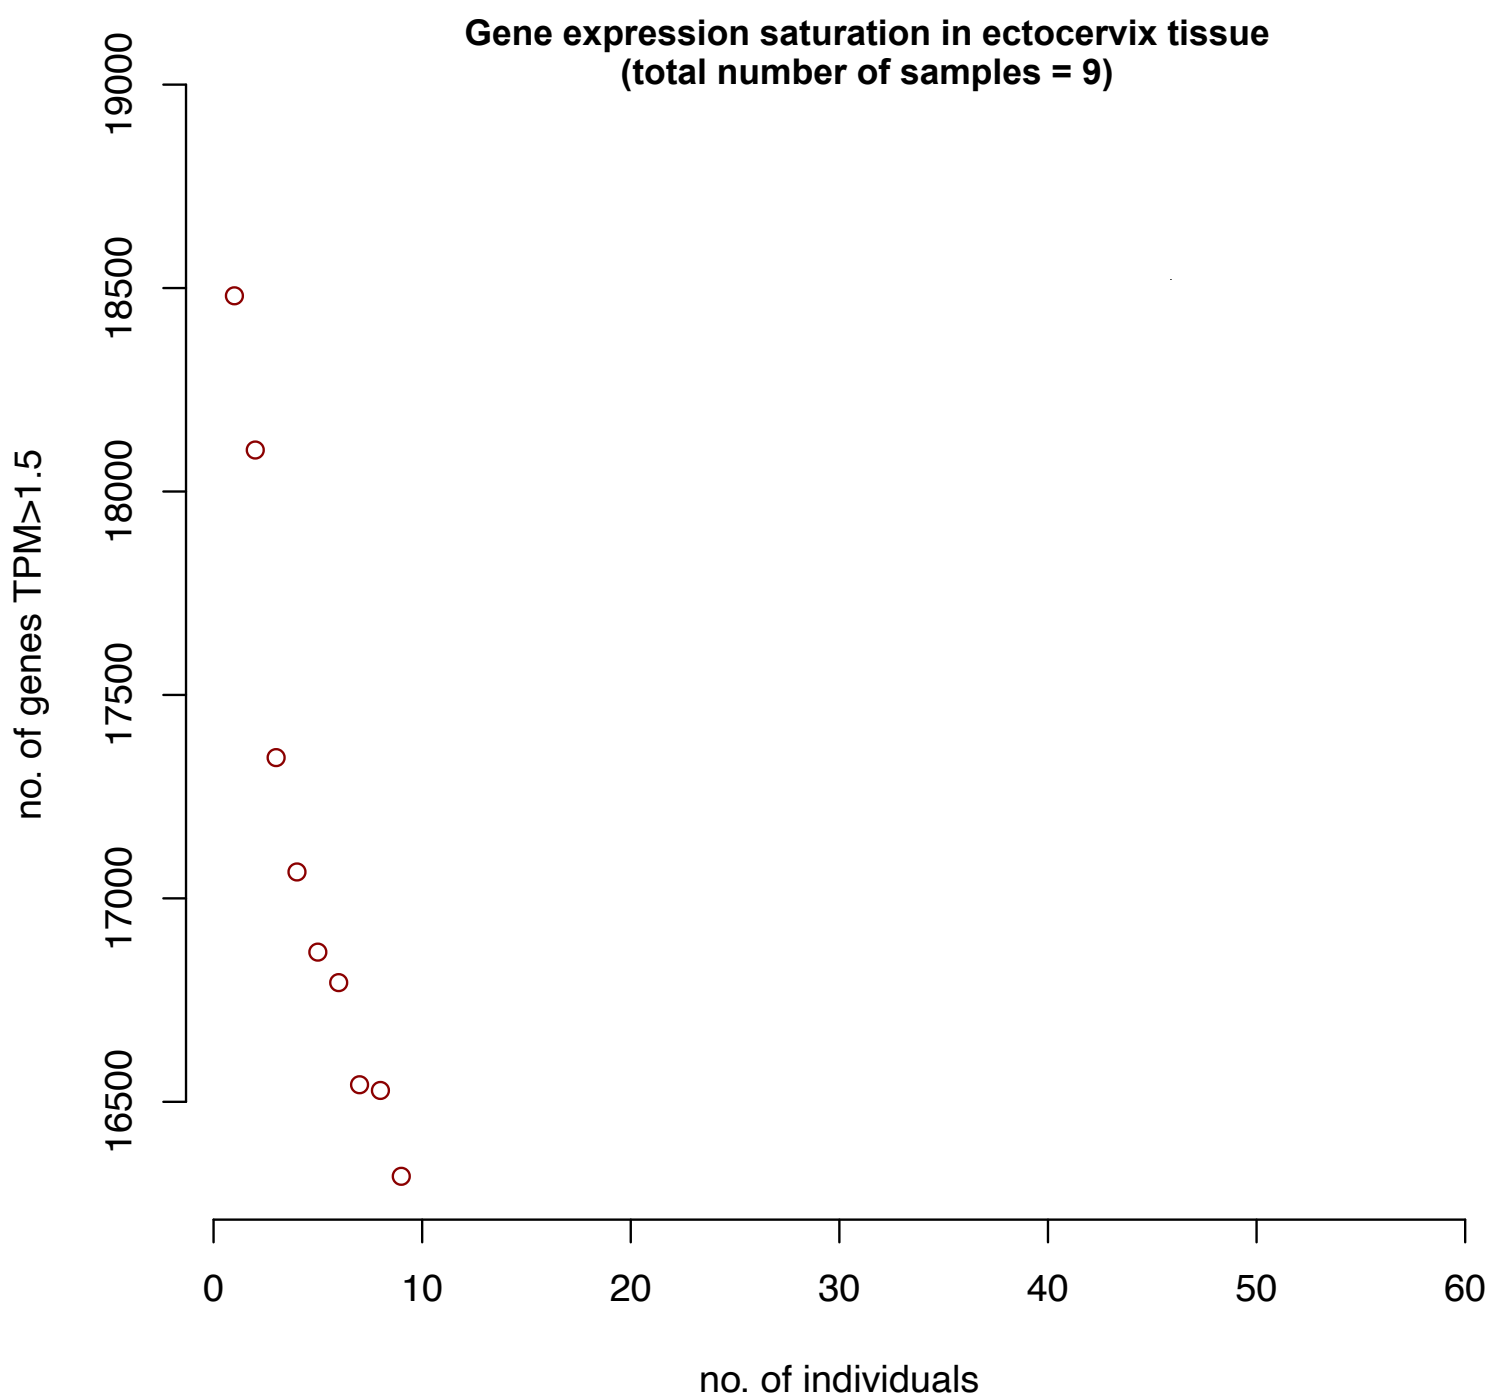

**Gene expression saturation in endocervix tissue  
(total number of samples = 10)**

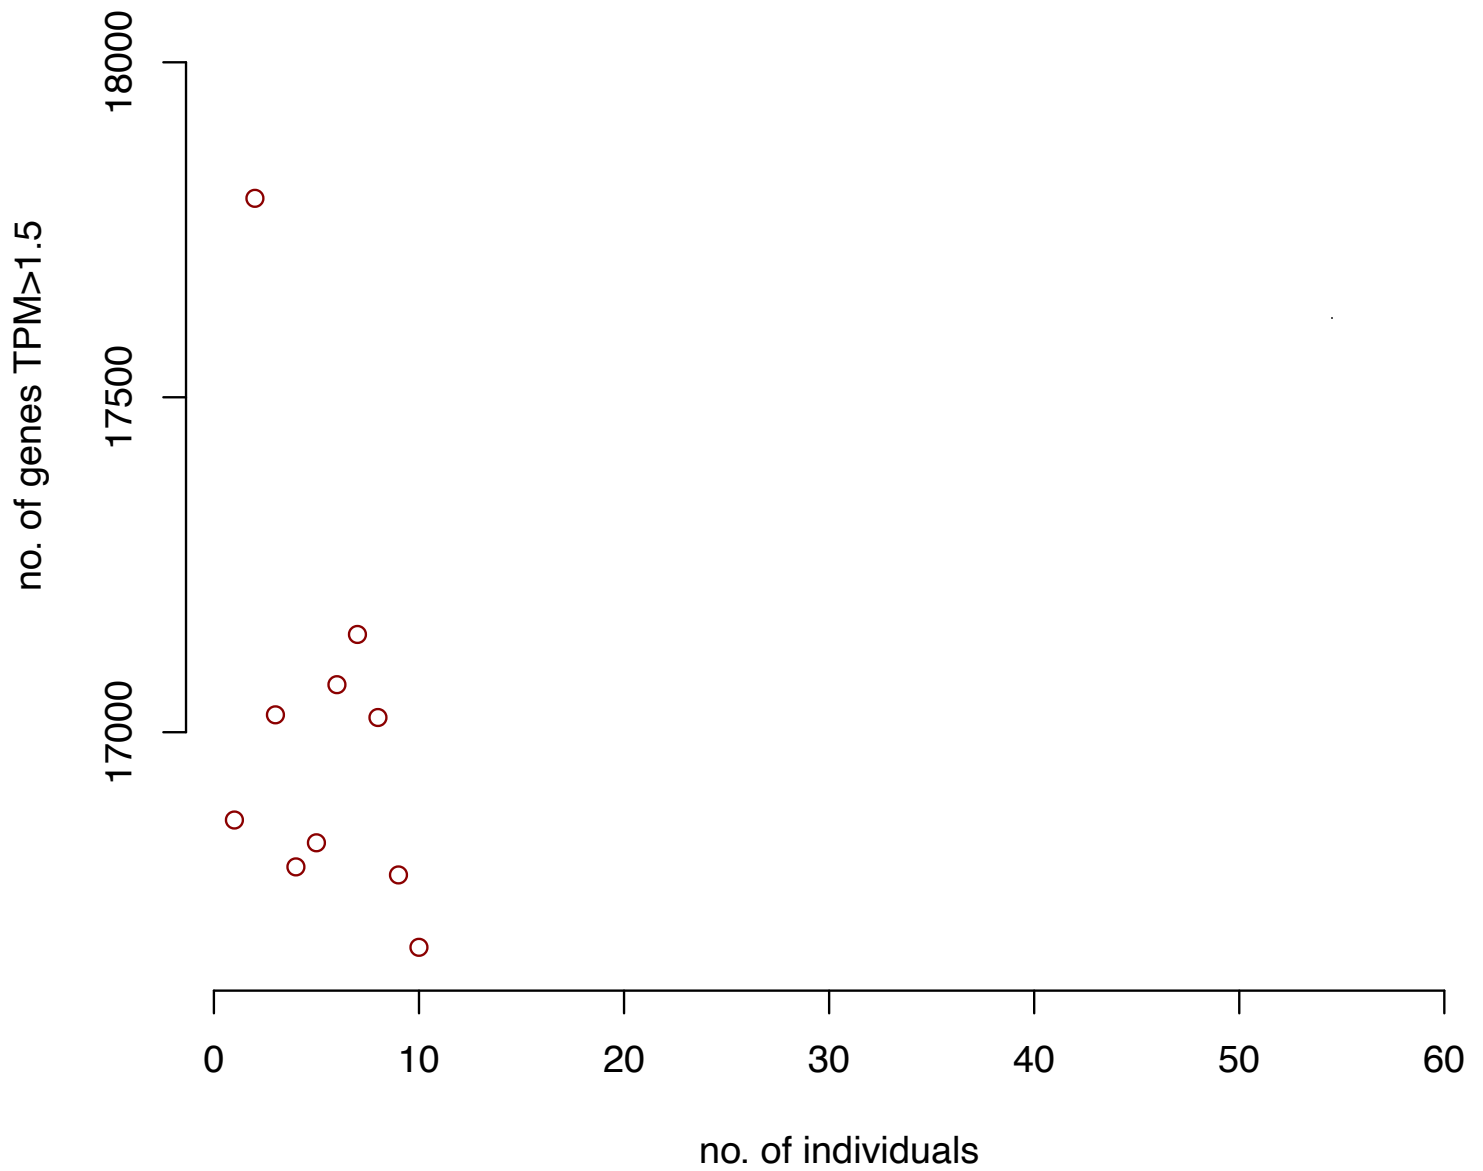

**Gene expression saturation in sigmoid colon tissue  
(total number of samples = 373)**

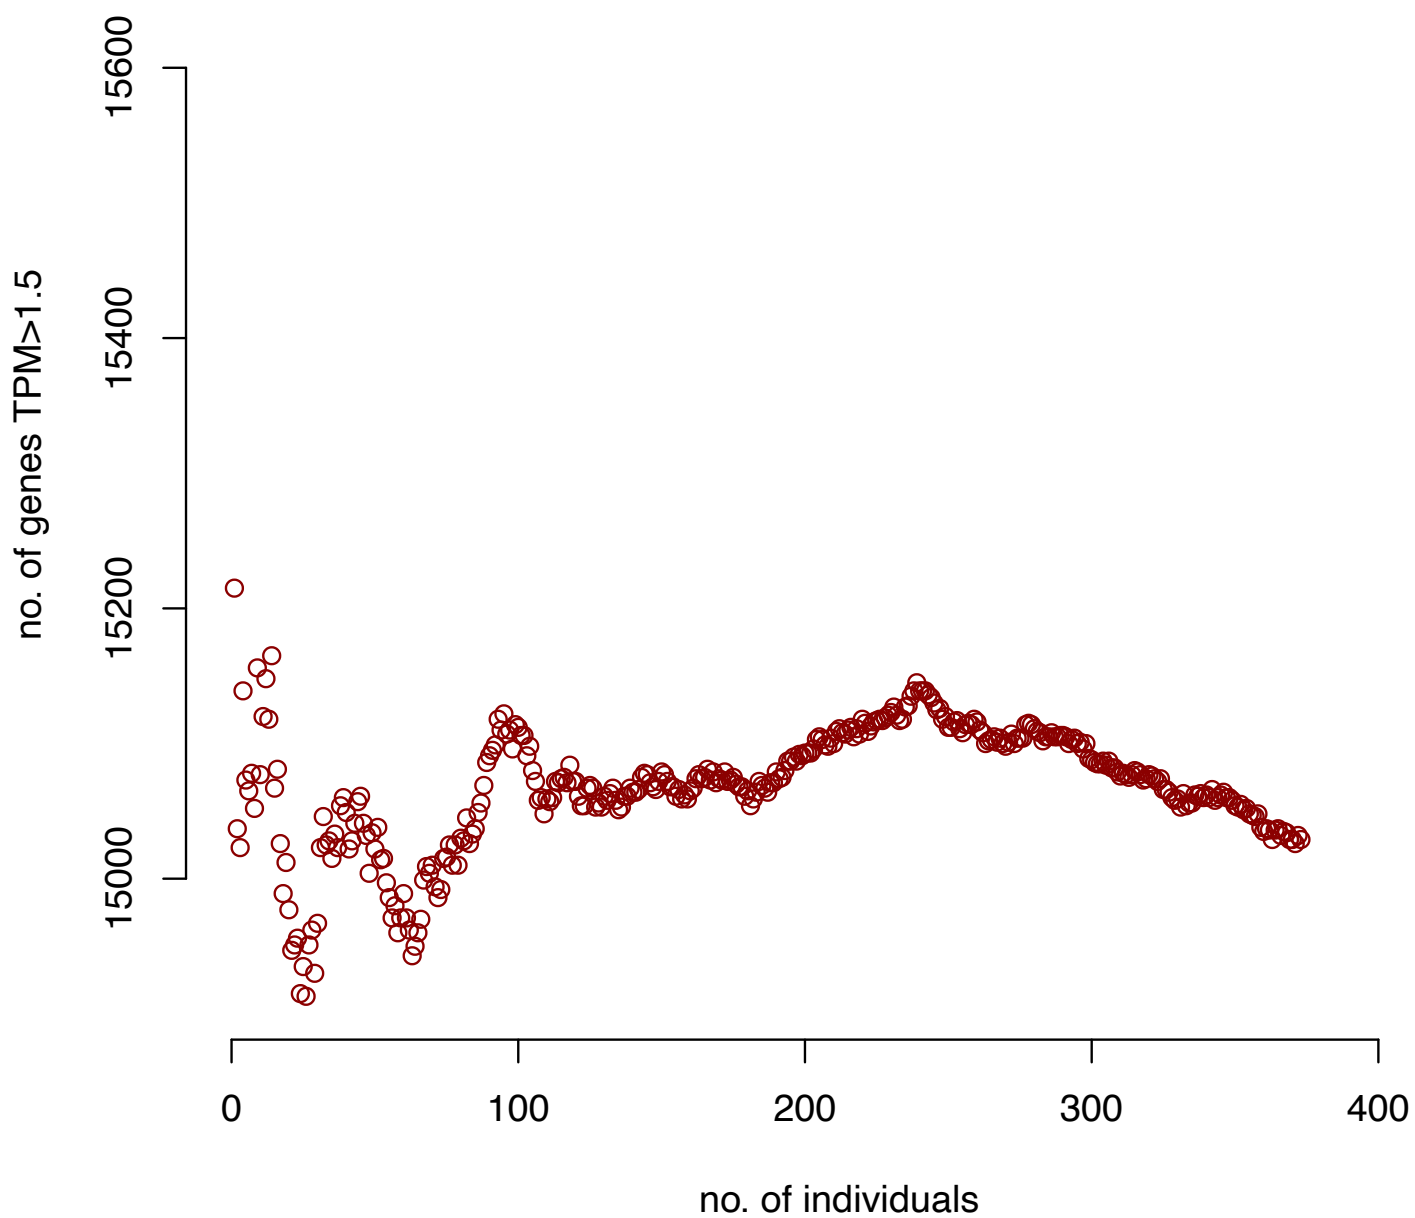

**Gene expression saturation in transverse colon tissue  
(total number of samples = 406)**

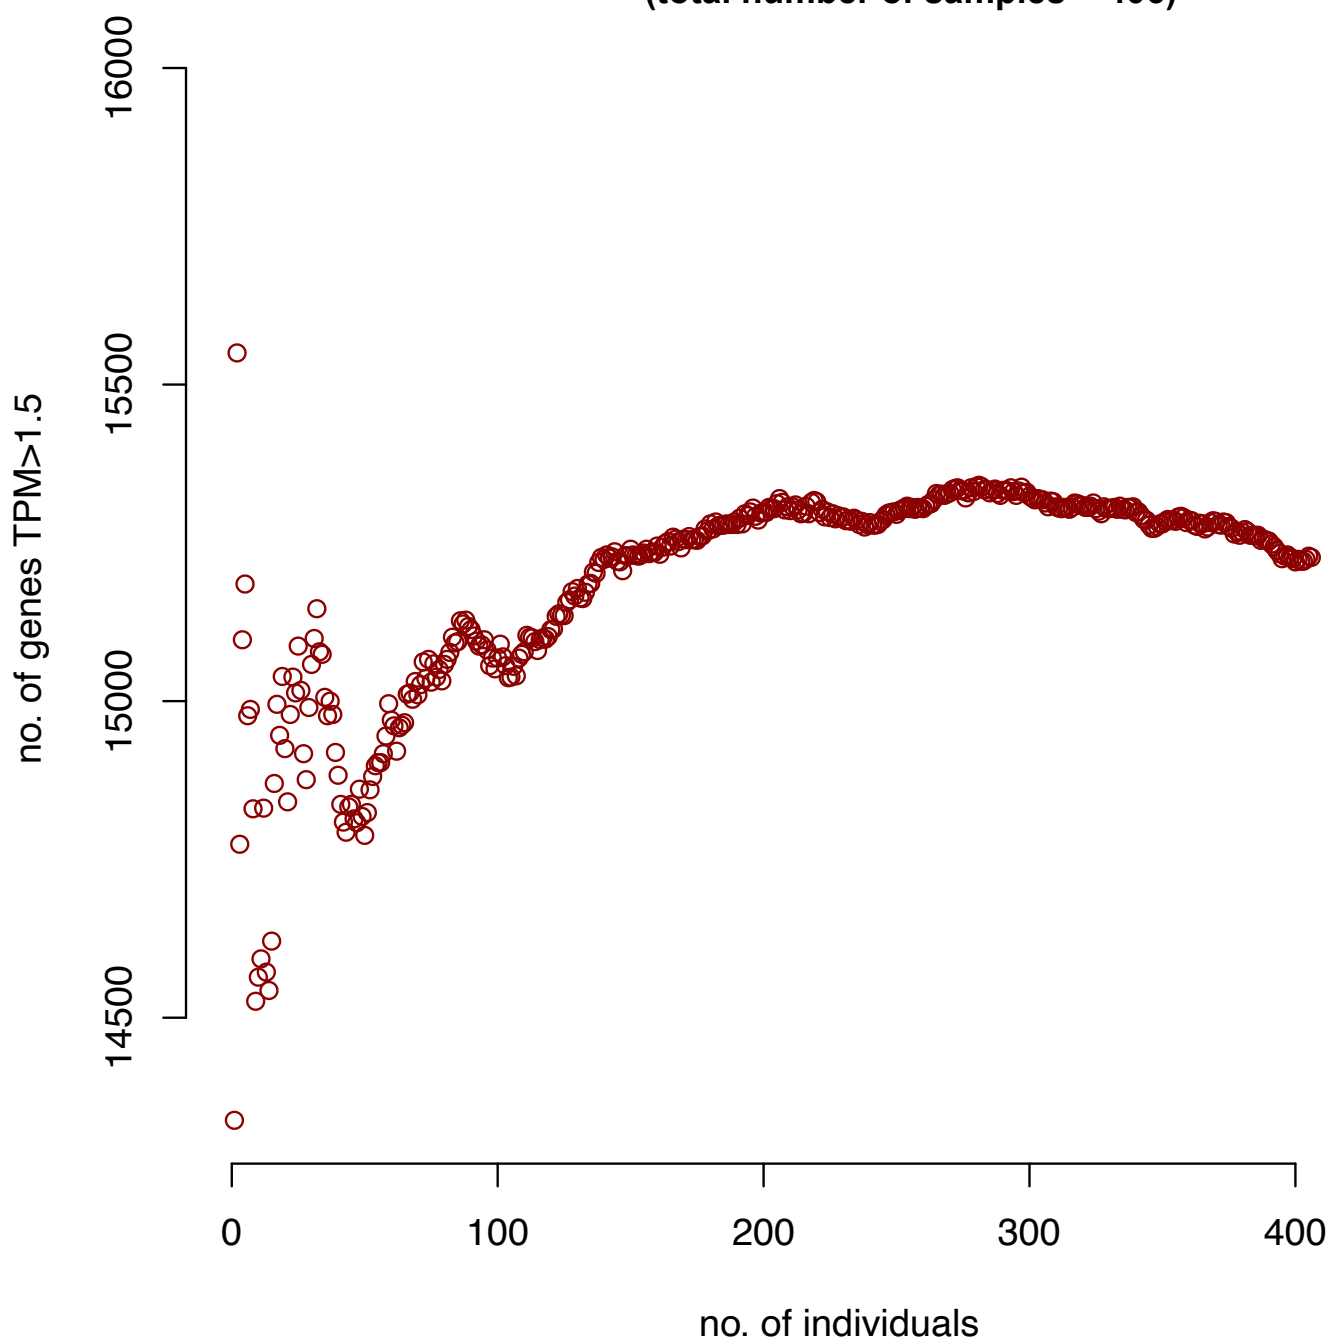

**Gene expression saturation in esophagus – gastroesophageal junction tissue  
(total number of samples = 375)**

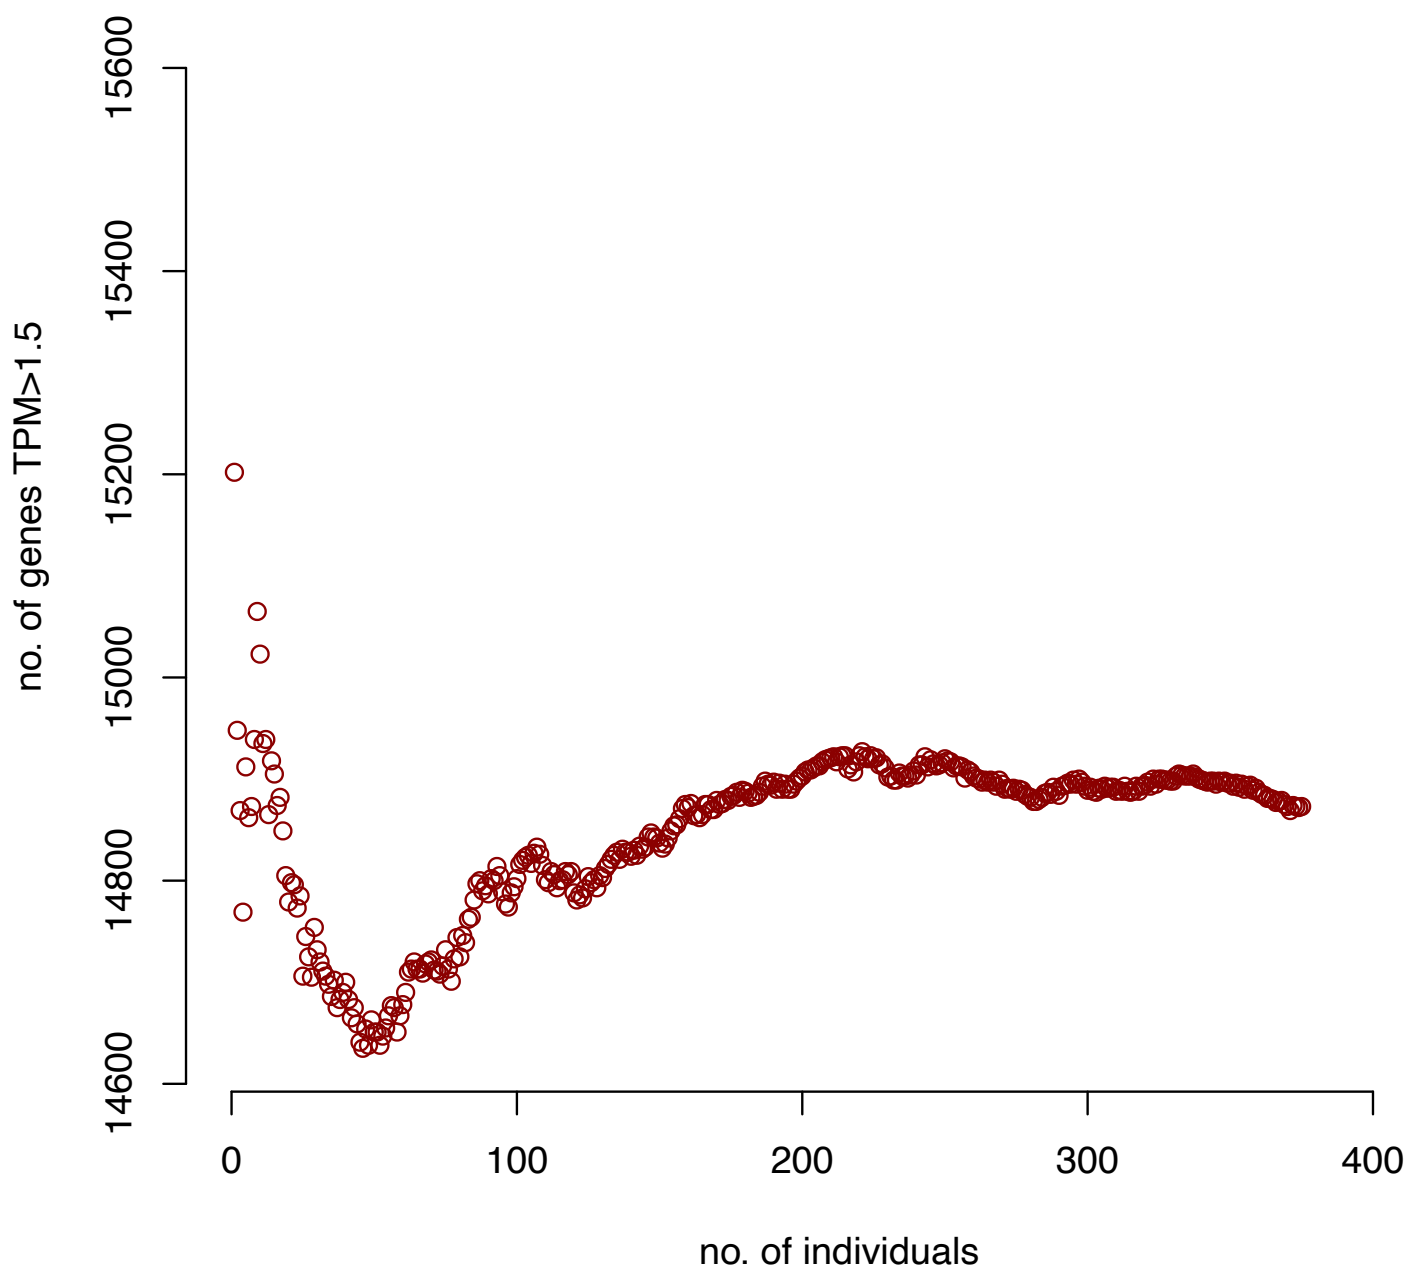

**Gene expression saturation in esophagus – mucosa tissue  
(total number of samples = 555)**

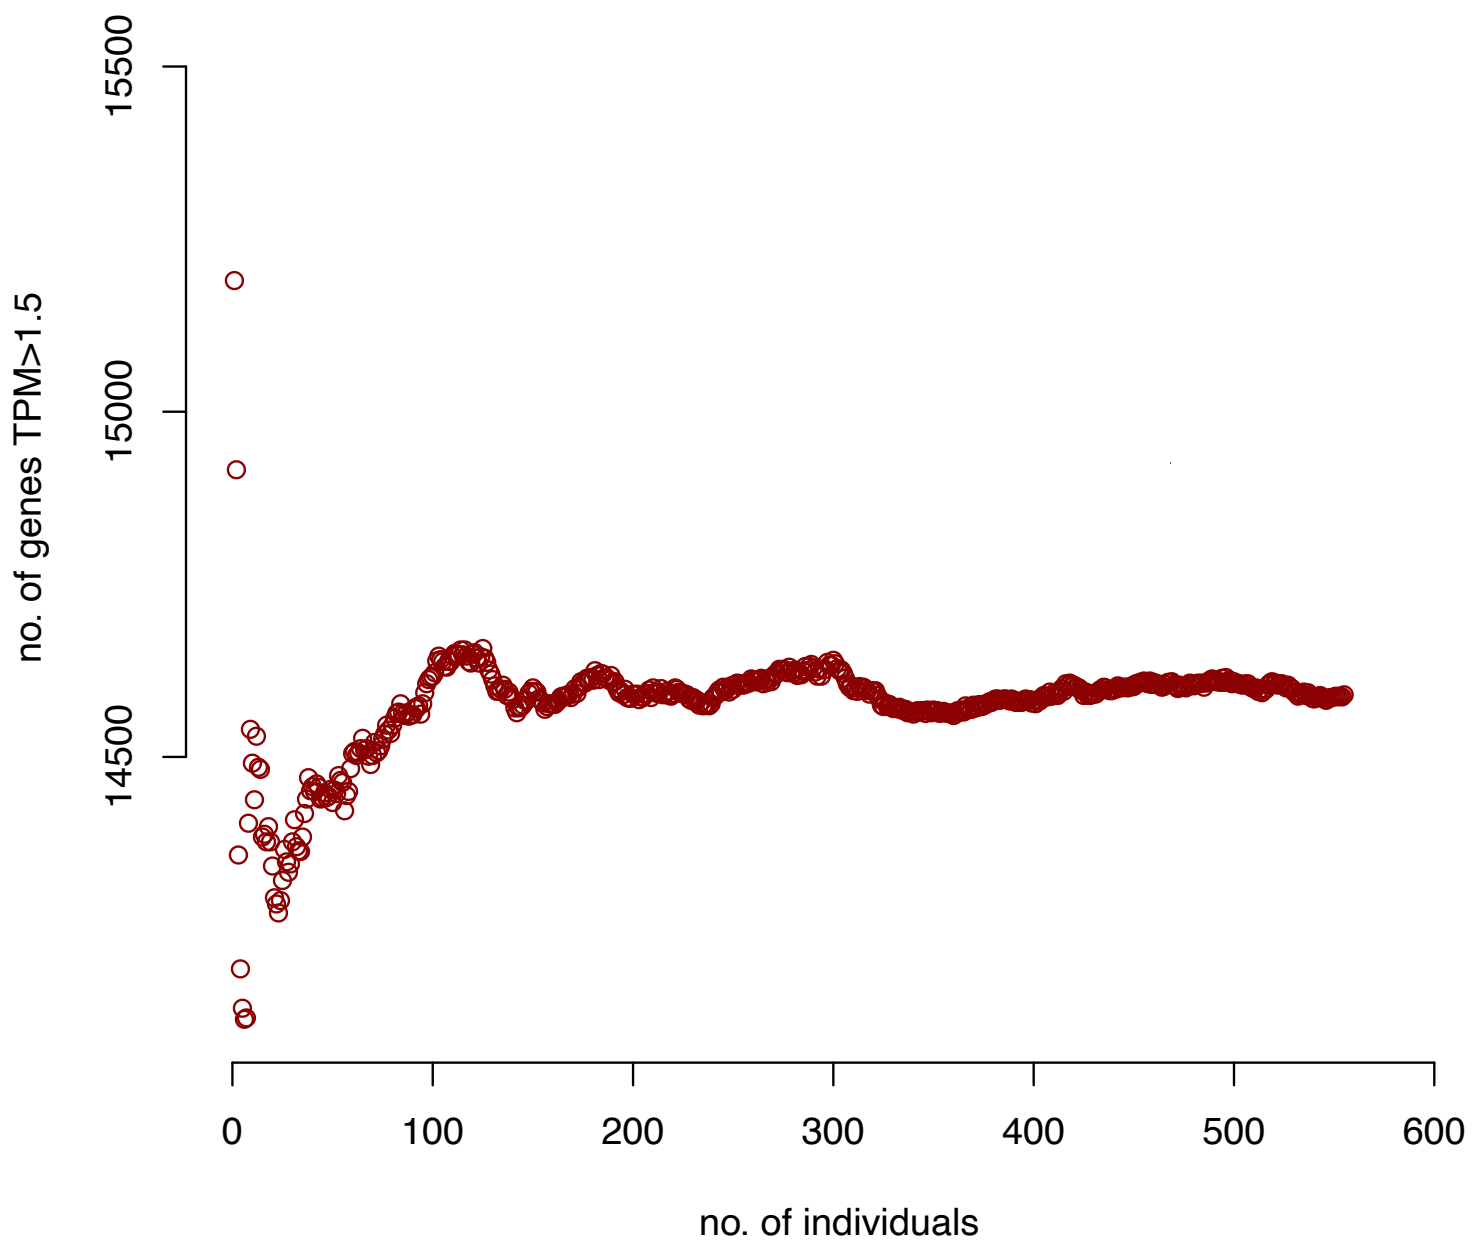

**Gene expression saturation in esophagus – muscularis tissue  
(total number of samples = 515)**

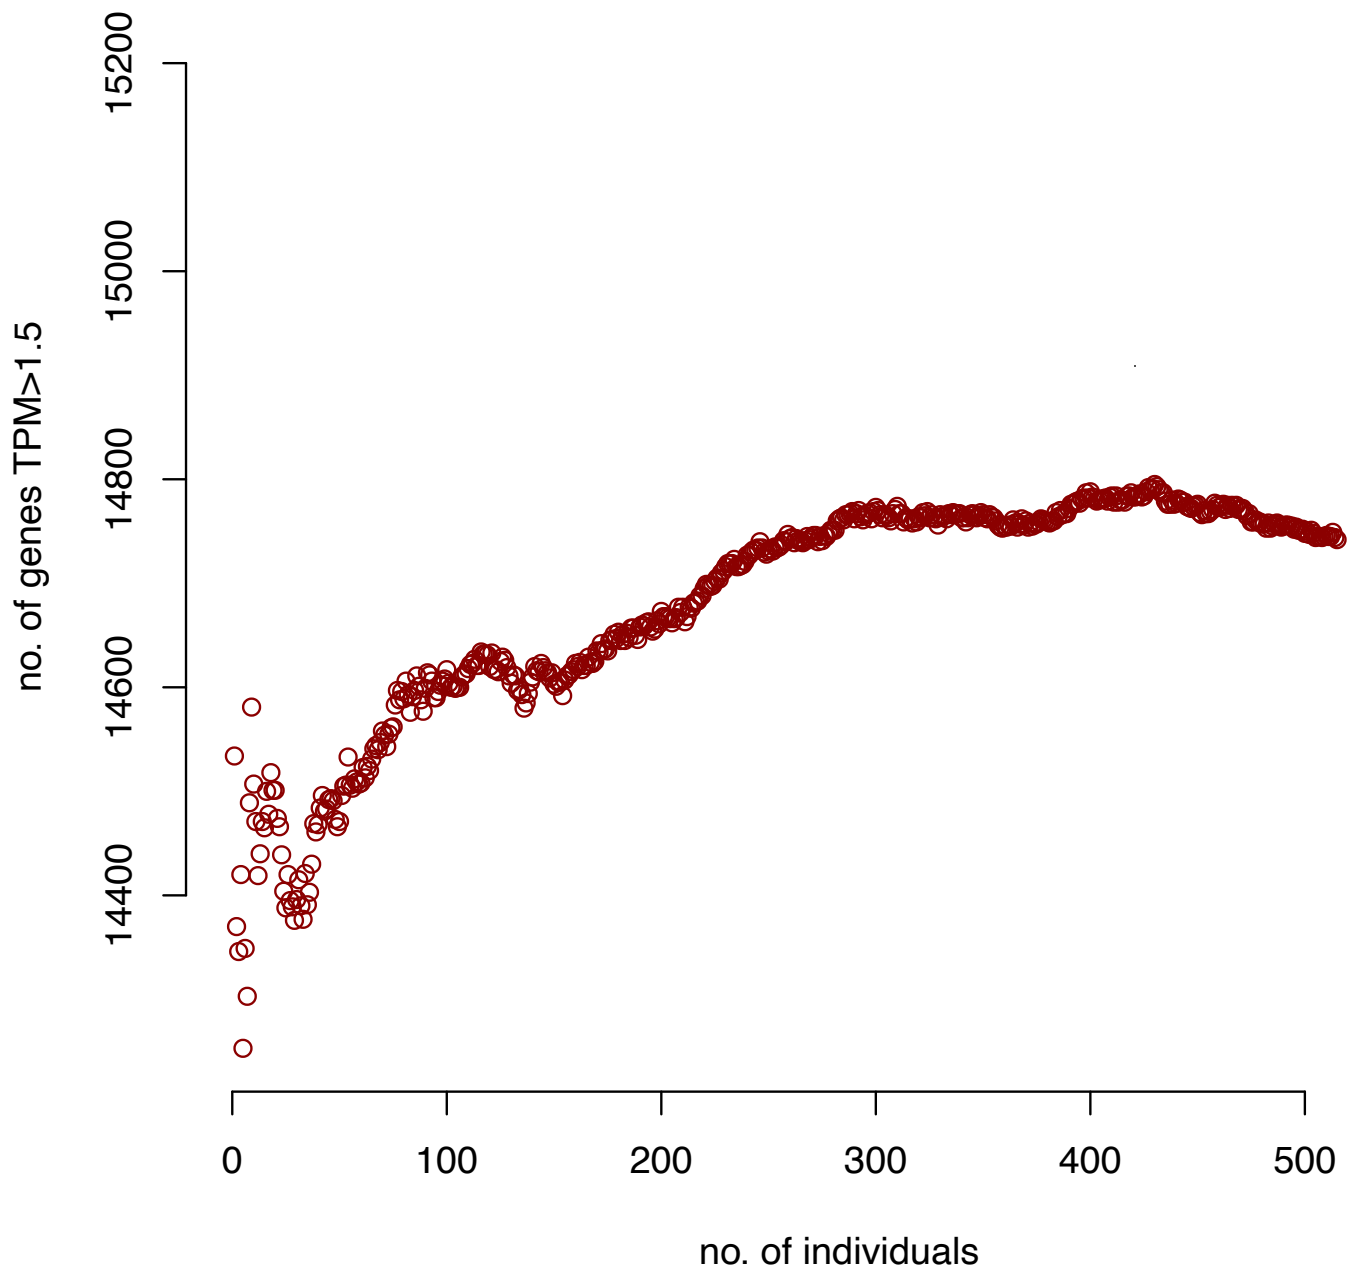

**Gene expression saturation in fallopian tube tissue  
(total number of samples = 9)**

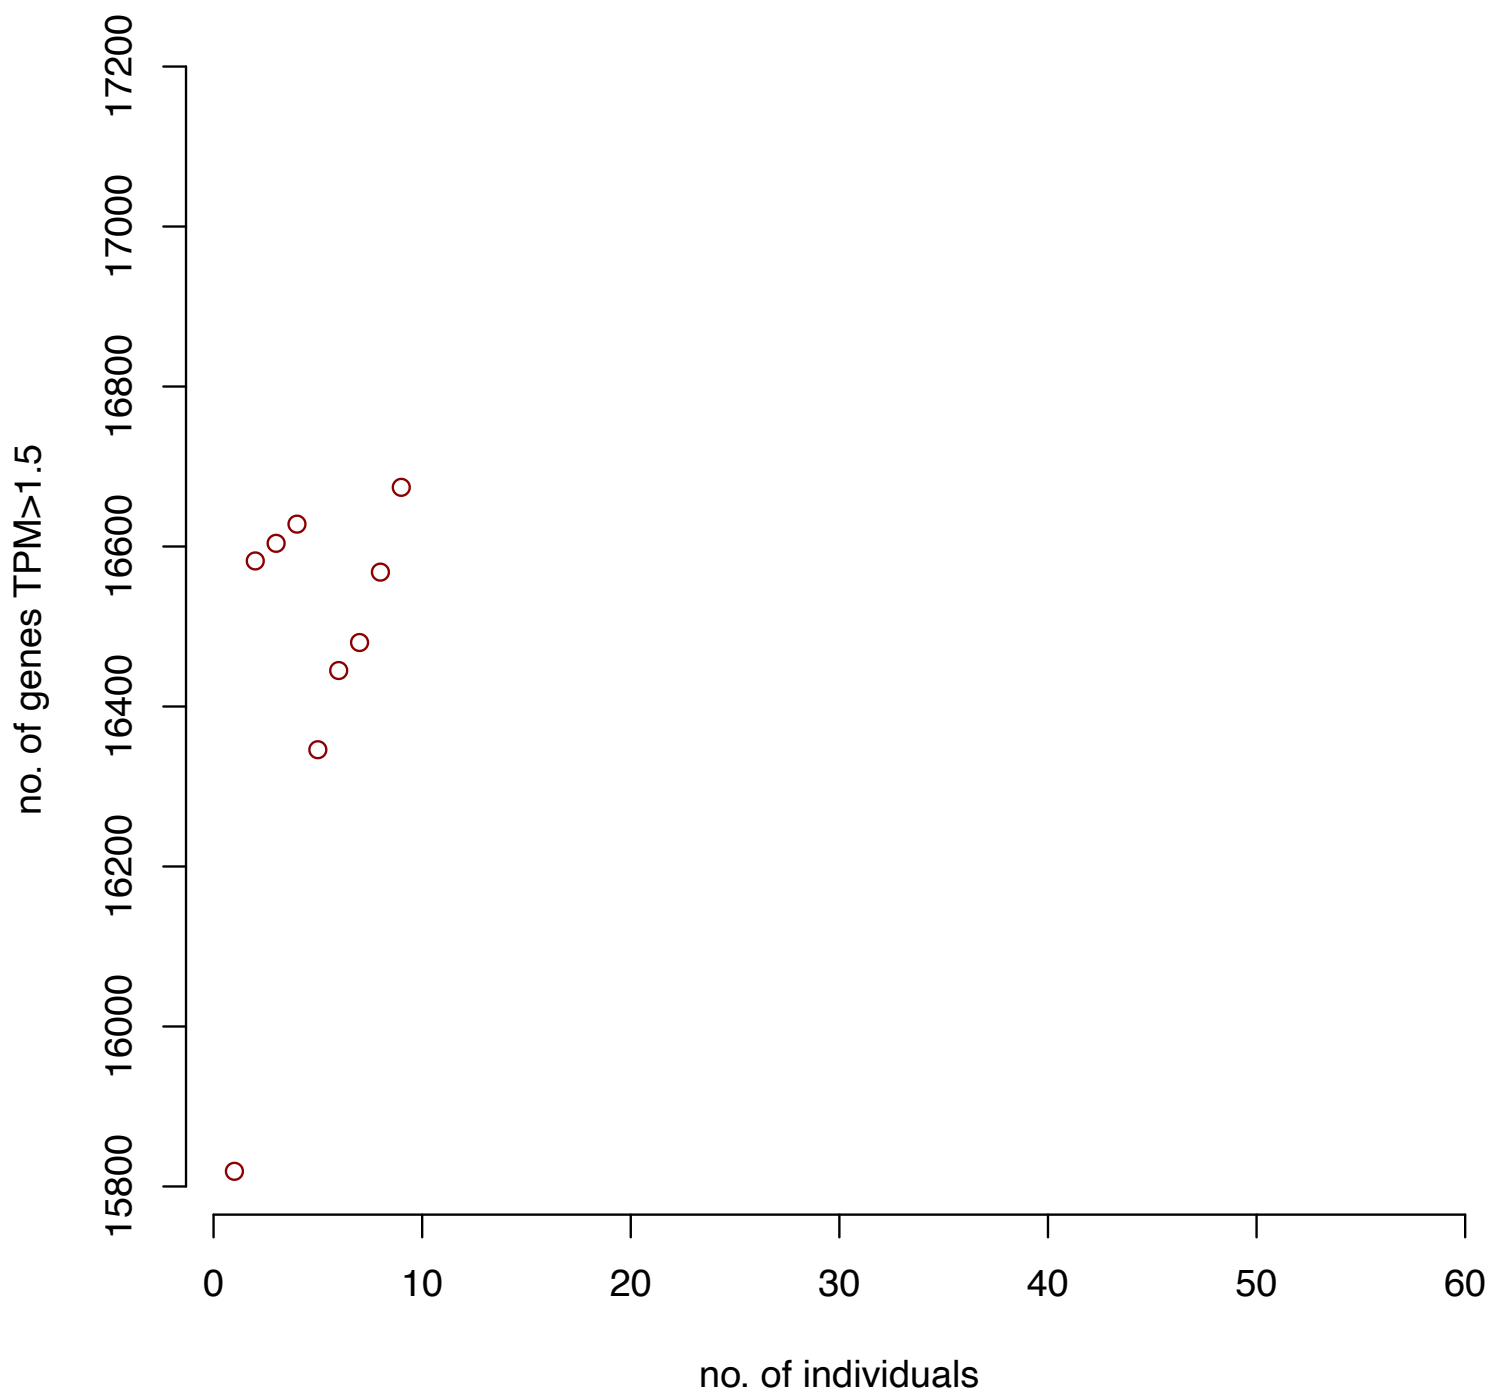

Gene expression saturation in heart – atrial appendage tissue  
(total number of samples = 429)

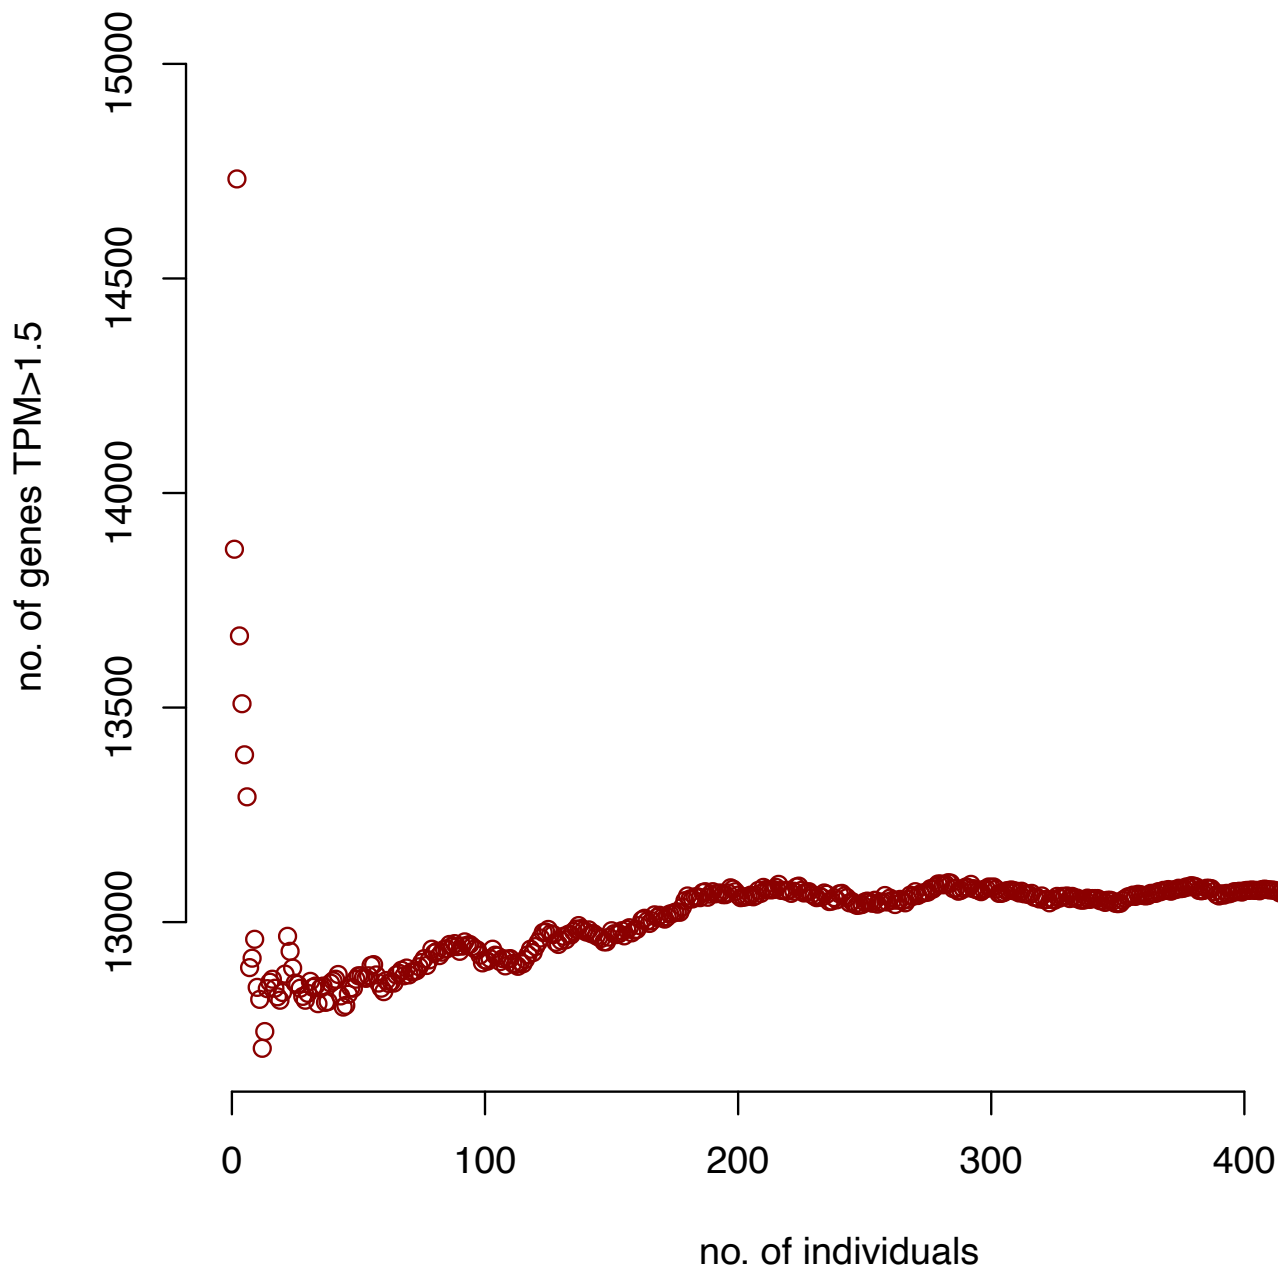

**Gene expression saturation in heart – left ventricle tissue  
(total number of samples = 432)**

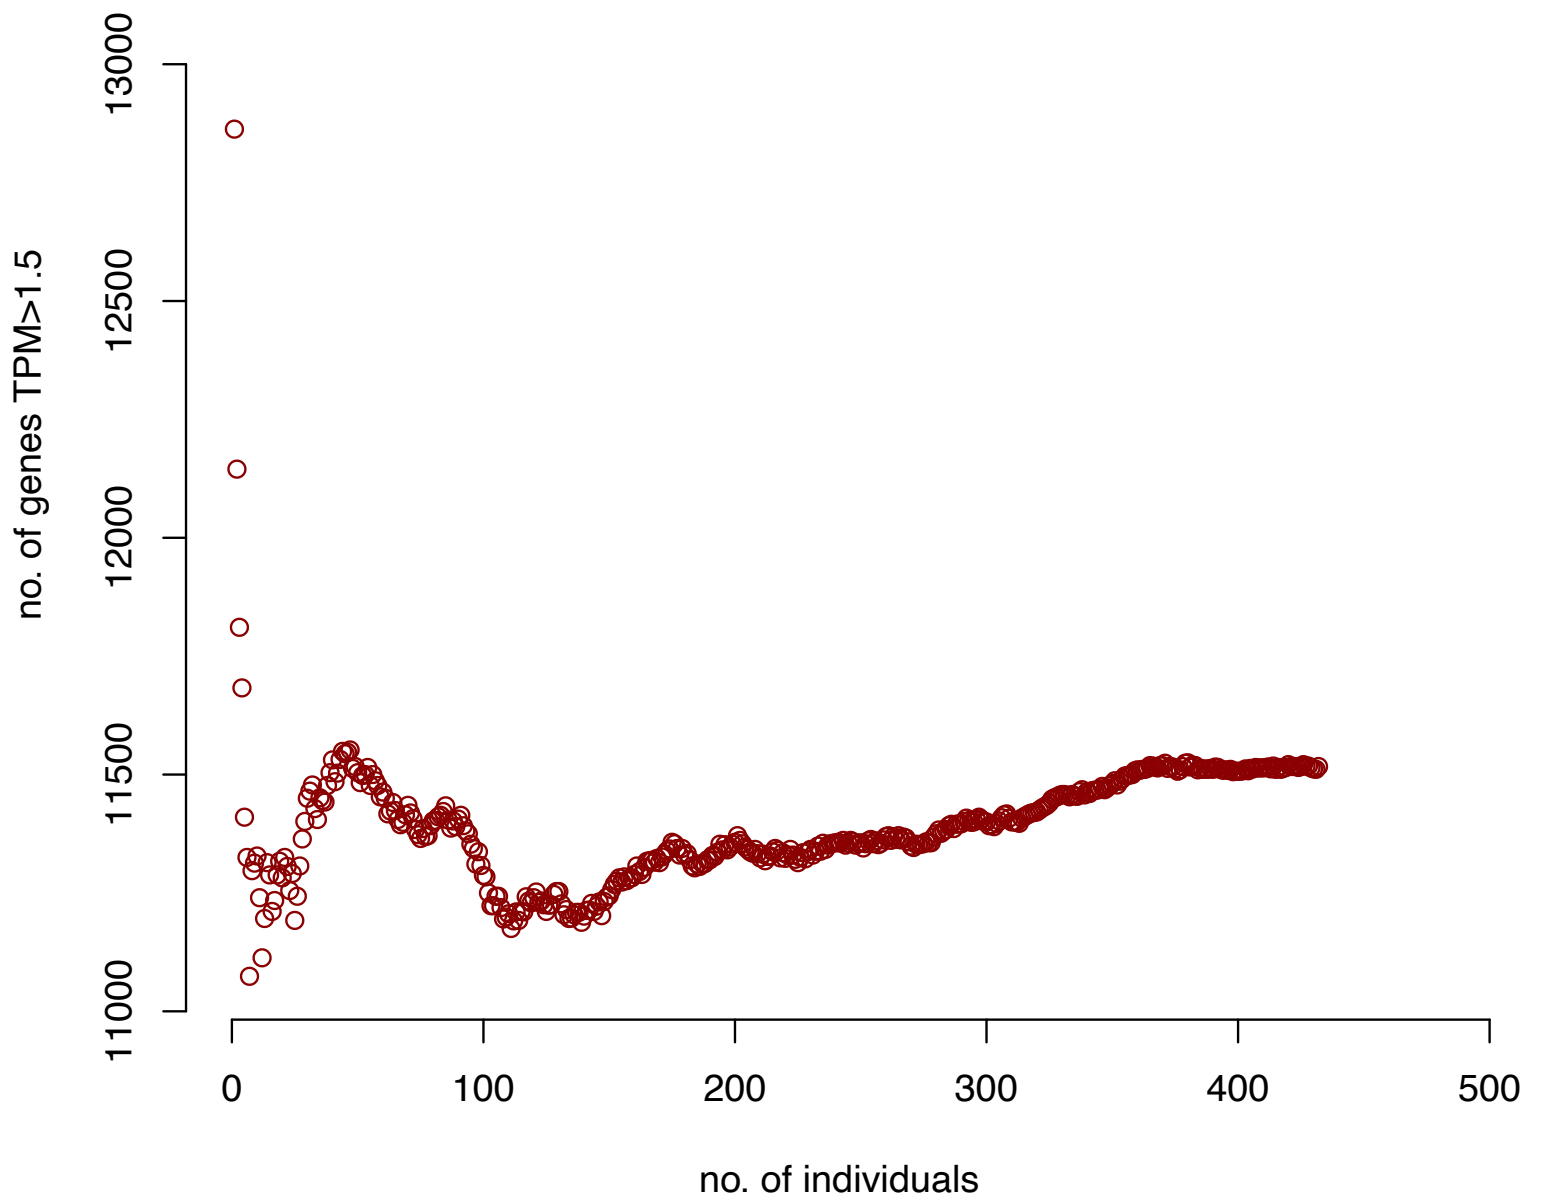

**Gene expression saturation in kidney – cortex tissue  
(total number of samples = 85)**

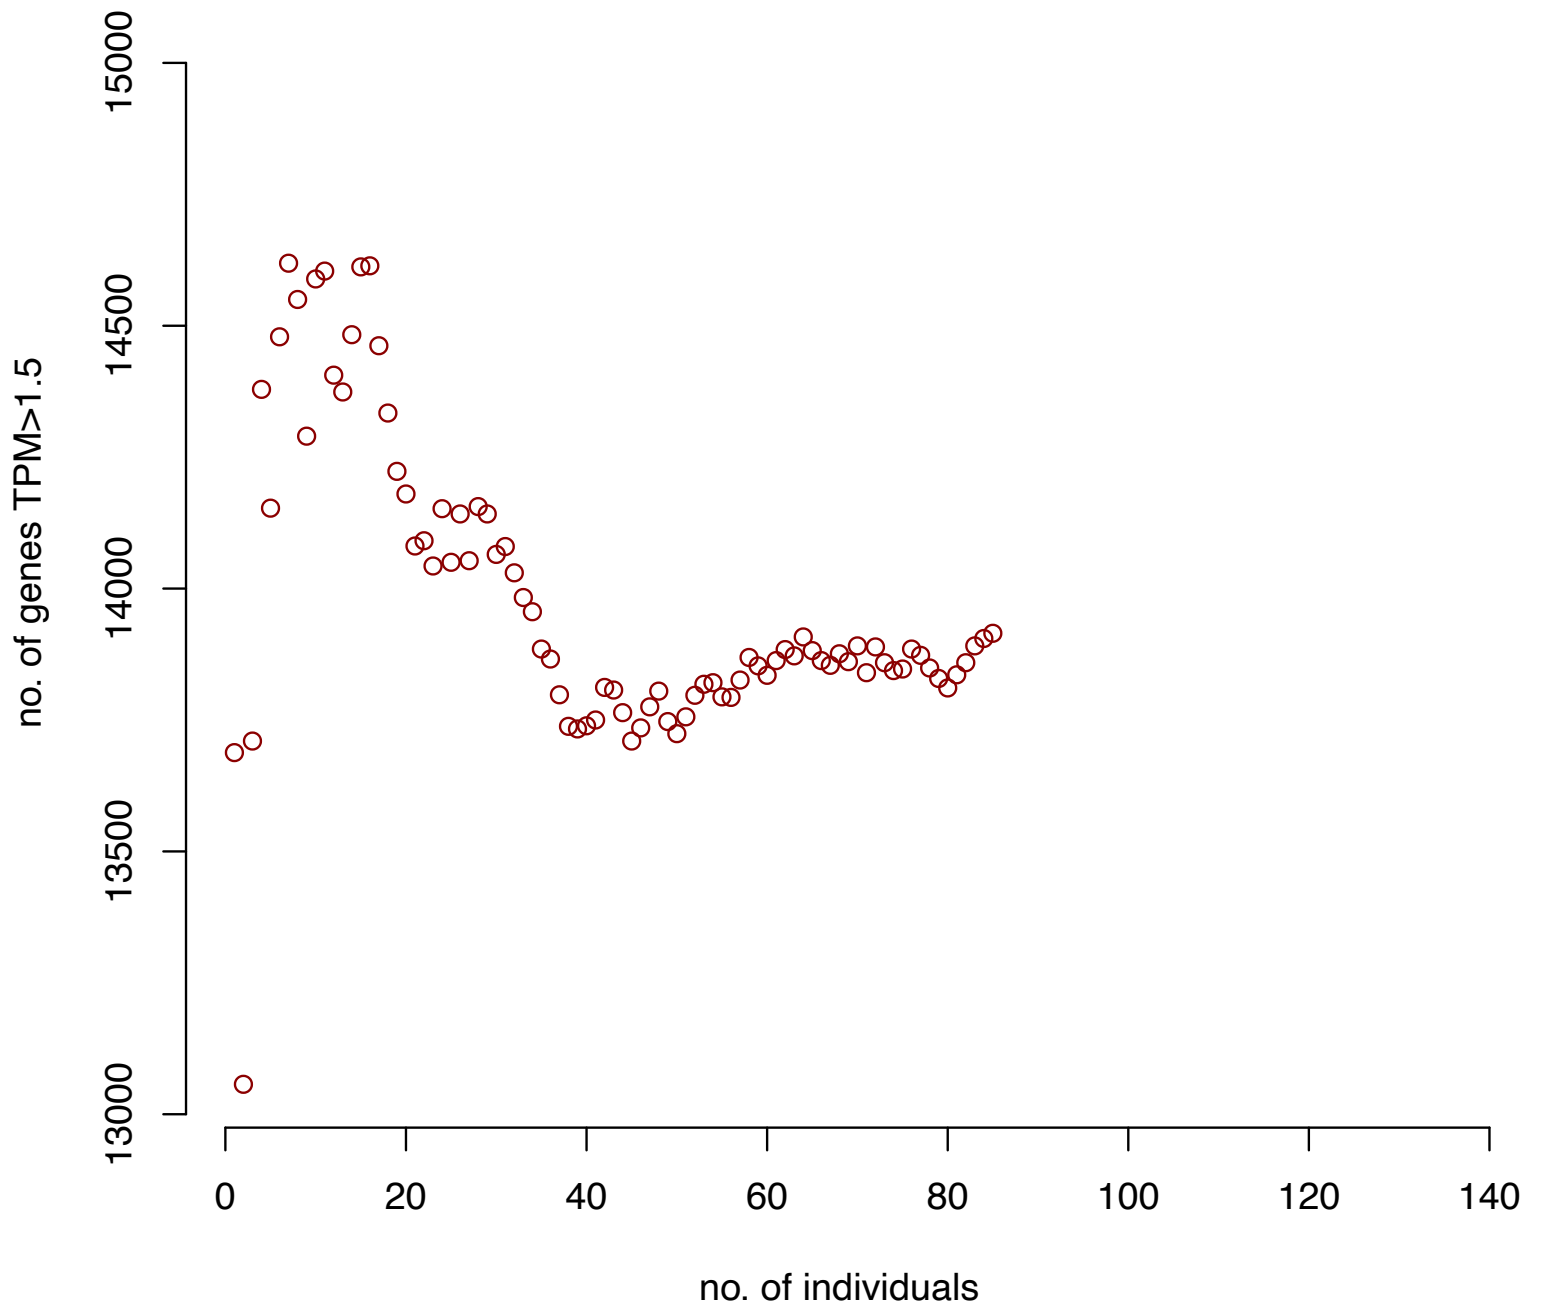

**Gene expression saturation in kidney – medulla tissue  
(total number of samples = 4)**

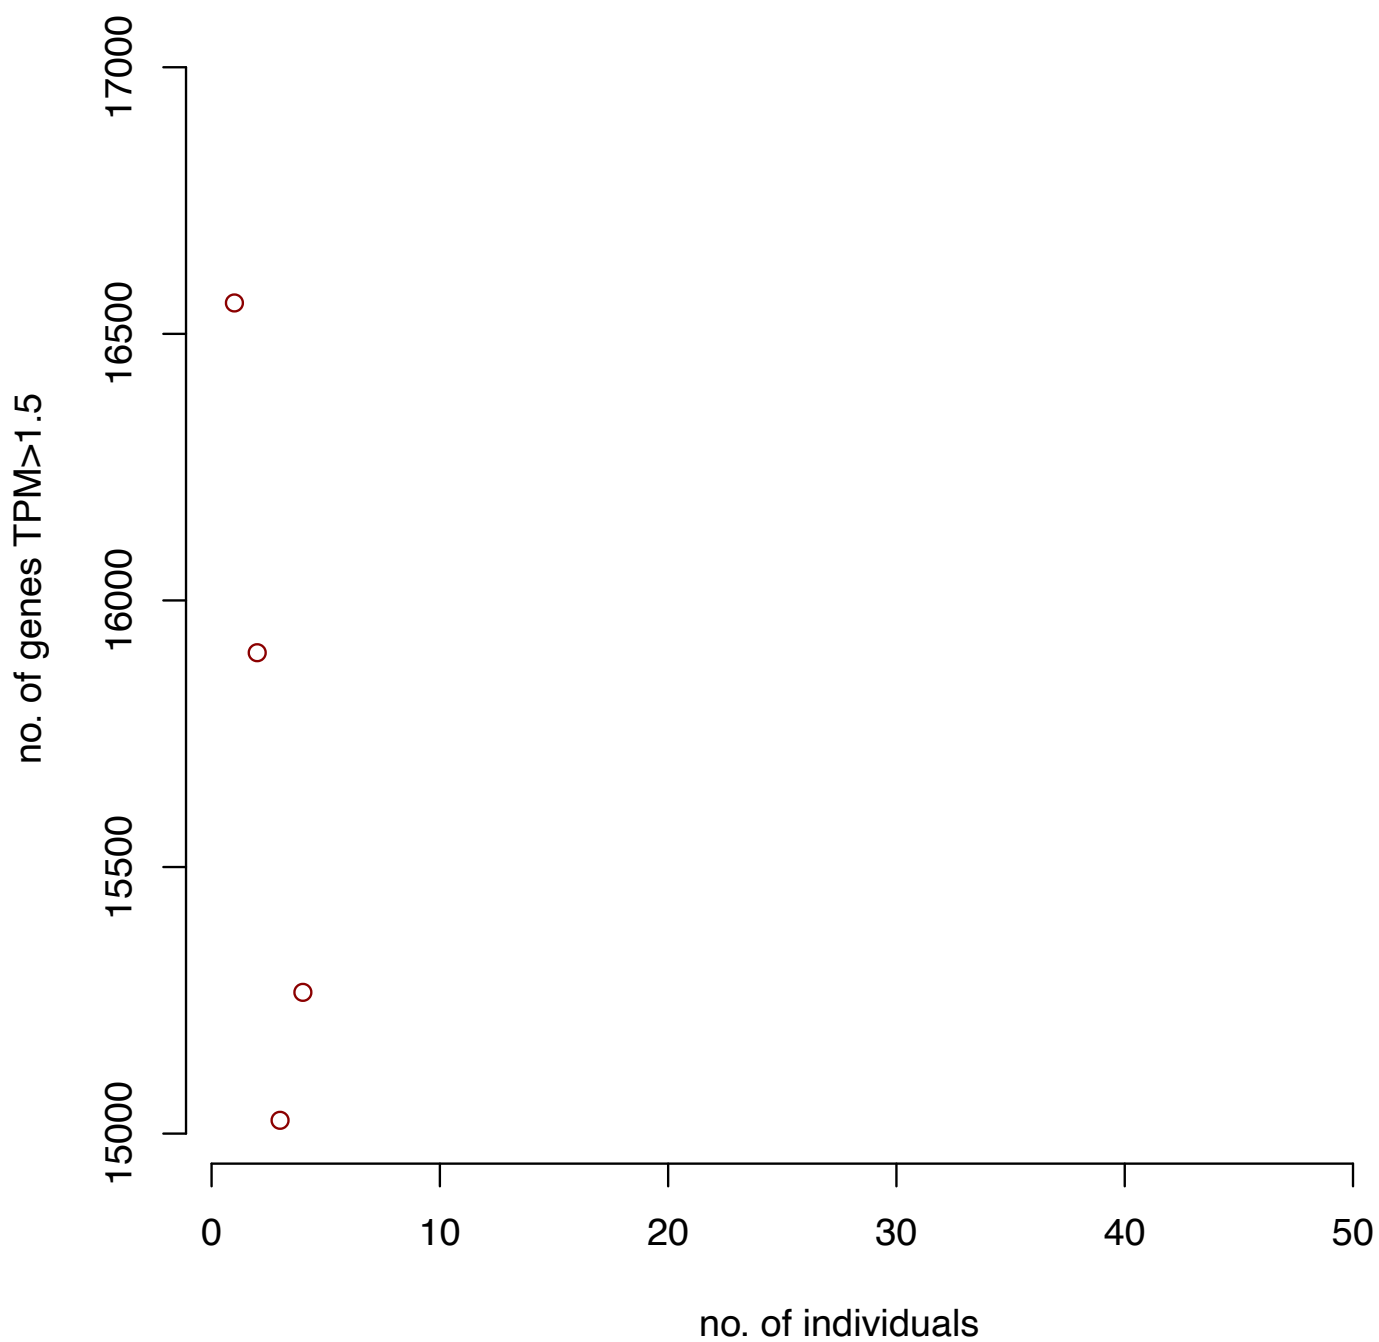

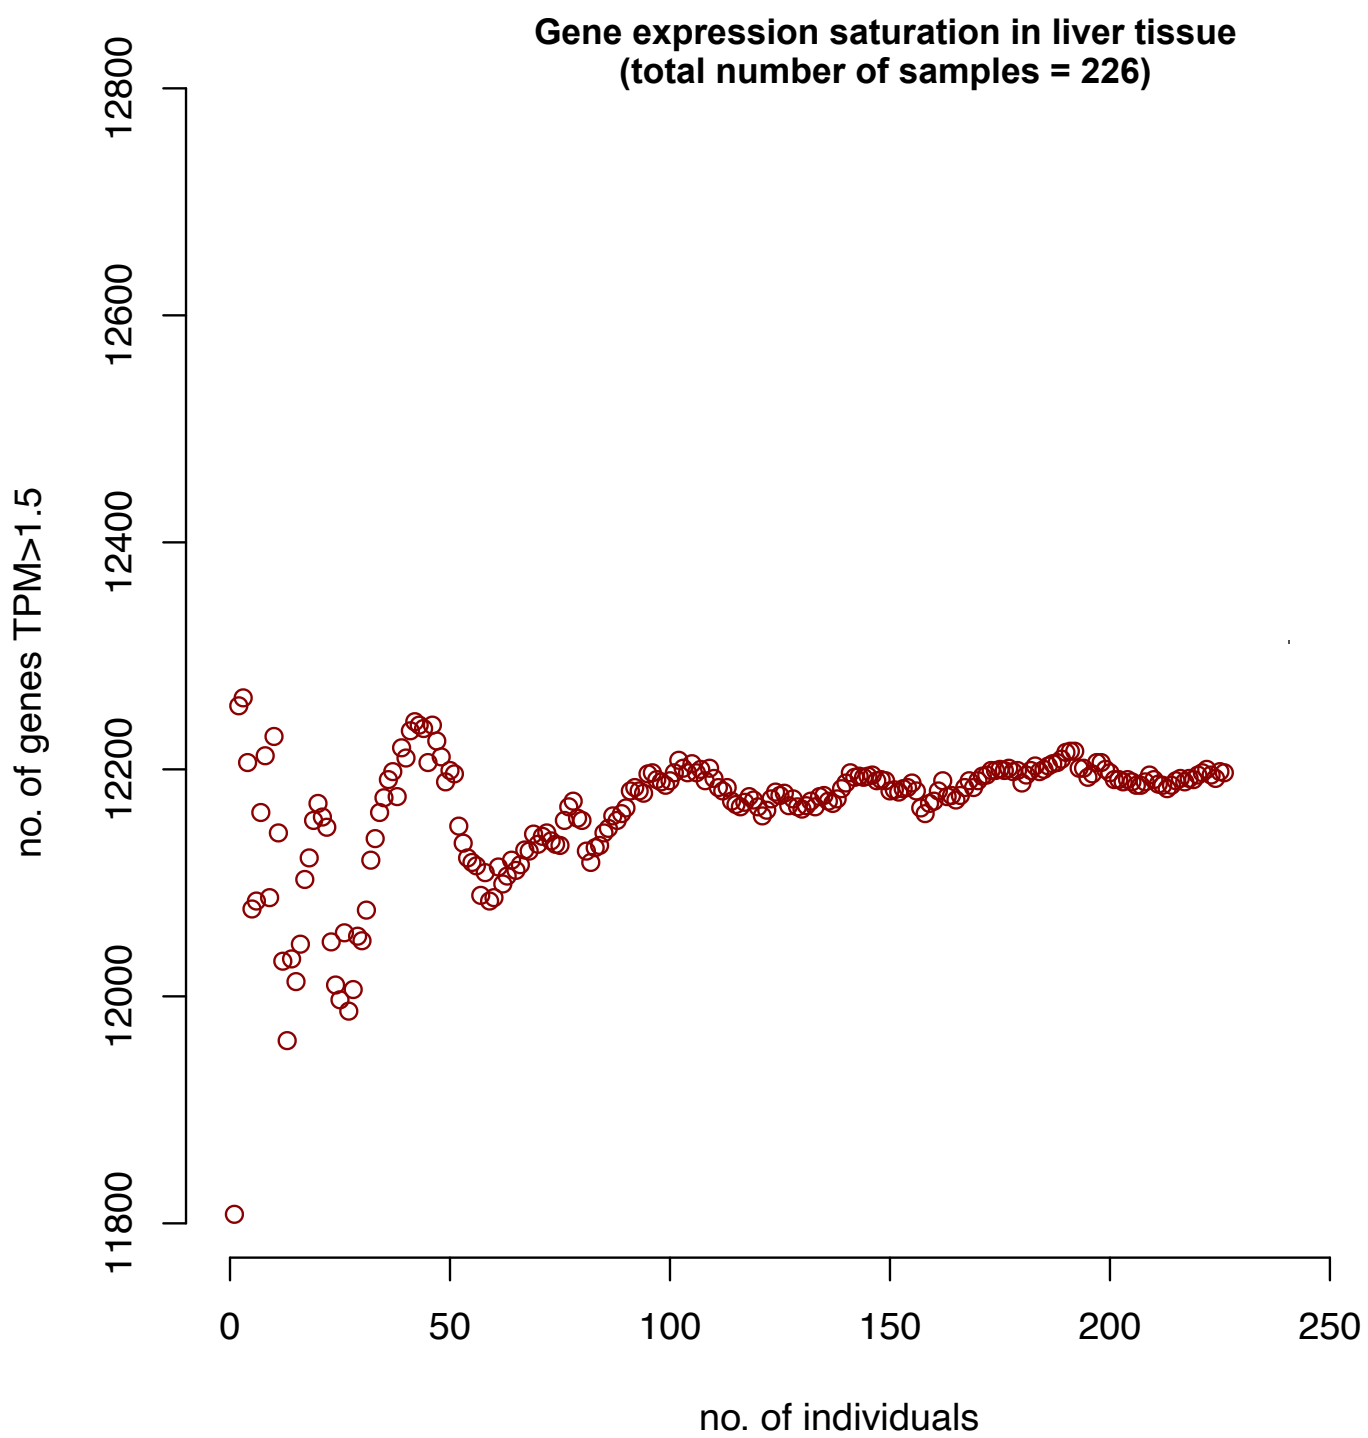

**Gene expression saturation in lung tissue**  
(total number of samples = 578)

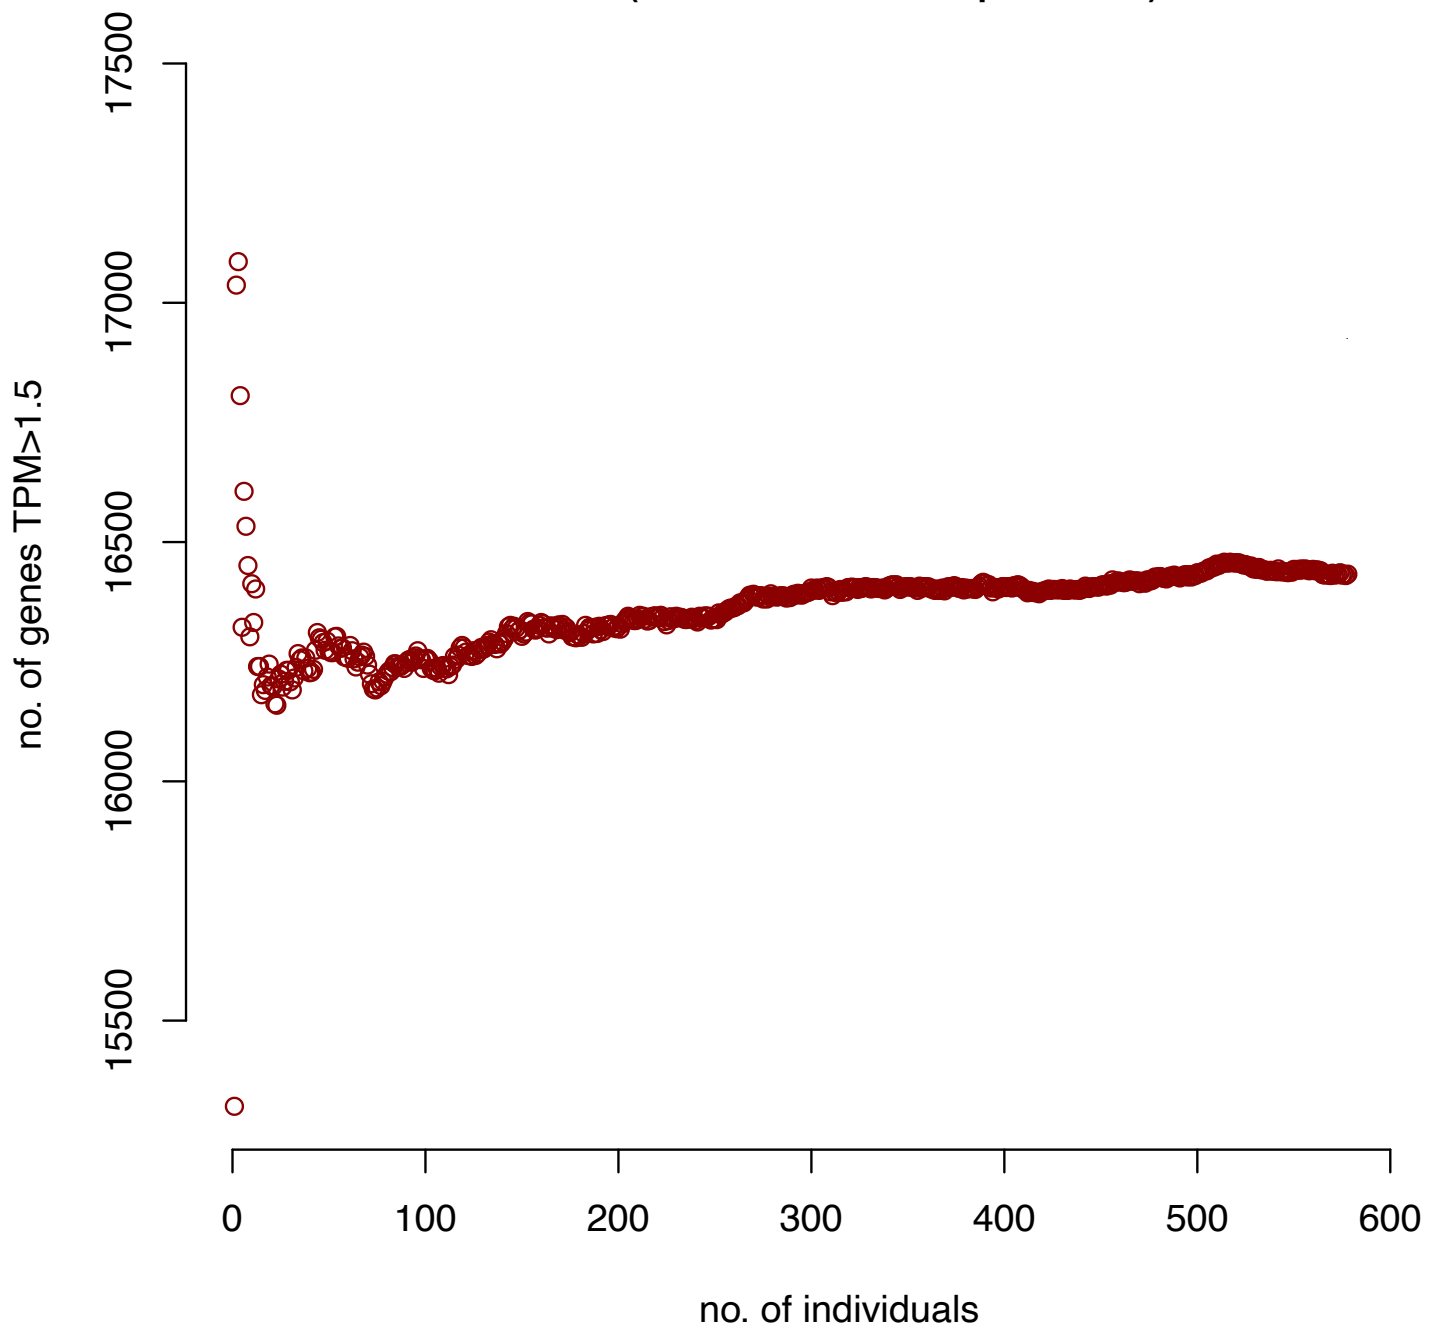

**Gene expression saturation in minor salivary gland tissue  
(total number of samples = 162)**

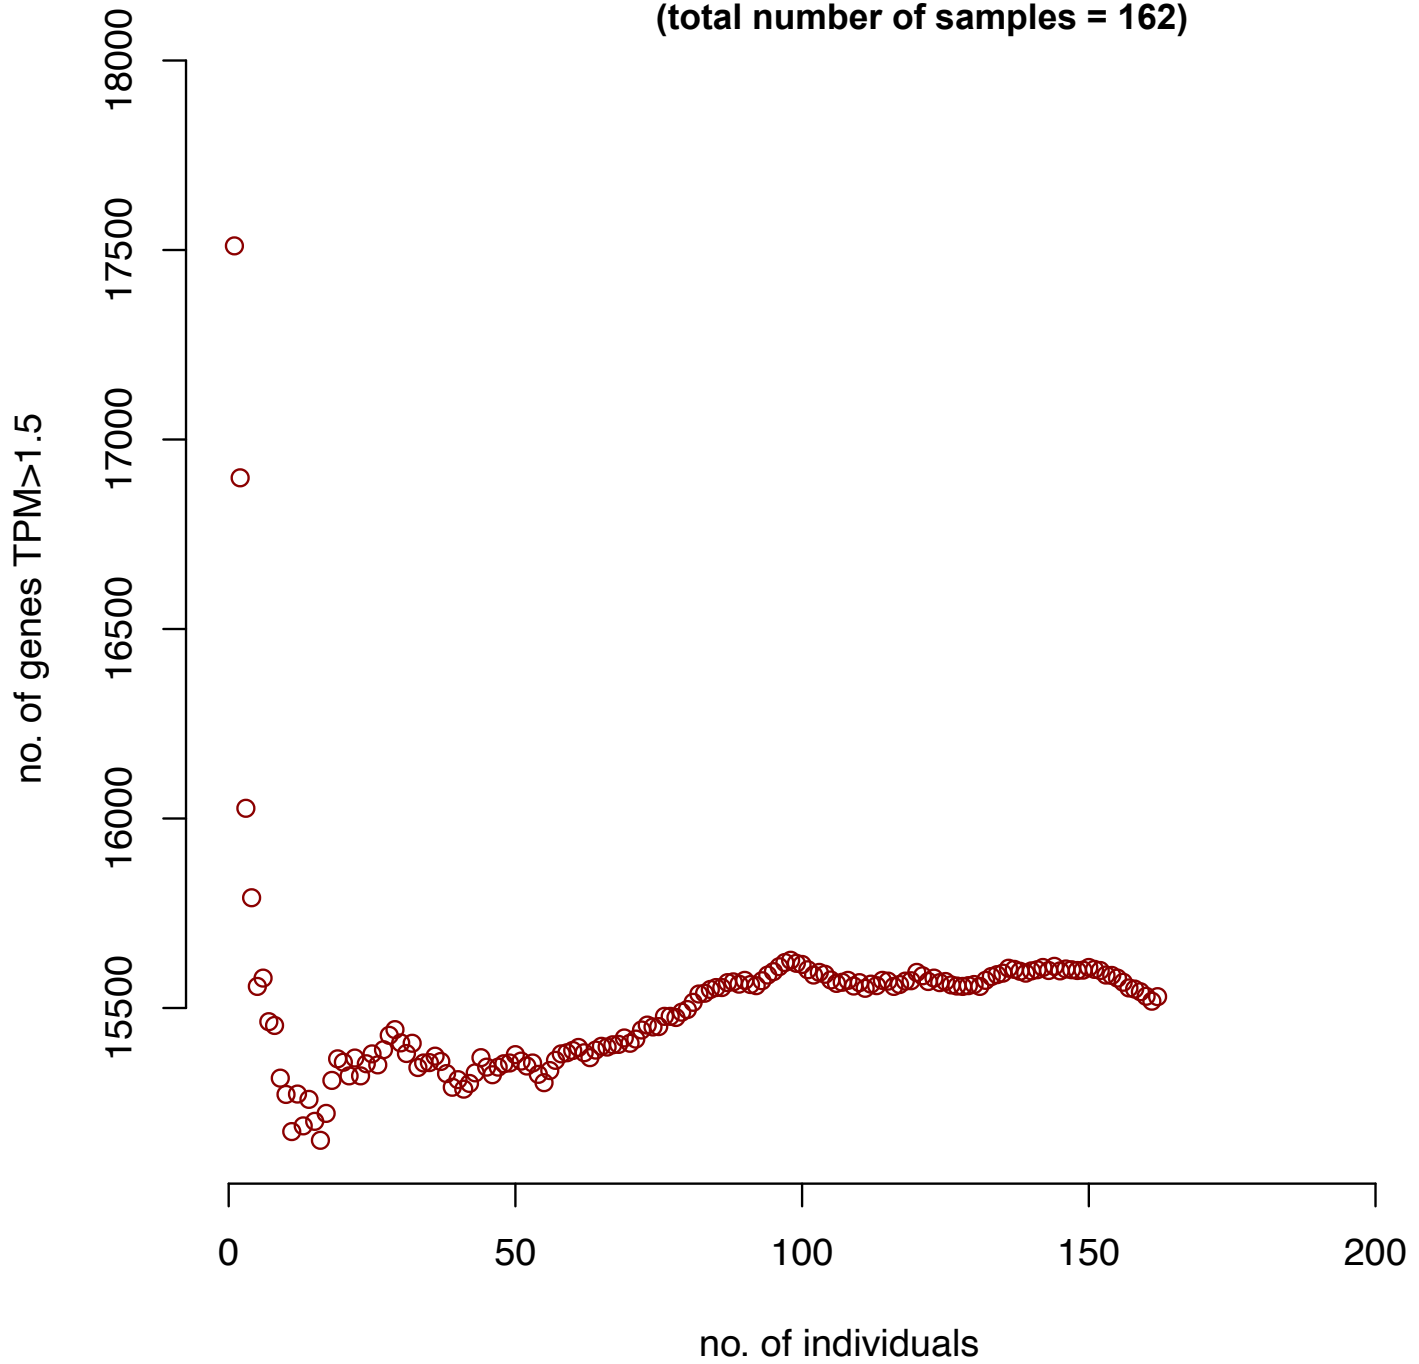

**Gene expression saturation in skeletal muscle tissue  
(total number of samples = 803)**

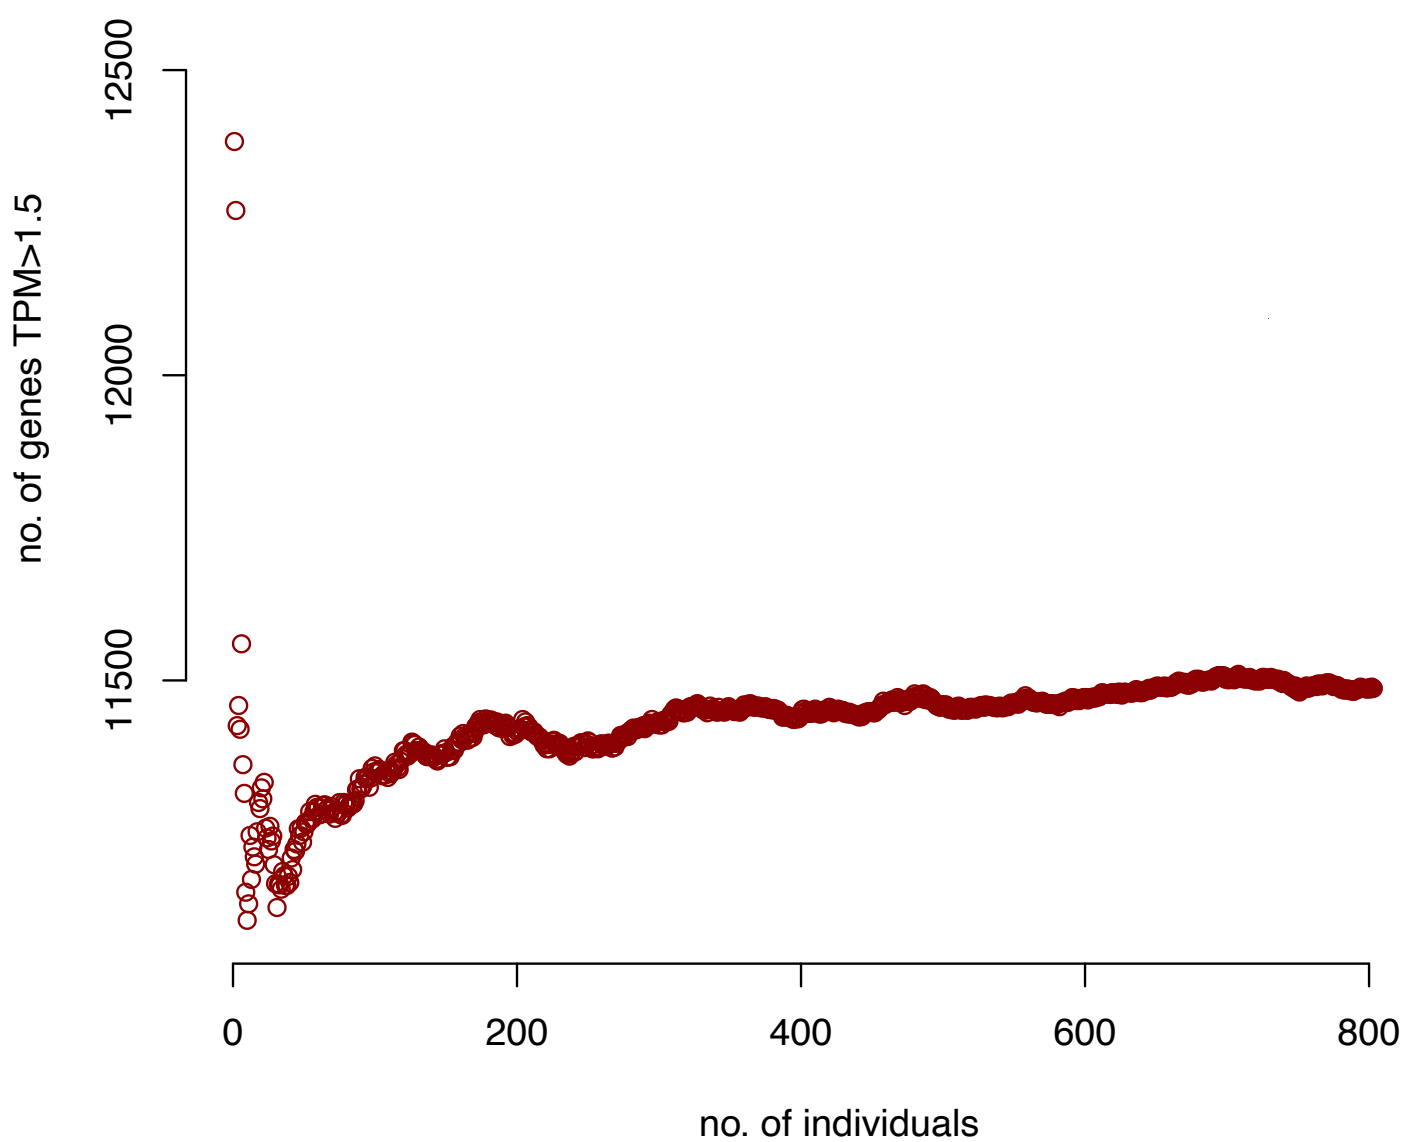

**Gene expression saturation in tibial nerve tissue  
(total number of samples = 619)**

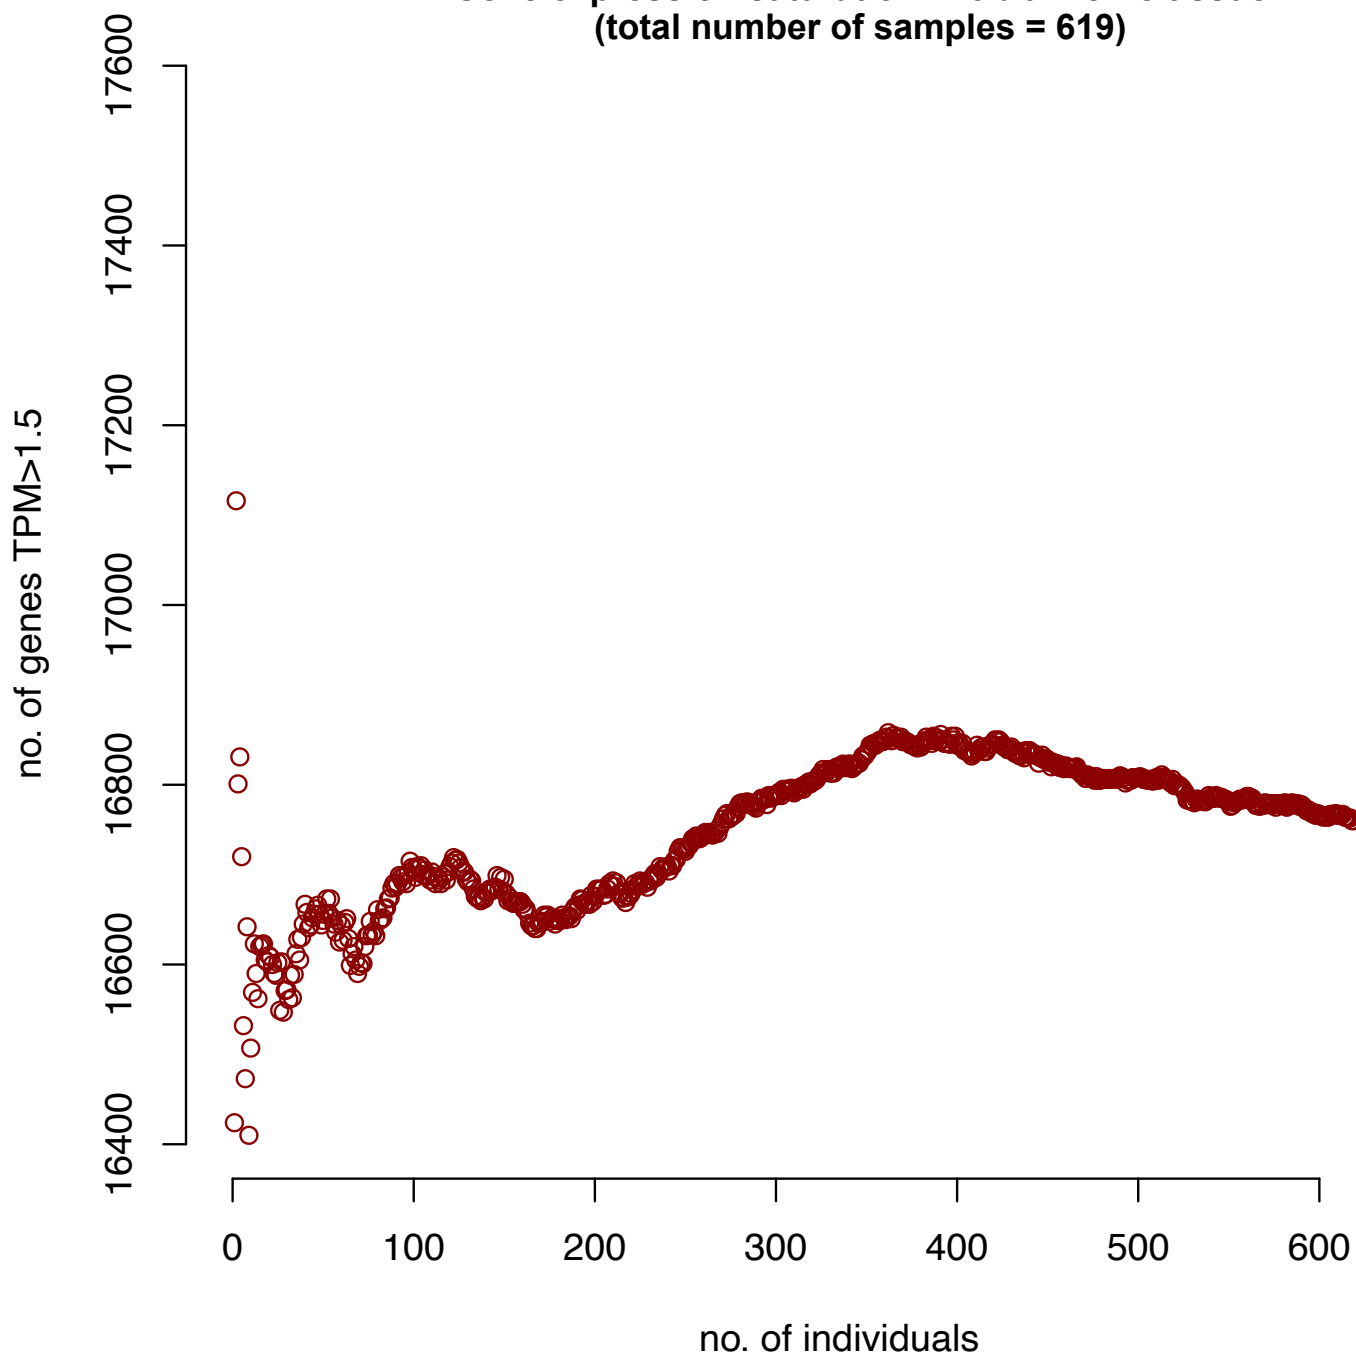

**Gene expression saturation in ovary tissue  
(total number of samples = 180)**

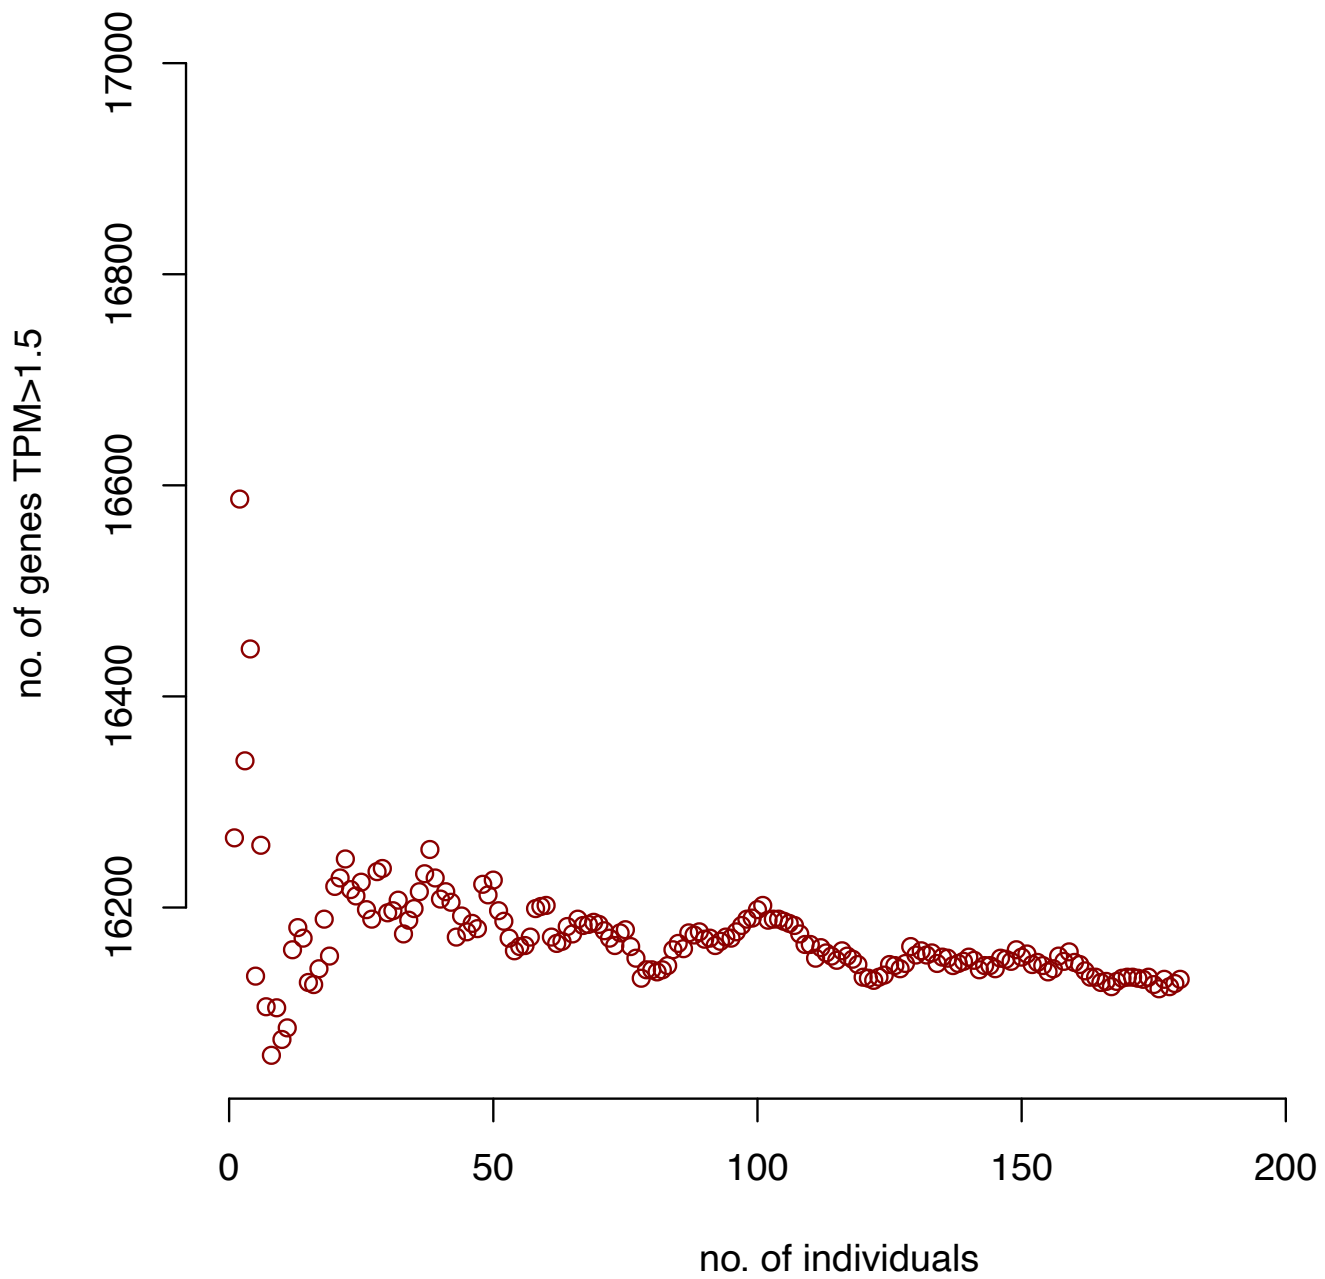

**Gene expression saturation of pancreas tissue  
(total number of samples = 328)**

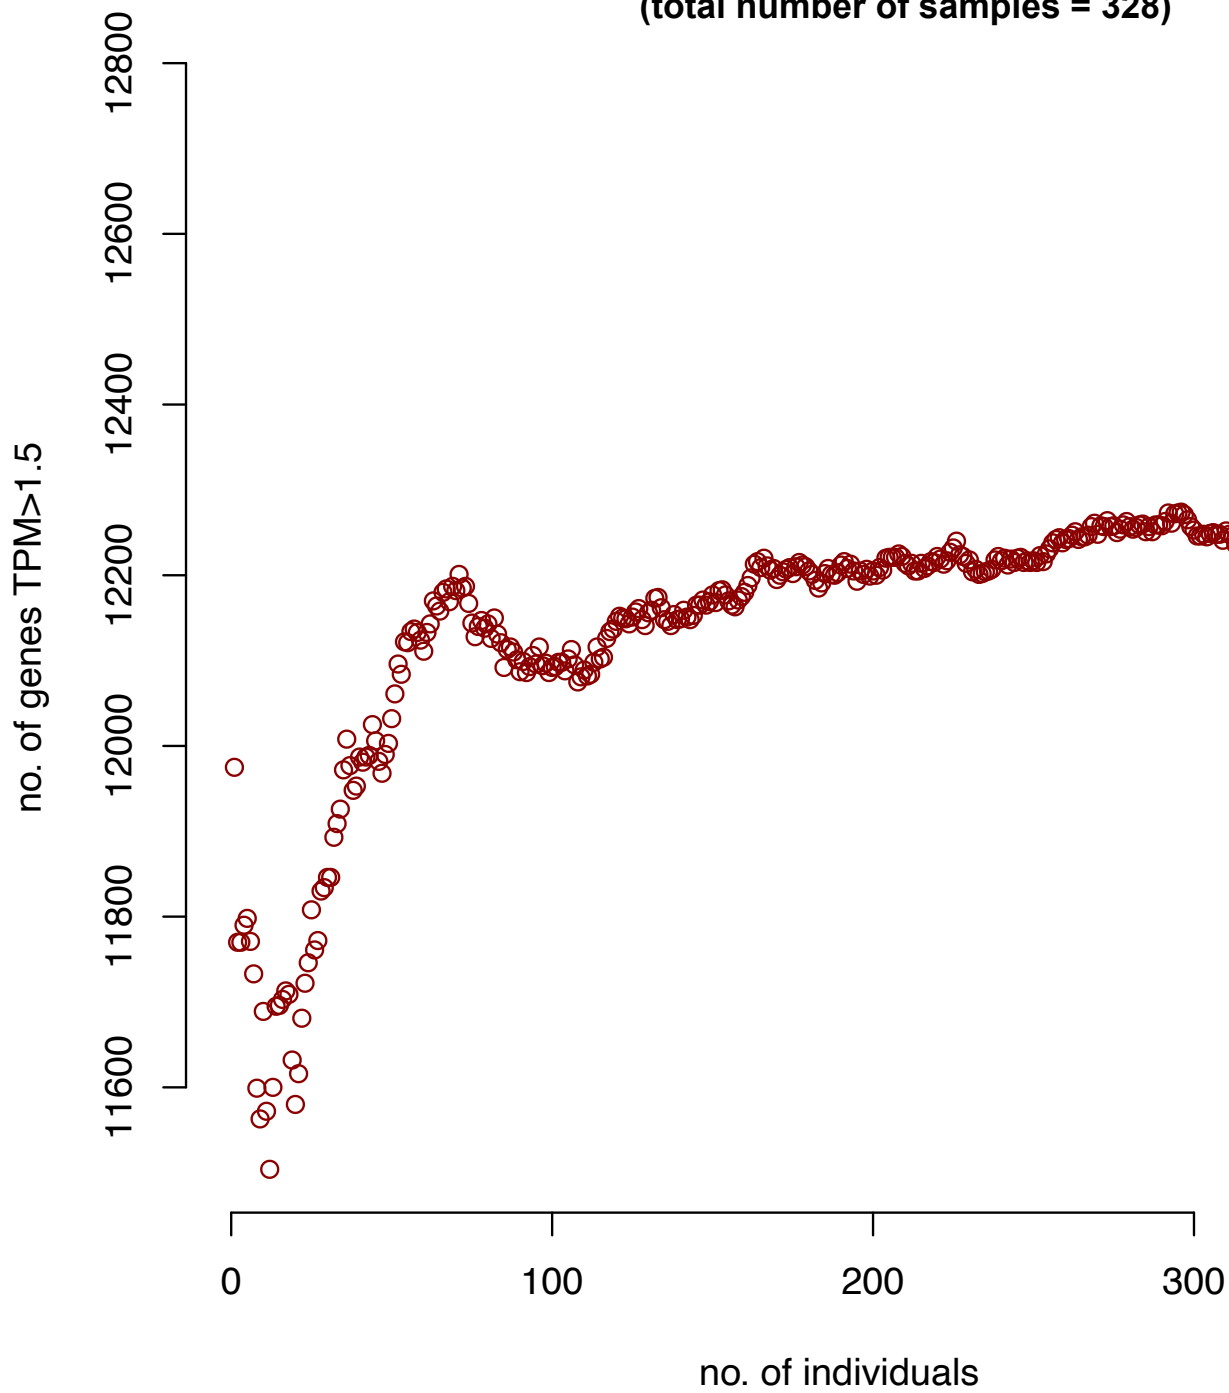

**Gene expression saturation in pituitary tissue  
(total number of samples = 283)**

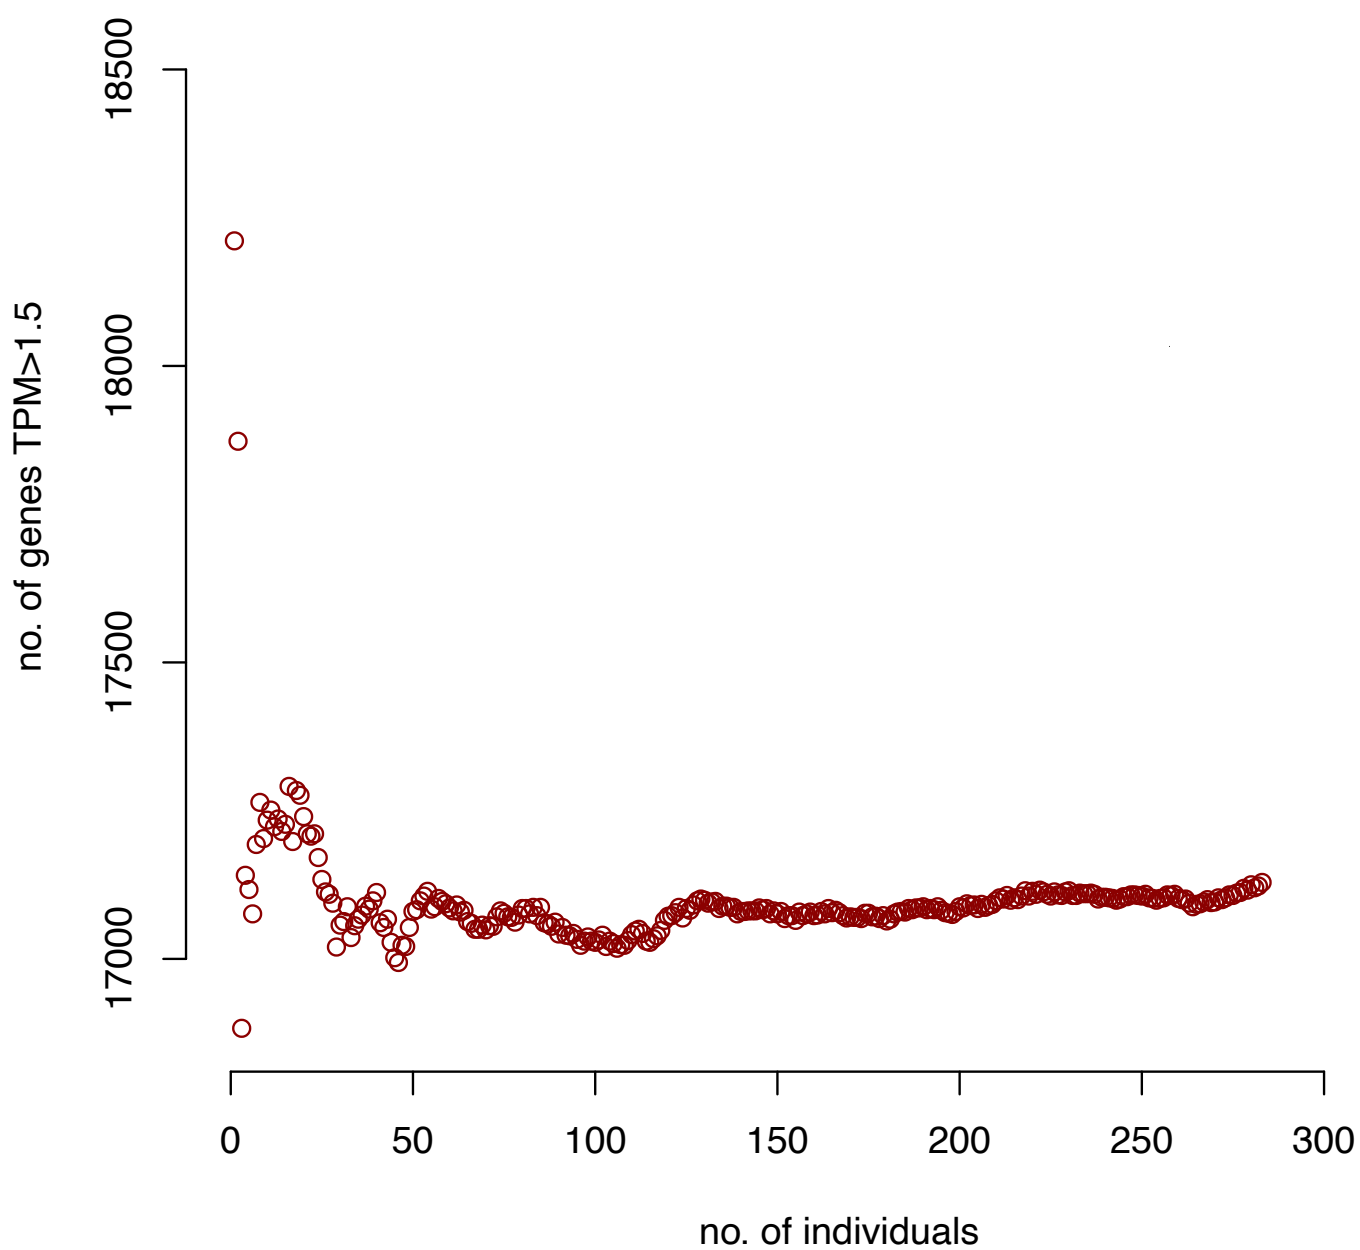

**Gene expression saturation in prostate tissue  
(total number of samples = 245)**

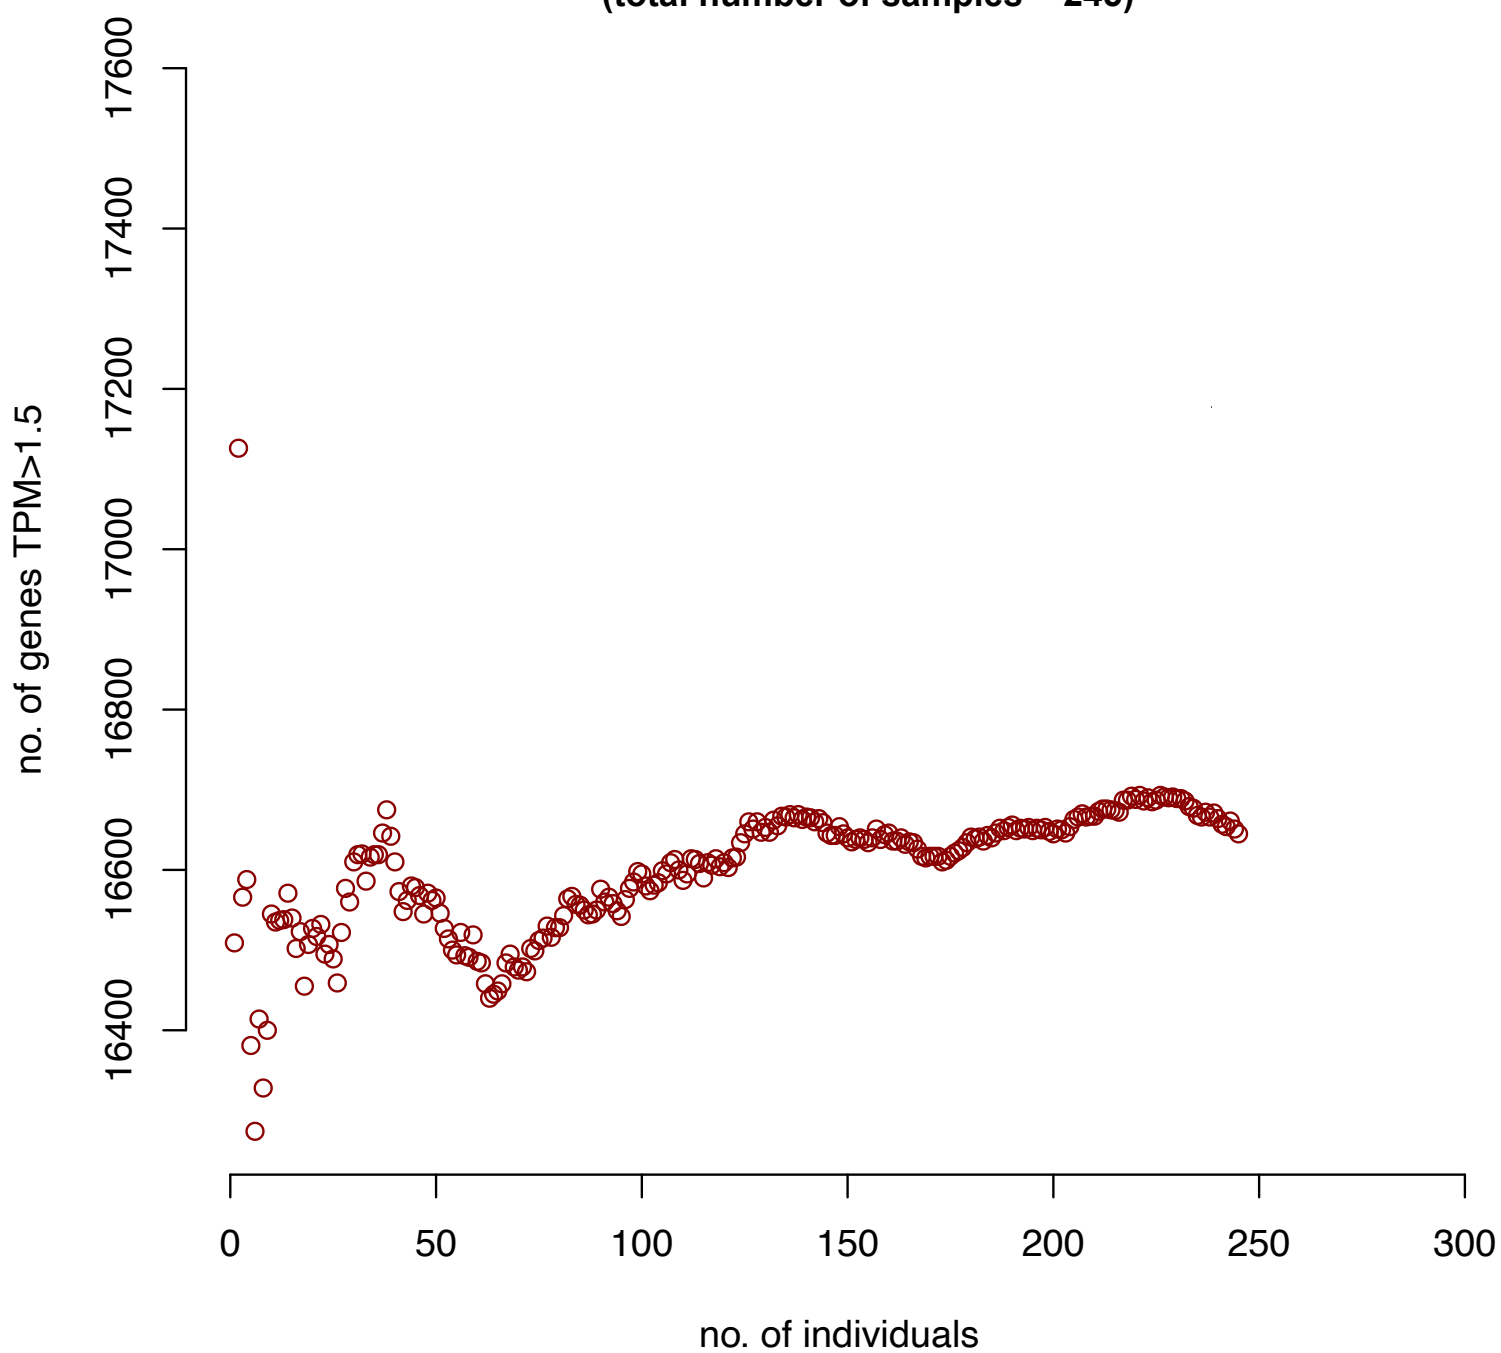

Gene expression saturation in skin – not sun exposed tissue  
(total number of samples = 604)

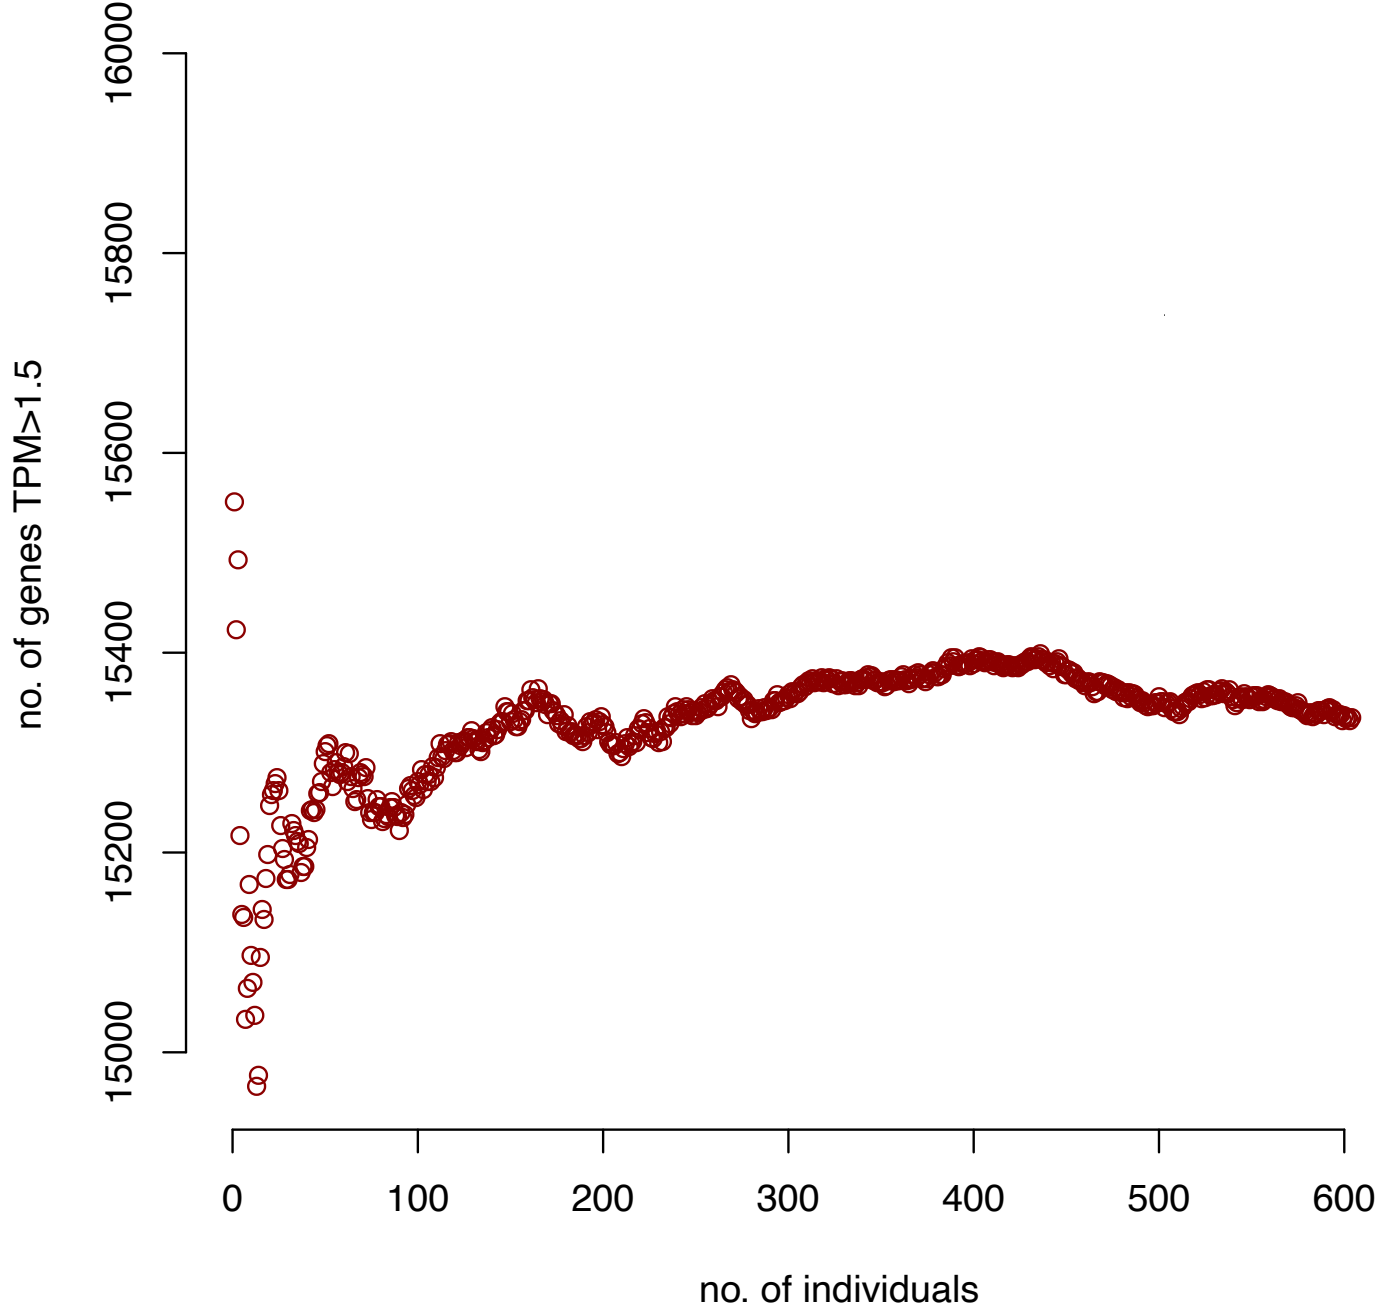

**Gene expression saturation in skin – sun exposed tissue  
(total number of samples = 701)**

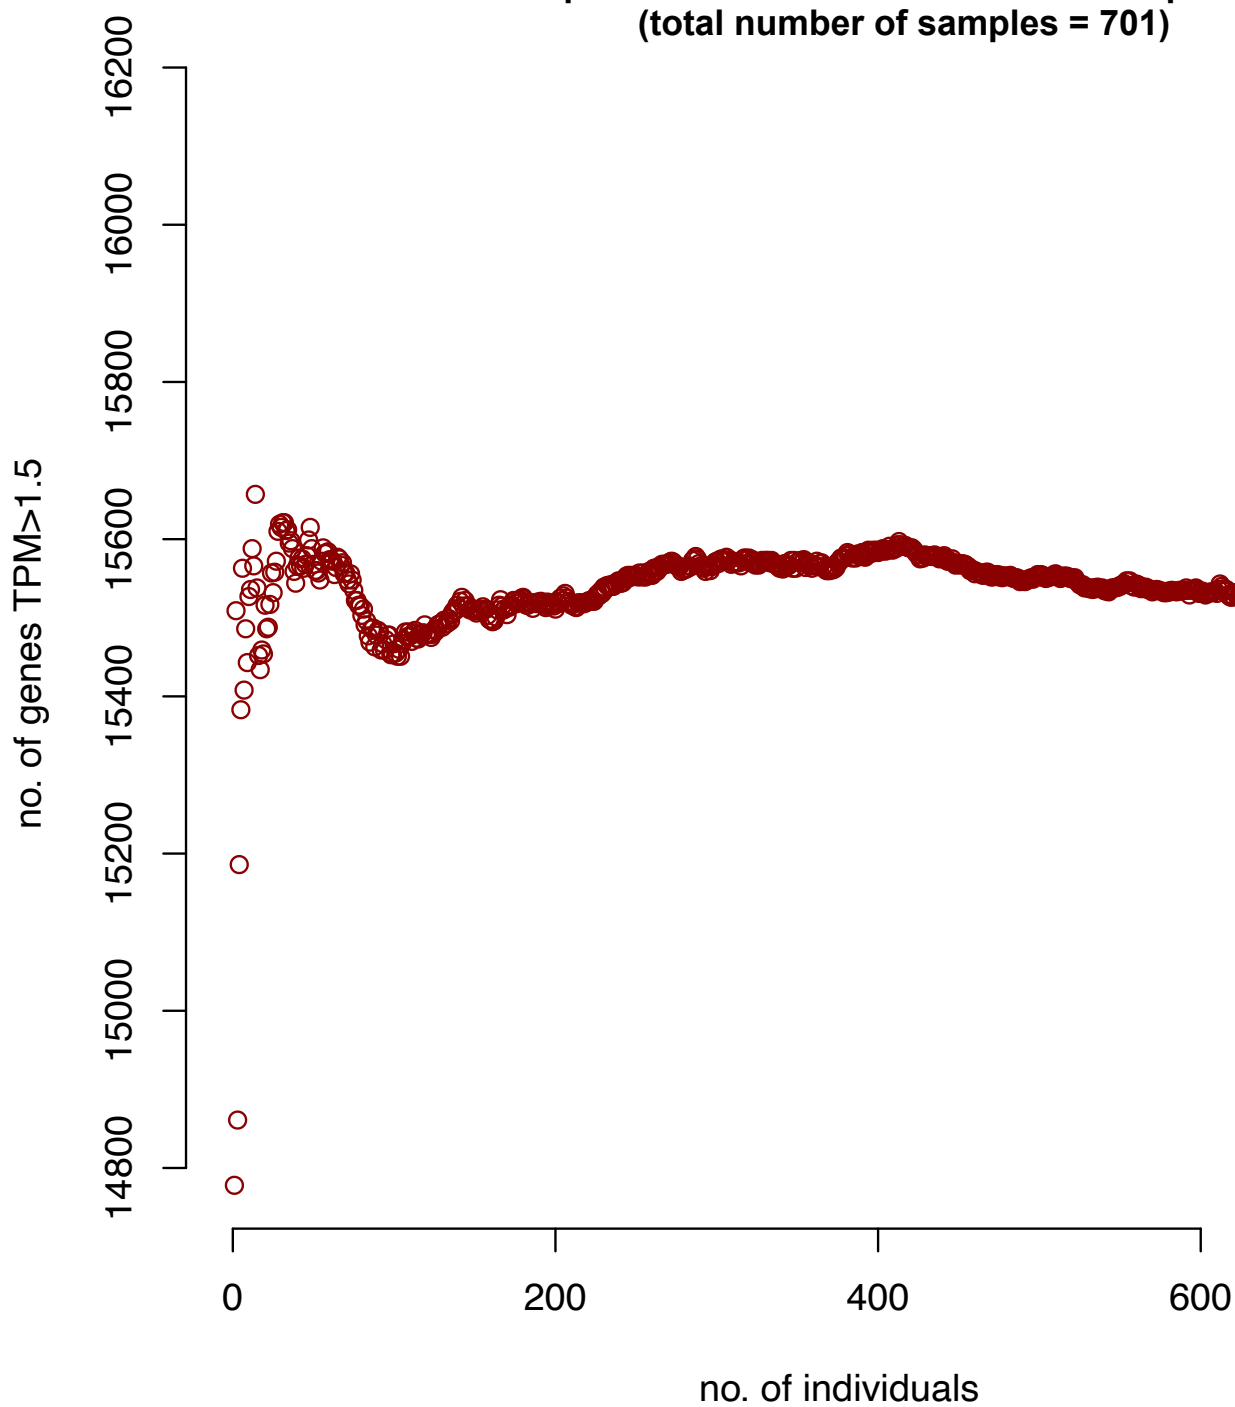

**Gene expression saturation in small intestine – terminal ileum tissue  
(total number of samples = 187)**

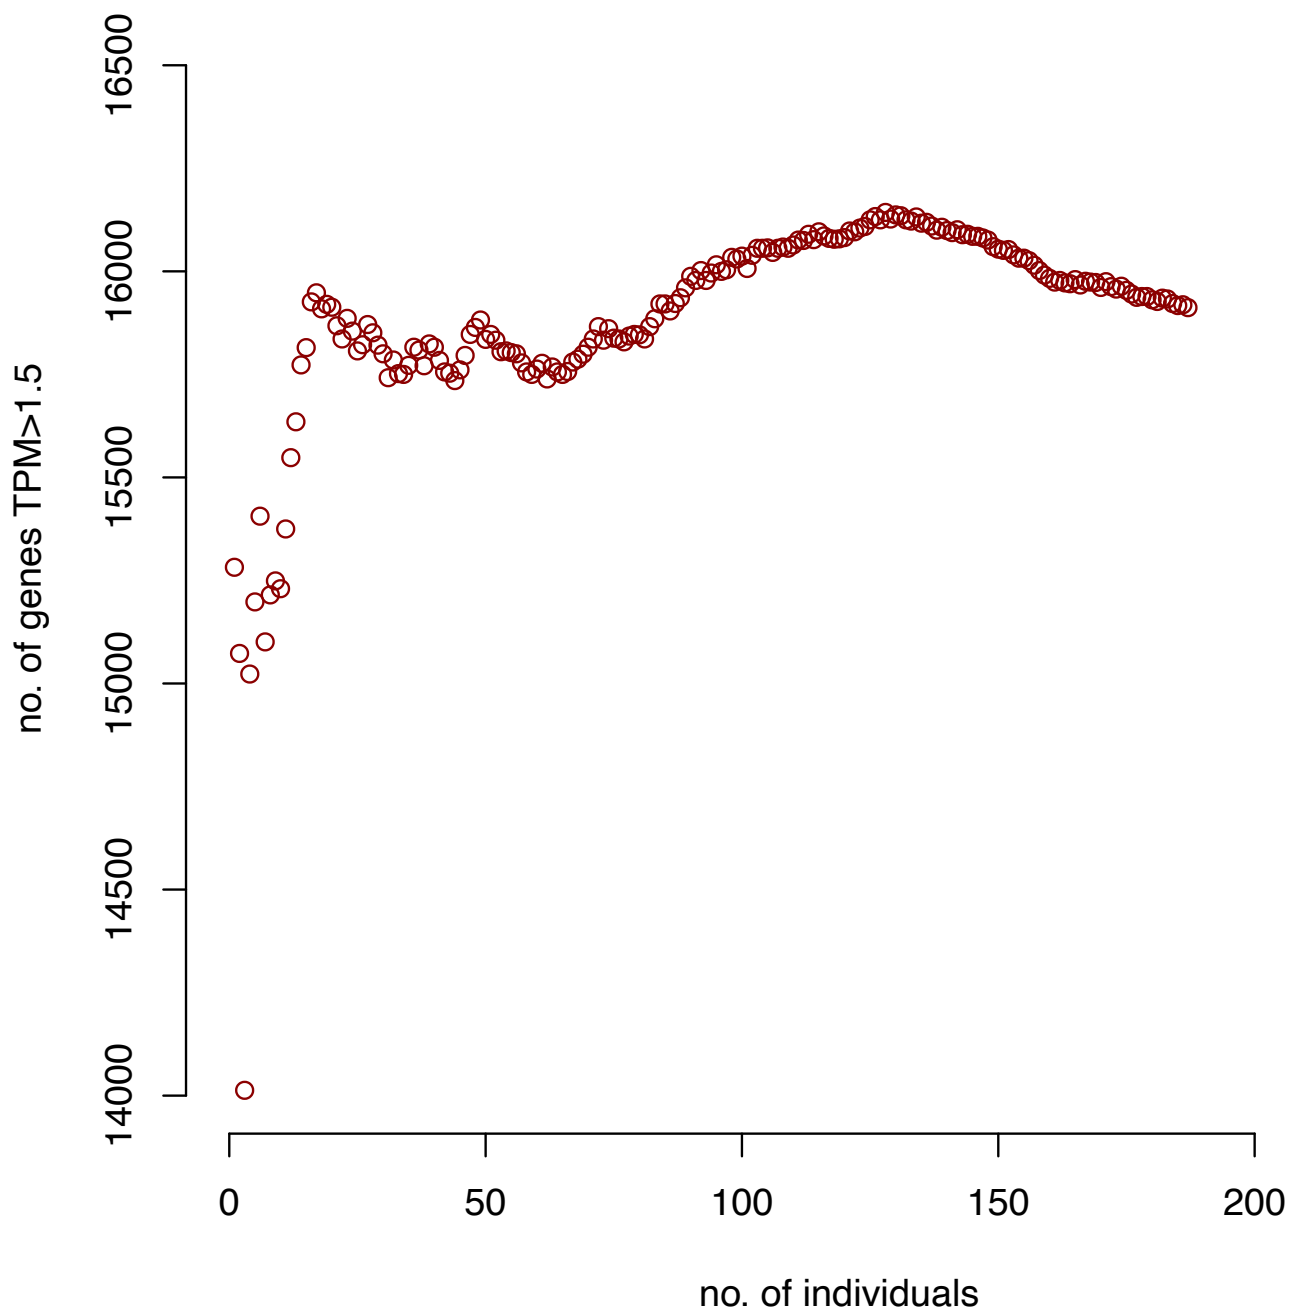

**Gene expression saturation in spleen tissue  
(total number of samples = 241)**

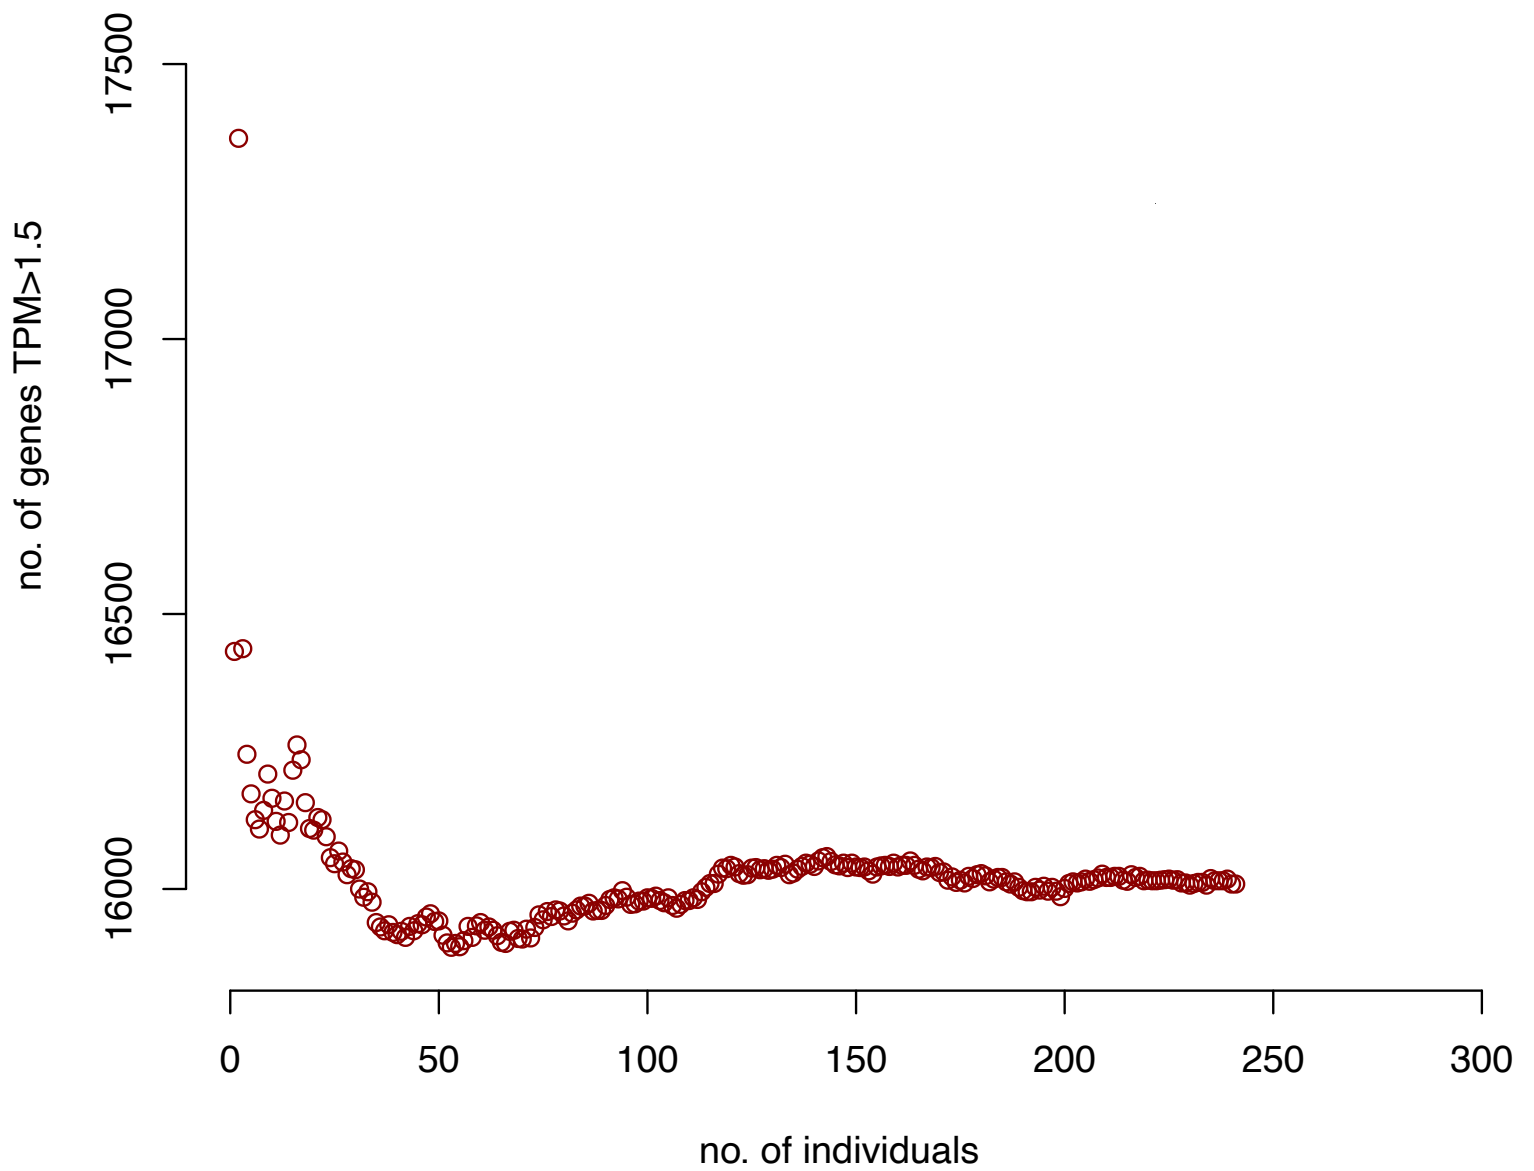

**Gene expression saturation in stomach tissue**  
(total number of samples = 359)

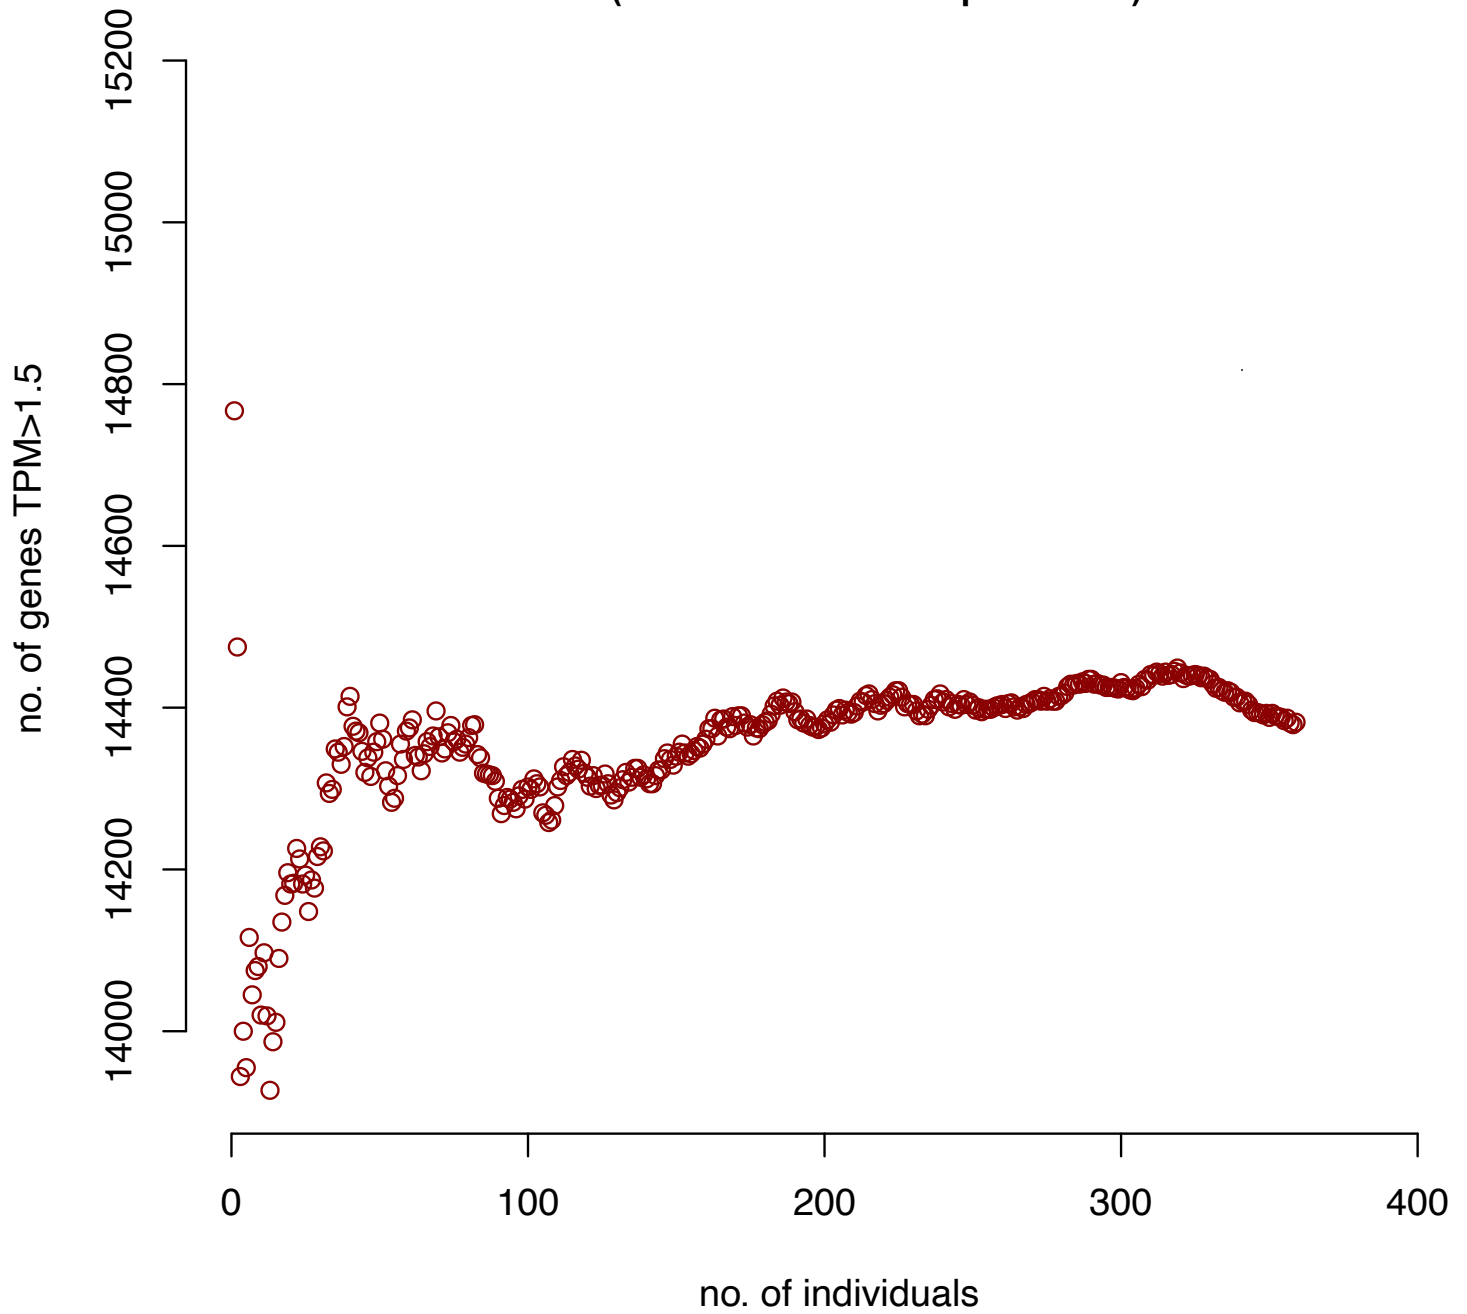

**Gene expression saturation in testis tissue**  
(total number of samples = 361)

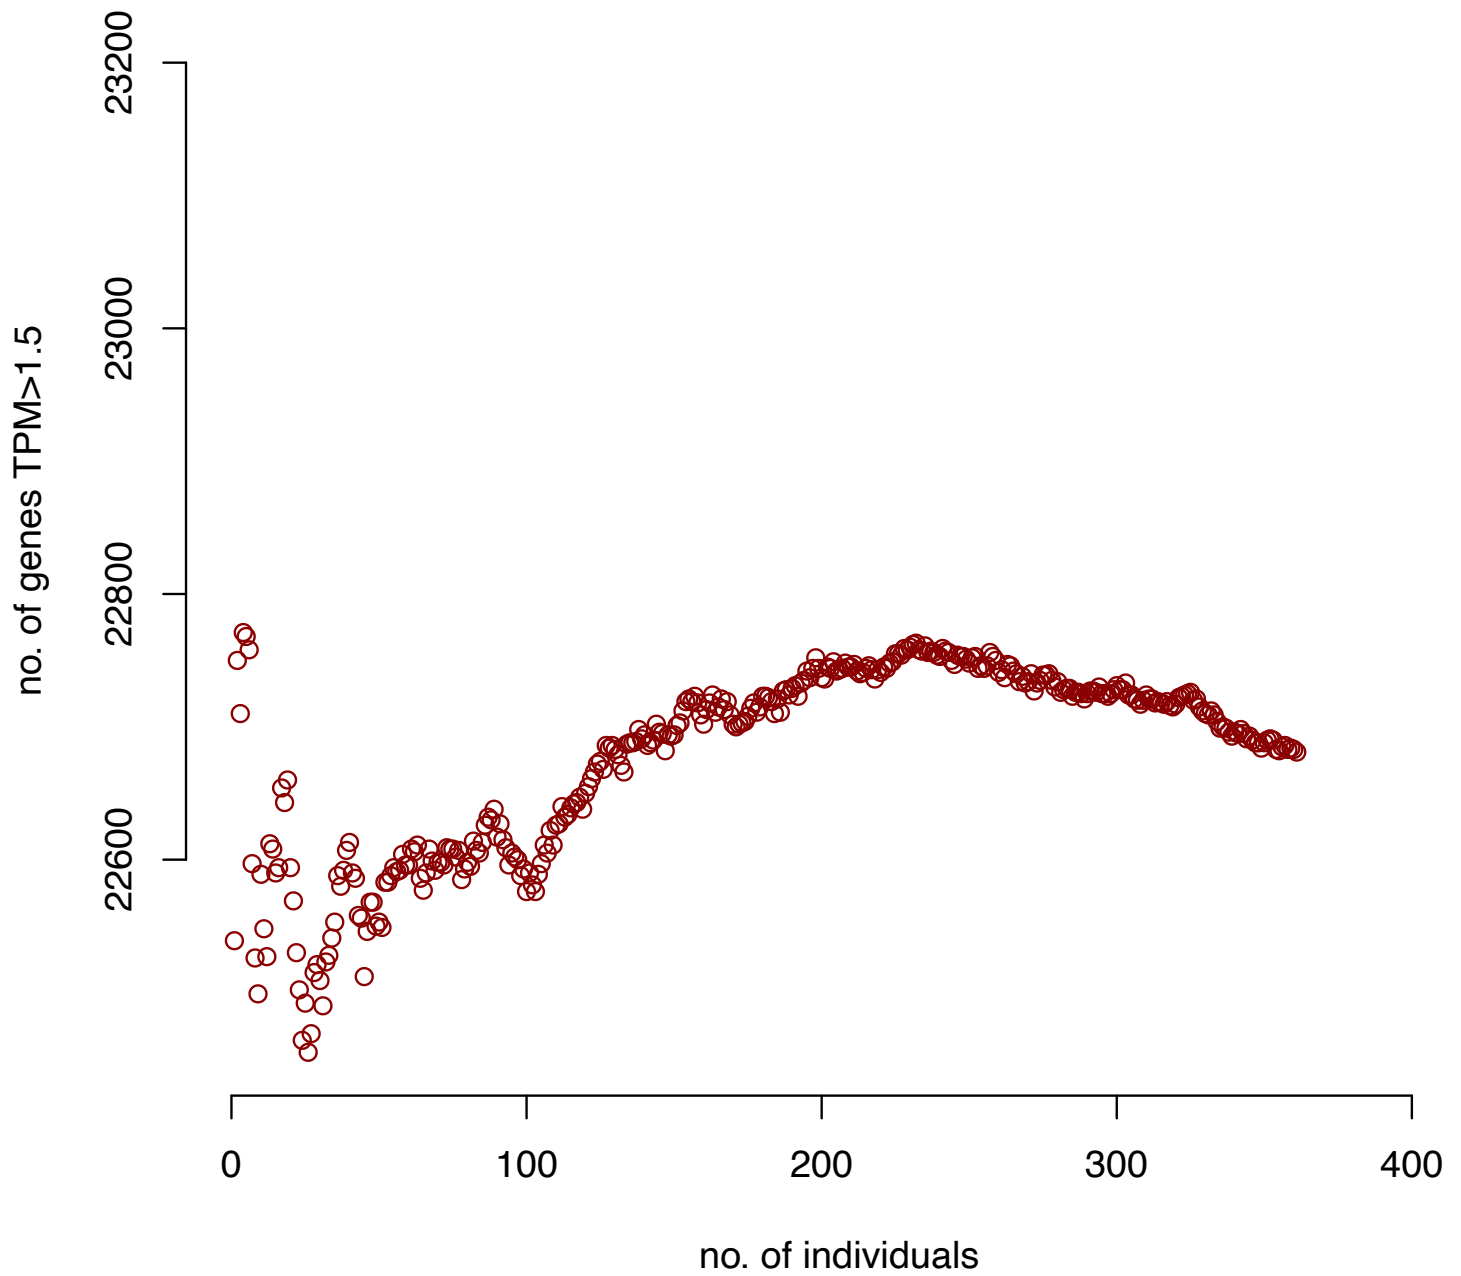

**Gene expression saturation in thyroid tissue  
(total number of samples = 653)**

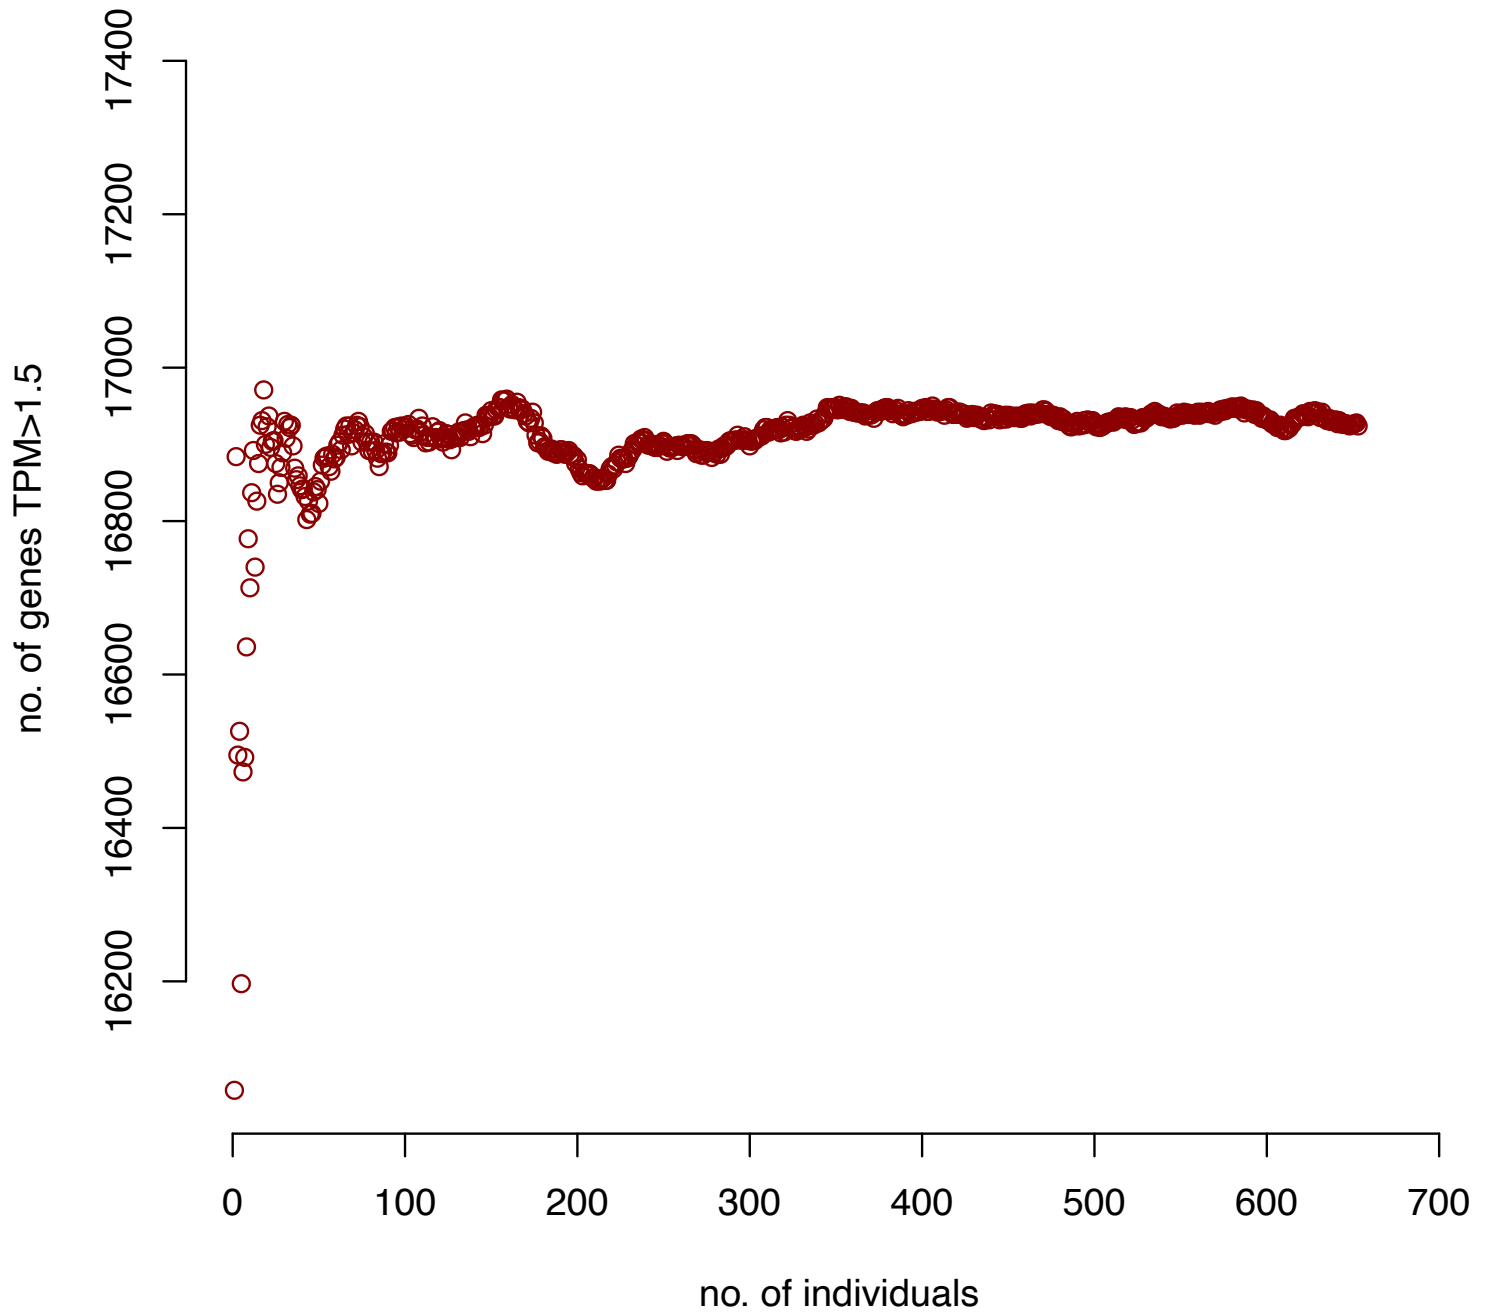

**Gene expression saturation in uterus tissue  
(total number of samples = 142)**

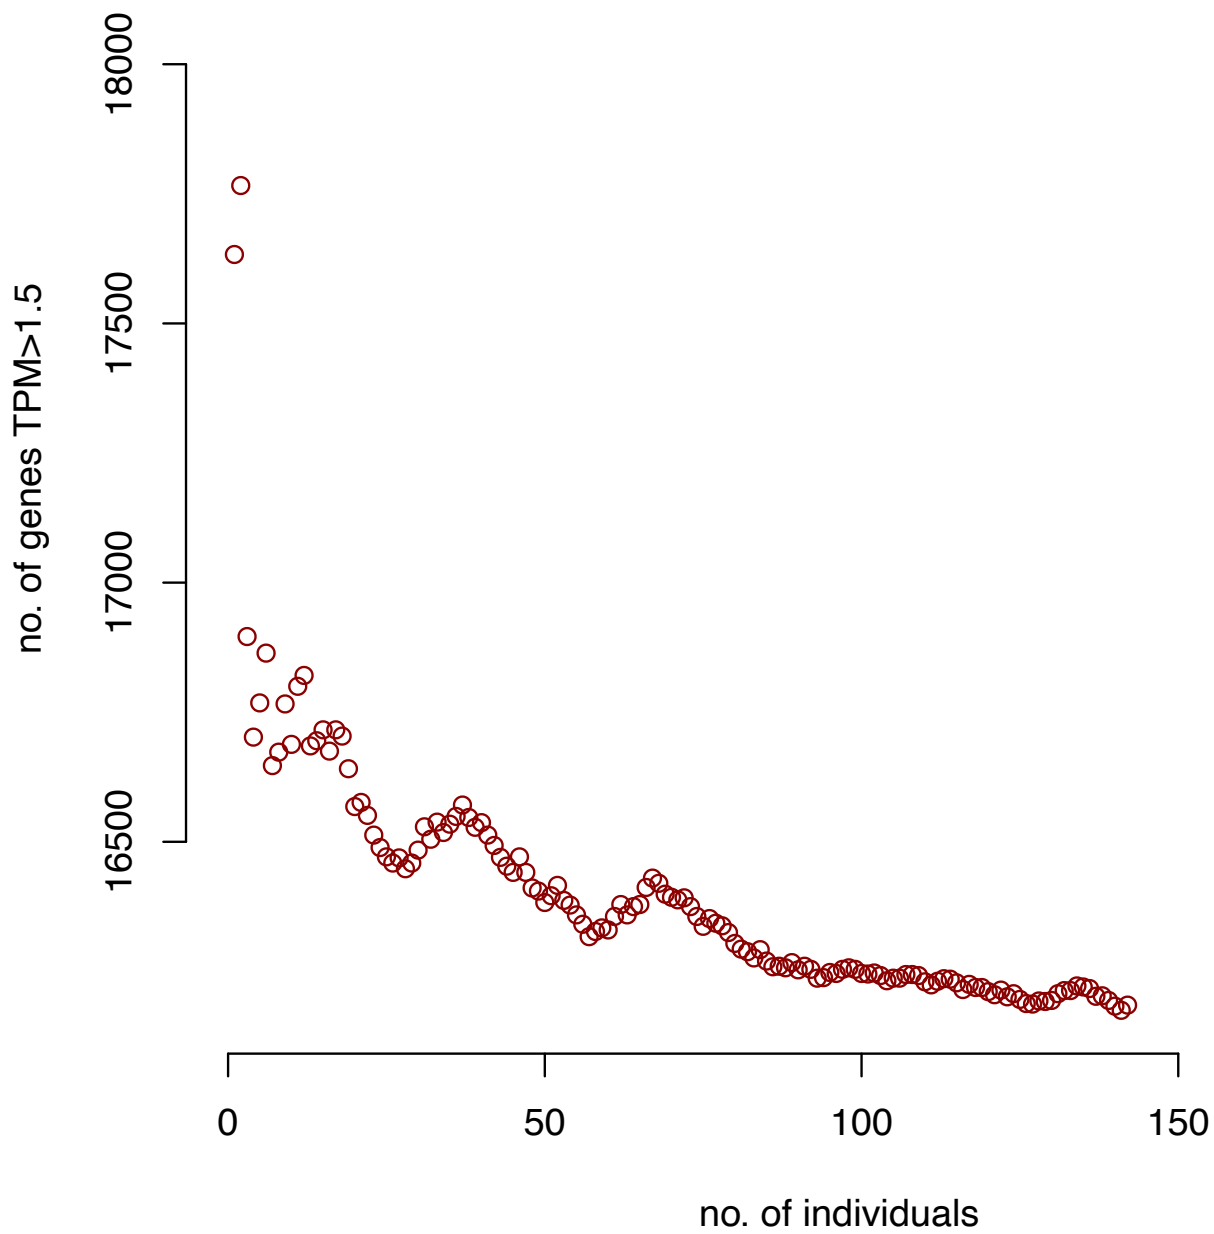

**Gene expression saturation in vagina tissue**  
**(total number of samples = 156)**

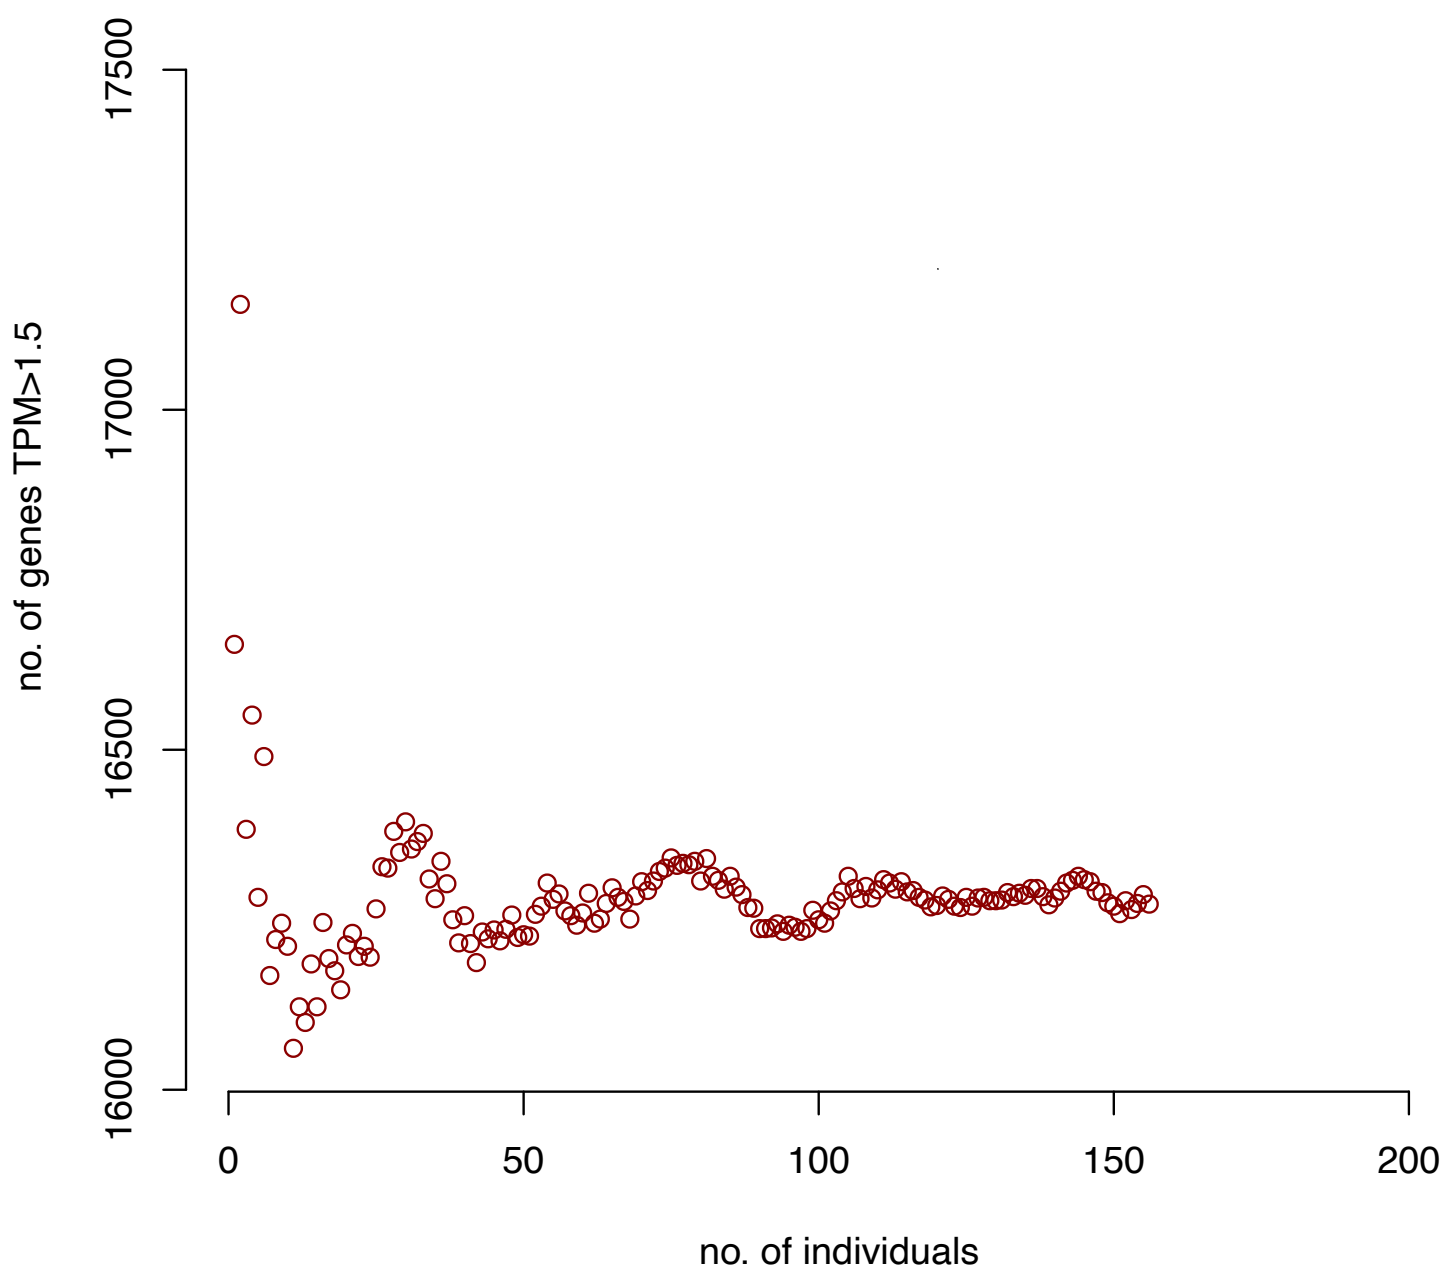

**Gene expression saturation in whole blood  
(total number of samples = 755)**

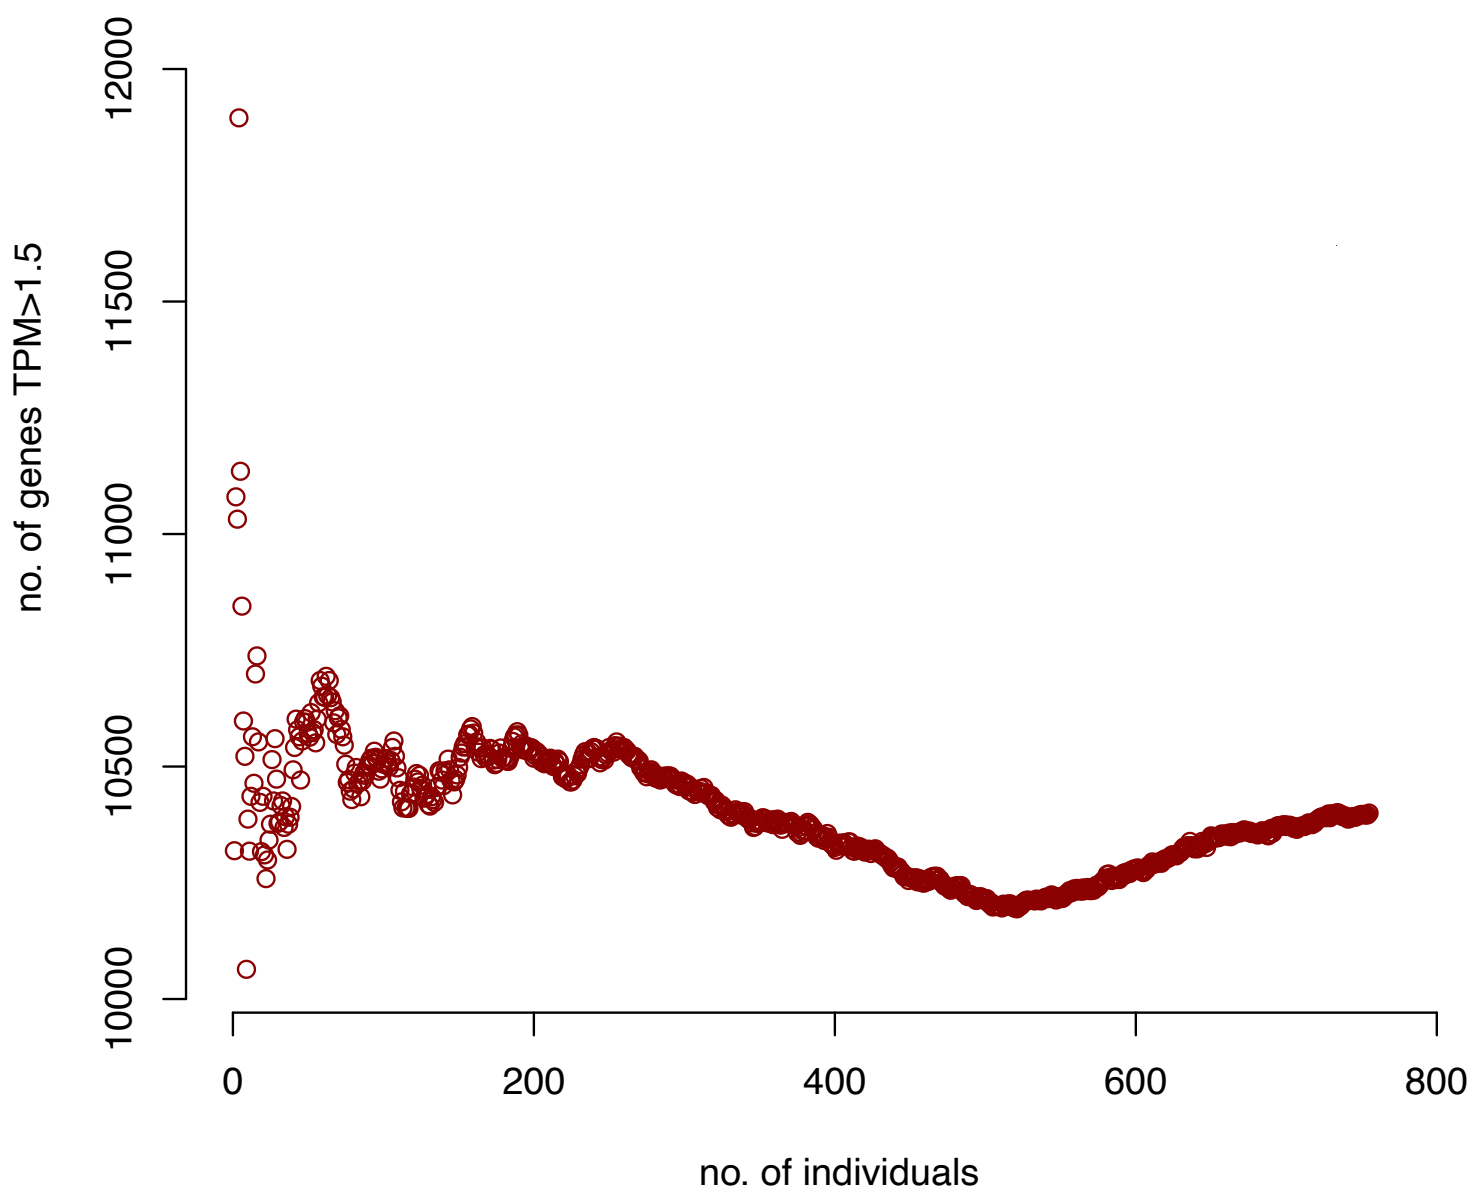

Supplement: MOESM1 [file 12864_2021_8125_MOESM1_ESM.pdf › 12864_2021_8125_MOESM1_ESM.pdf]
